# Supplementary material for: A coordination chemistry dichotomy for icosahedral carborane-based ligands
Source: Springer Nature journal article supplement (doi:10.1038/nchem.1088), 2011-07-21
Supplement: 41557_2011_BFnchem1088_MOESM20_ESM.mol [file 41557_2011_BFnchem1088_MOESM20_ESM.mol]

  ChemDraw07181117182D

 39 59  0  0  0  0  0  0  0  0999 V2000
   -3.4536   -0.5518    0.0000 C   0  0  0  0  0  0  0  0  0  0  0  0
   -2.6646   -0.3108    0.0000 C   0  0  0  0  0  0  0  0  0  0  0  0
   -4.2901   -1.3045    0.0000 C   0  0  0  0  0  0  0  0  0  0  0  0
   -4.6385   -0.5567    0.0000 C   0  0  0  0  0  0  0  0  0  0  0  0
   -5.4604   -0.4845    0.0000 C   0  0  0  0  0  0  0  0  0  0  0  0
   -5.9338   -1.1602    0.0000 C   0  0  0  0  0  0  0  0  0  0  0  0
   -5.5853   -1.9080    0.0000 C   0  0  0  0  0  0  0  0  0  0  0  0
   -4.7635   -1.9801    0.0000 C   0  0  0  0  0  0  0  0  0  0  0  0
   -3.7461   -2.4125    0.0000 C   0  0  0  0  0  0  0  0  0  0  0  0
   -4.5431   -2.6258    0.0000 C   0  0  0  0  0  0  0  0  0  0  0  0
   -4.7568   -3.4226    0.0000 C   0  0  0  0  0  0  0  0  0  0  0  0
   -4.1736   -4.0062    0.0000 C   0  0  0  0  0  0  0  0  0  0  0  0
   -3.3767   -3.7929    0.0000 C   0  0  0  0  0  0  0  0  0  0  0  0
   -3.1629   -2.9960    0.0000 C   0  0  0  0  0  0  0  0  0  0  0  0
   -3.4682   -1.3766    0.0000 P   0  0  0  0  0  0  0  0  0  0  0  0
    0.3412   -0.3134    0.0000 B   0  0  0  0  0  0  0  0  0  0  0  0
    0.3960   -1.6919    0.0000 B   0  0  0  0  0  0  0  0  0  0  0  0
    1.6172   -2.3336    0.0000 B   0  0  0  0  0  0  0  0  0  0  0  0
    2.7835   -1.5969    0.0000 B   0  0  0  0  0  0  0  0  0  0  0  0
    2.7287   -0.2185    0.0000 C   0  0  0  0  0  0  0  0  0  0  0  0
    1.5075    0.4233    0.0000 C   0  0  0  0  0  0  0  0  0  0  0  0
    1.4005    3.1818    0.0000 B   0  0  0  0  0  0  0  0  0  0  0  0
   -1.9022   -3.1159    0.0000 B   0  0  0  0  0  0  0  0  0  0  0  0
    5.2031   -2.8273    0.0000 B   0  0  0  0  0  0  0  0  0  0  0  0
    0.9813   -0.6287    0.0000 B   0  0  0  0  0  0  0  0  0  0  0  0
    2.1622   -0.5789    0.0000 B   0  0  0  0  0  0  0  0  0  0  0  0
    1.5638   -1.5466    0.0000 B   0  0  0  0  0  0  0  0  0  0  0  0
   -2.1916   -0.9867    0.0000 S   0  0  0  0  0  0  0  0  0  0  0  0
    1.3671    4.0062    0.0000 H   0  0  0  0  0  0  0  0  0  0  0  0
    5.9338   -3.2105    0.0000 H   0  0  0  0  0  0  0  0  0  0  0  0
   -2.5994   -3.5570    0.0000 H   0  0  0  0  0  0  0  0  0  0  0  0
   -0.3888    0.0709    0.0000 H   0  0  0  0  0  0  0  0  0  0  0  0
    0.7181    0.1532    0.0000 H   0  0  0  0  0  0  0  0  0  0  0  0
    2.2053    0.8635    0.0000 C   0  0  0  0  0  0  0  0  0  0  0  0
    3.4252    0.2237    0.0000 C   0  0  0  0  0  0  0  0  0  0  0  0
    2.3364    0.2275    0.0000 H   0  0  0  0  0  0  0  0  0  0  0  0
    3.4781   -1.1517    0.0000 H   0  0  0  0  0  0  0  0  0  0  0  0
    1.0389   -2.1830    0.0000 H   0  0  0  0  0  0  0  0  0  0  0  0
    1.6509   -3.1579    0.0000 H   0  0  0  0  0  0  0  0  0  0  0  0
  1 15  1  0      
 28  2  1  0      
  2  1  1  0      
  3  4  2  0      
  4  5  1  0      
  5  6  2  0      
  6  7  1  0      
  7  8  2  0      
  3  8  1  0      
  3 15  1  0      
  9 10  2  0      
 10 11  1  0      
 11 12  2  0      
 12 13  1  0      
 13 14  2  0      
  9 14  1  0      
  9 15  1  0      
 28 17  1  0      
 16 17  1  0      
 17 18  1  0      
 18 19  1  0      
 19 20  1  0      
 20 21  1  0      
 21 16  1  0      
 22 23  1  0      
 23 24  1  0      
 24 22  1  0      
 16 23  1  0      
 17 23  1  0      
 18 23  1  0      
 19 24  1  0      
 21 22  1  0      
 16 22  1  0      
 20 22  1  0      
 20 24  1  0      
 18 24  1  0      
 21 25  1  0      
 17 25  1  0      
 16 25  1  0      
 19 26  1  0      
 26 27  1  0      
 27 19  1  0      
 25 26  1  0      
 27 25  1  0      
 20 26  1  0      
 27 18  1  0      
 27 17  1  0      
 26 21  1  0      
 22 29  1  0      
 24 30  1  0      
 23 31  1  0      
 16 32  1  0      
 25 33  1  0      
 21 34  1  0      
 20 35  1  0      
 26 36  1  0      
 19 37  1  0      
 27 38  1  0      
 18 39  1  0      
M  END
