# Supplementary material for: A coordination chemistry dichotomy for icosahedral carborane-based ligands
Source: Springer Nature journal article supplement (doi:10.1038/nchem.1088), 2011-07-21
Supplement: 41557_2011_BFnchem1088_MOESM22_ESM.mol [file 41557_2011_BFnchem1088_MOESM22_ESM.mol]

  ChemDraw07051107242D

 20 21  0  0  0  0  0  0  0  0999 V2000
   -0.0825    1.4290    0.0000 C   0  0  0  0  0  0  0  0  0  0  0  0
    1.2853    0.6373    0.0000 S   0  0  0  0  0  0  0  0  0  0  0  0
    0.7453    1.4256    0.0000 C   0  0  0  0  0  0  0  0  0  0  0  0
    2.1451    0.6352    0.0000 C   0  0  0  0  0  0  0  0  0  0  0  0
    2.5541   -0.0812    0.0000 C   0  0  0  0  0  0  0  0  0  0  0  0
    2.5602    1.3482    0.0000 C   0  0  0  0  0  0  0  0  0  0  0  0
    2.9701    0.6317    0.0000 C   0  0  0  0  0  0  0  0  0  0  0  0
   -0.4950    0.7145    0.0000 P   0  0  0  0  0  0  0  0  0  0  0  0
   -1.3201    0.7145    0.0000 C   0  0  0  0  0  0  0  0  0  0  0  0
   -1.7326    1.4289    0.0000 C   0  0  0  0  0  0  0  0  0  0  0  0
   -2.5576    1.4289    0.0000 C   0  0  0  0  0  0  0  0  0  0  0  0
   -2.9701    0.7145    0.0000 C   0  0  0  0  0  0  0  0  0  0  0  0
   -2.5576   -0.0000    0.0000 C   0  0  0  0  0  0  0  0  0  0  0  0
   -1.7326    0.0000    0.0000 C   0  0  0  0  0  0  0  0  0  0  0  0
   -0.0825   -0.0001    0.0000 C   0  0  0  0  0  0  0  0  0  0  0  0
   -0.4950   -0.7145    0.0000 C   0  0  0  0  0  0  0  0  0  0  0  0
   -0.0825   -1.4290    0.0000 C   0  0  0  0  0  0  0  0  0  0  0  0
    0.7425   -1.4290    0.0000 C   0  0  0  0  0  0  0  0  0  0  0  0
    1.1550   -0.7145    0.0000 C   0  0  0  0  0  0  0  0  0  0  0  0
    0.7425   -0.0001    0.0000 C   0  0  0  0  0  0  0  0  0  0  0  0
  1  8  1  0      
  2  3  1  0      
  3  1  1  0      
  2  4  1  0      
  4  5  1  0      
  4  6  1  0      
  4  7  1  0      
  8  9  1  0      
  8 15  1  0      
  9 10  2  0      
 10 11  1  0      
 11 12  2  0      
 12 13  1  0      
 13 14  2  0      
  9 14  1  0      
 15 16  2  0      
 16 17  1  0      
 17 18  2  0      
 18 19  1  0      
 19 20  2  0      
 15 20  1  0      
M  END
