# Supplementary material for: A coordination chemistry dichotomy for icosahedral carborane-based ligands
Source: Springer Nature journal article supplement (doi:10.1038/nchem.1088), 2011-07-21
Supplement: 41557_2011_BFnchem1088_MOESM24_ESM.mol [file 41557_2011_BFnchem1088_MOESM24_ESM.mol]

  ChemDraw07051107242D

 27 31  0  0  0  0  0  0  0  0999 V2000
   -0.6834    1.2190    0.0000 C   0  0  0  0  0  0  0  0  0  0  0  0
    0.4832    0.4273    0.0000 S   0  0  0  0  0  0  0  0  0  0  0  0
    0.1444    1.2156    0.0000 C   0  0  0  0  0  0  0  0  0  0  0  0
    1.3095    0.4216    0.0000 C   0  0  0  0  0  0  0  0  0  0  0  0
    1.3120    1.2287    0.0000 C   0  0  0  0  0  0  0  0  0  0  0  0
    1.9395    0.6965    0.0000 C   0  0  0  0  0  0  0  0  0  0  0  0
    2.7432    0.4444    0.0000 C   0  0  0  0  0  0  0  0  0  0  0  0
    2.7564   -0.3833    0.0000 C   0  0  0  0  0  0  0  0  0  0  0  0
    2.7150    1.2511    0.0000 C   0  0  0  0  0  0  0  0  0  0  0  0
    2.0071    1.6390    0.0000 C   0  0  0  0  0  0  0  0  0  0  0  0
    2.4260    0.4215    0.0000 C   0  0  0  0  0  0  0  0  0  0  0  0
    2.0461   -0.8087    0.0000 C   0  0  0  0  0  0  0  0  0  0  0  0
    1.3227   -0.4062    0.0000 C   0  0  0  0  0  0  0  0  0  0  0  0
    3.5710    0.4345    0.0000 H   0  0  0  0  0  0  0  0  0  0  0  0
   -1.0959    0.5045    0.0000 P   0  0  0  0  0  0  0  0  0  0  0  0
   -1.9210    0.5045    0.0000 C   0  0  0  0  0  0  0  0  0  0  0  0
   -2.3335    1.2189    0.0000 C   0  0  0  0  0  0  0  0  0  0  0  0
   -3.1585    1.2189    0.0000 C   0  0  0  0  0  0  0  0  0  0  0  0
   -3.5710    0.5045    0.0000 C   0  0  0  0  0  0  0  0  0  0  0  0
   -3.1585   -0.2100    0.0000 C   0  0  0  0  0  0  0  0  0  0  0  0
   -2.3335   -0.2100    0.0000 C   0  0  0  0  0  0  0  0  0  0  0  0
   -0.6834   -0.2101    0.0000 C   0  0  0  0  0  0  0  0  0  0  0  0
   -1.0959   -0.9245    0.0000 C   0  0  0  0  0  0  0  0  0  0  0  0
   -0.6834   -1.6390    0.0000 C   0  0  0  0  0  0  0  0  0  0  0  0
    0.1416   -1.6390    0.0000 C   0  0  0  0  0  0  0  0  0  0  0  0
    0.5541   -0.9245    0.0000 C   0  0  0  0  0  0  0  0  0  0  0  0
    0.1416   -0.2101    0.0000 C   0  0  0  0  0  0  0  0  0  0  0  0
  1 15  1  0      
  2  3  1  0      
  3  1  1  0      
  2  4  1  0      
  4  5  1  0      
  4  6  1  6      
  7  6  1  6      
  7  8  1  0      
  7  9  1  0      
  9 10  1  0      
  5 10  1  0      
 10 11  1  1      
 12 11  1  1      
  8 12  1  0      
 12 13  1  0      
  4 13  1  0      
  7 14  1  0      
 15 16  1  0      
 15 22  1  0      
 16 17  2  0      
 17 18  1  0      
 18 19  2  0      
 19 20  1  0      
 20 21  2  0      
 16 21  1  0      
 22 23  2  0      
 23 24  1  0      
 24 25  2  0      
 25 26  1  0      
 26 27  2  0      
 22 27  1  0      
M  END
