# Supplementary material for: A coordination chemistry dichotomy for icosahedral carborane-based ligands
Source: Springer Nature journal article supplement (doi:10.1038/nchem.1088), 2011-07-21
Supplement: 41557_2011_BFnchem1088_MOESM32_ESM.cif [file 41557_2011_BFnchem1088_MOESM32_ESM.cif]

 
data_n0679 
  
_audit_creation_method            SHELXL-97 
_chemical_name_systematic 
; 
 ? 
; 
_chemical_name_common             ? 
_chemical_melting_point           ? 
_chemical_formula_moiety         
 'C16 H25 B10 Cl2 P Pt S' 
_chemical_formula_sum 
 'C16 H25 B10 Cl2 P Pt S' 
_chemical_formula_weight          654.48 
  
loop_ 
 _atom_type_symbol 
 _atom_type_description 
 _atom_type_scat_dispersion_real 
 _atom_type_scat_dispersion_imag 
 _atom_type_scat_source 
 'C'  'C'   0.0033   0.0016 
 'International Tables Vol C Tables 4.2.6.8 and 6.1.1.4' 
 'H'  'H'   0.0000   0.0000 
 'International Tables Vol C Tables 4.2.6.8 and 6.1.1.4' 
 'P'  'P'   0.1023   0.0942 
 'International Tables Vol C Tables 4.2.6.8 and 6.1.1.4' 
 'S'  'S'   0.1246   0.1234 
 'International Tables Vol C Tables 4.2.6.8 and 6.1.1.4' 
 'Cl'  'Cl'   0.1484   0.1585 
 'International Tables Vol C Tables 4.2.6.8 and 6.1.1.4' 
 'Pt'  'Pt'  -1.7033   8.3905 
 'International Tables Vol C Tables 4.2.6.8 and 6.1.1.4' 
 'B'  'B'   0.0013   0.0007 
 'International Tables Vol C Tables 4.2.6.8 and 6.1.1.4' 
  
_symmetry_cell_setting            Monoclinic 
_symmetry_space_group_name_H-M    P2(1)/n 
  
loop_ 
 _symmetry_equiv_pos_as_xyz 
 'x, y, z' 
 '-x+1/2, y+1/2, -z+1/2' 
 '-x, -y, -z' 
 'x-1/2, -y-1/2, z-1/2' 
  
_cell_length_a                    12.3211(2) 
_cell_length_b                    13.5986(2) 
_cell_length_c                    14.9381(3) 
_cell_angle_alpha                 90.00 
_cell_angle_beta                  110.0310(10) 
_cell_angle_gamma                 90.00 
_cell_volume                      2351.47(7) 
_cell_formula_units_Z             4 
_cell_measurement_temperature     100(2) 
_cell_measurement_reflns_used     9974 
_cell_measurement_theta_min       2.31 
_cell_measurement_theta_max       30.54 
  
_exptl_crystal_description        plate 
_exptl_crystal_colour             colourless 
_exptl_crystal_size_max           0.40 
_exptl_crystal_size_mid           0.27 
_exptl_crystal_size_min           0.02 
_exptl_crystal_density_meas       ? 
_exptl_crystal_density_diffrn     1.849 
_exptl_crystal_density_method     'not measured' 
_exptl_crystal_F_000              1256 
_exptl_absorpt_coefficient_mu     6.356 
_exptl_absorpt_correction_type    numerical 
_exptl_absorpt_correction_T_min   0.2587
_exptl_absorpt_correction_T_max   0.9028
_exptl_absorpt_process_details    'face-indexed' 
  
_exptl_special_details 
; 
 ? 
; 
  
_diffrn_ambient_temperature       100(2) 
_diffrn_radiation_wavelength      0.71073 
_diffrn_radiation_type            MoK\a 
_diffrn_radiation_source          'fine-focus sealed tube' 
_diffrn_radiation_monochromator   graphite 
_diffrn_measurement_device_type   'Bruker APEX-II CCD' 
_diffrn_measurement_method        '\f and \w scans' 
_diffrn_detector_area_resol_mean  ? 
_diffrn_standards_number          0 
_diffrn_standards_interval_count  ? 
_diffrn_standards_interval_time   ? 
_diffrn_standards_decay_%         ?
_diffrn_reflns_number             48439 
_diffrn_reflns_av_R_equivalents   0.0375 
_diffrn_reflns_av_sigmaI/netI     0.0285 
_diffrn_reflns_limit_h_min        -17 
_diffrn_reflns_limit_h_max        17 
_diffrn_reflns_limit_k_min        -19 
_diffrn_reflns_limit_k_max        19 
_diffrn_reflns_limit_l_min        -21 
_diffrn_reflns_limit_l_max        21 
_diffrn_reflns_theta_min          1.86 
_diffrn_reflns_theta_max          30.55 
_reflns_number_total              7180 
_reflns_number_gt                 6156 
_reflns_threshold_expression      >2sigma(I) 
  
_computing_data_collection        'Bruker APEX2' 
_computing_cell_refinement        'Bruker SAINT' 
_computing_data_reduction         'Bruker SAINT' 
_computing_structure_solution     'SHELXS-97 (Sheldrick, 2008)' 
_computing_structure_refinement   'SHELXL-97 (Sheldrick, 2008)' 
_computing_molecular_graphics     'Bruker SHELXTL' 
_computing_publication_material   'Bruker SHELXTL' 
  
_refine_special_details 
; 
 Refinement of F^2^ against ALL reflections.  The weighted R-factor wR and 
 goodness of fit S are based on F^2^, conventional R-factors R are based 
 on F, with F set to zero for negative F^2^. The threshold expression of 
 F^2^ > 2sigma(F^2^) is used only for calculating R-factors(gt) etc. and is 
 not relevant to the choice of reflections for refinement.  R-factors based 
 on F^2^ are statistically about twice as large as those based on F, and R- 
 factors based on ALL data will be even larger. 
; 
  
_refine_ls_structure_factor_coef  Fsqd 
_refine_ls_matrix_type            full 
_refine_ls_weighting_scheme       calc 
_refine_ls_weighting_details 
 'calc w=1/[\s^2^(Fo^2^)+(0.0184P)^2^+4.0269P] where P=(Fo^2^+2Fc^2^)/3' 
_atom_sites_solution_primary      direct 
_atom_sites_solution_secondary    difmap 
_atom_sites_solution_hydrogens    geom 
_refine_ls_hydrogen_treatment     constr 
_refine_ls_extinction_method      none 
_refine_ls_extinction_coef        ? 
_refine_ls_number_reflns          7180 
_refine_ls_number_parameters      280 
_refine_ls_number_restraints      0 
_refine_ls_R_factor_all           0.0326 
_refine_ls_R_factor_gt            0.0227 
_refine_ls_wR_factor_ref          0.0509 
_refine_ls_wR_factor_gt           0.0470 
_refine_ls_goodness_of_fit_ref    1.036 
_refine_ls_restrained_S_all       1.036 
_refine_ls_shift/su_max           0.002 
_refine_ls_shift/su_mean          0.000 
  
loop_ 
 _atom_site_label 
 _atom_site_type_symbol 
 _atom_site_fract_x 
 _atom_site_fract_y 
 _atom_site_fract_z 
 _atom_site_U_iso_or_equiv 
 _atom_site_adp_type 
 _atom_site_occupancy 
 _atom_site_symmetry_multiplicity 
 _atom_site_calc_flag 
 _atom_site_refinement_flags 
 _atom_site_disorder_assembly 
 _atom_site_disorder_group 
Pt1 Pt 0.379256(8) 0.786606(7) 0.230368(6) 0.01370(3) Uani 1 1 d . . . 
S1 S 0.57073(5) 0.82394(5) 0.28534(4) 0.01546(12) Uani 1 1 d . . . 
Cl1 Cl 0.38173(6) 0.77334(5) 0.07302(5) 0.02512(14) Uani 1 1 d . . . 
Cl2 Cl 0.18582(5) 0.74036(5) 0.17896(5) 0.02117(13) Uani 1 1 d . . . 
P1 P 0.37938(5) 0.79633(5) 0.37808(4) 0.01347(12) Uani 1 1 d . . . 
C1 C 0.5591(2) 1.1548(2) 0.2410(2) 0.0215(5) Uani 1 1 d . . . 
H1B H 0.5093 1.2186 0.2545 0.026 Uiso 1 1 calc R . . 
C7 C 0.6546(2) 1.0712(2) 0.12905(19) 0.0189(5) Uani 1 1 d . . . 
H7B H 0.6740 1.0746 0.0612 0.023 Uiso 1 1 calc R . . 
C8 C 0.6106(2) 0.8249(2) 0.41551(18) 0.0188(5) Uani 1 1 d . . . 
H8C H 0.6329 0.7576 0.4403 0.023 Uiso 1 1 calc R . . 
H8D H 0.6785 0.8682 0.4432 0.023 Uiso 1 1 calc R . . 
C9 C 0.5127(2) 0.8606(2) 0.44694(17) 0.0172(5) Uani 1 1 d . . . 
H9A H 0.5024 0.9324 0.4365 0.021 Uiso 1 1 calc R . . 
H9B H 0.5312 0.8474 0.5157 0.021 Uiso 1 1 calc R . . 
C10 C 0.2620(2) 0.8667(2) 0.39276(17) 0.0164(5) Uani 1 1 d . . . 
C11 C 0.2509(2) 0.9659(2) 0.3666(2) 0.0236(6) Uani 1 1 d . . . 
H11 H 0.3065 0.9960 0.3443 0.028 Uiso 1 1 calc R . . 
C12 C 0.1588(3) 1.0203(2) 0.3732(2) 0.0281(6) Uani 1 1 d . . . 
H12 H 0.1519 1.0879 0.3561 0.034 Uiso 1 1 calc R . . 
C13 C 0.0765(2) 0.9765(2) 0.4048(2) 0.0252(6) Uani 1 1 d . . . 
H13 H 0.0128 1.0138 0.4082 0.030 Uiso 1 1 calc R . . 
C14 C 0.0877(2) 0.8786(2) 0.4312(2) 0.0242(6) Uani 1 1 d . . . 
H14 H 0.0322 0.8488 0.4538 0.029 Uiso 1 1 calc R . . 
C15 C 0.1802(2) 0.8234(2) 0.4249(2) 0.0209(5) Uani 1 1 d . . . 
H15 H 0.1872 0.7560 0.4427 0.025 Uiso 1 1 calc R . . 
C16 C 0.3802(2) 0.6792(2) 0.43608(18) 0.0166(5) Uani 1 1 d . . . 
C17 C 0.3421(2) 0.5950(2) 0.3825(2) 0.0216(5) Uani 1 1 d . . . 
H17 H 0.3191 0.5979 0.3150 0.026 Uiso 1 1 calc R . . 
C18 C 0.3372(2) 0.5052(2) 0.4275(2) 0.0261(6) Uani 1 1 d . . . 
H18 H 0.3094 0.4478 0.3905 0.031 Uiso 1 1 calc R . . 
C19 C 0.3730(2) 0.5010(2) 0.5252(2) 0.0261(6) Uani 1 1 d . . . 
H19 H 0.3700 0.4404 0.5558 0.031 Uiso 1 1 calc R . . 
C20 C 0.4132(2) 0.5845(2) 0.5794(2) 0.0252(6) Uani 1 1 d . . . 
H20 H 0.4390 0.5807 0.6469 0.030 Uiso 1 1 calc R . . 
C21 C 0.4159(2) 0.6739(2) 0.53541(19) 0.0200(5) Uani 1 1 d . . . 
H21 H 0.4421 0.7314 0.5727 0.024 Uiso 1 1 calc R . . 
B2 B 0.5259(3) 1.1166(2) 0.1270(2) 0.0196(6) Uani 1 1 d . . . 
H2B H 0.4587 1.1504 0.0636 0.023 Uiso 1 1 calc R . . 
B3 B 0.6585(3) 1.1782(2) 0.1882(2) 0.0202(6) Uani 1 1 d . . . 
H3B H 0.6784 1.2525 0.1653 0.024 Uiso 1 1 calc R . . 
B4 B 0.7027(3) 1.1450(3) 0.3091(2) 0.0248(7) Uani 1 1 d . . . 
H4B H 0.7509 1.1976 0.3668 0.030 Uiso 1 1 calc R . . 
B5 B 0.5981(3) 1.0621(2) 0.3238(2) 0.0212(6) Uani 1 1 d . . . 
H5B H 0.5782 1.0602 0.3915 0.025 Uiso 1 1 calc R . . 
B6 B 0.4879(3) 1.0452(2) 0.2108(2) 0.0193(6) Uani 1 1 d . . . 
H6B H 0.3957 1.0322 0.2042 0.023 Uiso 1 1 calc R . . 
B8 B 0.5525(3) 0.9893(2) 0.1345(2) 0.0187(6) Uani 1 1 d . . . 
H8B H 0.5036 0.9382 0.0756 0.022 Uiso 1 1 calc R . . 
B9 B 0.5964(2) 0.9549(2) 0.2559(2) 0.0157(5) Uani 1 1 d . . . 
B10 B 0.7303(3) 1.0156(3) 0.3178(2) 0.0222(6) Uani 1 1 d . . . 
H10B H 0.7976 0.9817 0.3809 0.027 Uiso 1 1 calc R . . 
B11 B 0.7672(3) 1.0884(3) 0.2331(2) 0.0236(6) Uani 1 1 d . . . 
H11B H 0.8590 1.1024 0.2391 0.028 Uiso 1 1 calc R . . 
B12 B 0.7019(3) 0.9710(2) 0.2001(2) 0.0208(6) Uani 1 1 d . . . 
H12B H 0.7512 0.9079 0.1845 0.025 Uiso 1 1 calc R . . 
  
loop_ 
 _atom_site_aniso_label 
 _atom_site_aniso_U_11 
 _atom_site_aniso_U_22 
 _atom_site_aniso_U_33 
 _atom_site_aniso_U_23 
 _atom_site_aniso_U_13 
 _atom_site_aniso_U_12 
Pt1 0.01491(5) 0.01352(5) 0.01313(5) -0.00077(4) 0.00541(3) -0.00150(4) 
S1 0.0153(3) 0.0145(3) 0.0188(3) -0.0001(2) 0.0086(2) 0.0004(2) 
Cl1 0.0332(3) 0.0285(4) 0.0157(3) -0.0041(3) 0.0110(3) -0.0133(3) 
Cl2 0.0166(3) 0.0252(3) 0.0199(3) -0.0019(3) 0.0039(2) -0.0038(3) 
P1 0.0128(3) 0.0144(3) 0.0136(3) -0.0003(2) 0.0052(2) -0.0001(2) 
C1 0.0284(13) 0.0160(13) 0.0252(14) 0.0000(11) 0.0159(11) 0.0003(11) 
C7 0.0203(11) 0.0197(13) 0.0200(12) -0.0002(10) 0.0111(10) 0.0001(11) 
C8 0.0137(10) 0.0215(13) 0.0190(12) 0.0054(11) 0.0028(9) 0.0001(10) 
C9 0.0188(11) 0.0181(13) 0.0145(11) -0.0008(10) 0.0054(9) -0.0036(10) 
C10 0.0190(11) 0.0163(12) 0.0156(11) -0.0016(10) 0.0079(9) 0.0022(10) 
C11 0.0299(14) 0.0197(14) 0.0272(14) 0.0060(11) 0.0174(12) 0.0017(12) 
C12 0.0384(16) 0.0187(14) 0.0331(16) 0.0063(12) 0.0198(14) 0.0103(13) 
C13 0.0258(13) 0.0247(15) 0.0275(15) -0.0008(12) 0.0125(11) 0.0089(12) 
C14 0.0185(12) 0.0271(15) 0.0302(15) -0.0008(12) 0.0123(11) 0.0005(11) 
C15 0.0176(11) 0.0181(13) 0.0285(14) 0.0010(11) 0.0099(10) -0.0007(11) 
C16 0.0145(10) 0.0160(12) 0.0209(12) 0.0026(10) 0.0081(9) 0.0019(10) 
C17 0.0205(12) 0.0186(13) 0.0246(14) 0.0007(11) 0.0062(10) -0.0003(11) 
C18 0.0205(12) 0.0165(14) 0.0413(17) -0.0005(12) 0.0107(12) 0.0002(11) 
C19 0.0215(13) 0.0213(14) 0.0423(18) 0.0120(13) 0.0196(13) 0.0044(12) 
C20 0.0262(13) 0.0260(15) 0.0295(15) 0.0088(12) 0.0171(12) 0.0048(12) 
C21 0.0191(11) 0.0210(14) 0.0228(13) 0.0002(11) 0.0109(10) 0.0008(11) 
B2 0.0187(13) 0.0184(15) 0.0223(14) 0.0000(12) 0.0079(11) -0.0009(12) 
B3 0.0222(13) 0.0196(15) 0.0205(14) -0.0002(12) 0.0097(11) -0.0050(12) 
B4 0.0317(16) 0.0236(16) 0.0184(14) -0.0013(13) 0.0075(12) -0.0094(14) 
B5 0.0307(15) 0.0175(15) 0.0195(14) -0.0020(12) 0.0136(12) -0.0029(13) 
B6 0.0175(12) 0.0176(15) 0.0260(15) 0.0002(12) 0.0116(11) -0.0002(11) 
B8 0.0213(13) 0.0187(15) 0.0167(13) 0.0001(11) 0.0073(11) -0.0031(12) 
B9 0.0158(12) 0.0171(14) 0.0169(13) -0.0009(11) 0.0092(10) -0.0012(11) 
B10 0.0200(13) 0.0239(16) 0.0214(15) 0.0023(12) 0.0052(11) -0.0048(13) 
B11 0.0180(13) 0.0247(17) 0.0294(16) 0.0065(13) 0.0097(12) -0.0010(13) 
B12 0.0195(13) 0.0210(16) 0.0275(16) 0.0043(13) 0.0152(12) 0.0019(12) 
  
_geom_special_details 
; 
 All esds (except the esd in the dihedral angle between two l.s. planes) 
 are estimated using the full covariance matrix.  The cell esds are taken 
 into account individually in the estimation of esds in distances, angles 
 and torsion angles; correlations between esds in cell parameters are only 
 used when they are defined by crystal symmetry.  An approximate (isotropic) 
 treatment of cell esds is used for estimating esds involving l.s. planes. 
; 
  
loop_ 
 _geom_bond_atom_site_label_1 
 _geom_bond_atom_site_label_2 
 _geom_bond_distance 
 _geom_bond_site_symmetry_2 
 _geom_bond_publ_flag 
Pt1 P1 2.2099(6) . ? 
Pt1 S1 2.2739(6) . ? 
Pt1 Cl2 2.3263(6) . ? 
Pt1 Cl1 2.3680(6) . ? 
S1 C8 1.835(3) . ? 
S1 B9 1.886(3) . ? 
P1 C10 1.809(2) . ? 
P1 C16 1.812(3) . ? 
P1 C9 1.834(3) . ? 
C1 B2 1.691(4) . ? 
C1 B3 1.698(4) . ? 
C1 B6 1.710(4) . ? 
C1 B5 1.716(4) . ? 
C1 B4 1.718(5) . ? 
C1 H1B 1.1200 . ? 
C7 B2 1.692(4) . ? 
C7 B3 1.695(4) . ? 
C7 B8 1.703(4) . ? 
C7 B12 1.703(4) . ? 
C7 B11 1.709(4) . ? 
C7 H7B 1.1200 . ? 
C8 C9 1.517(3) . ? 
C8 H8C 0.9900 . ? 
C8 H8D 0.9900 . ? 
C9 H9A 0.9900 . ? 
C9 H9B 0.9900 . ? 
C10 C15 1.387(3) . ? 
C10 C11 1.398(4) . ? 
C11 C12 1.387(4) . ? 
C11 H11 0.9500 . ? 
C12 C13 1.390(4) . ? 
C12 H12 0.9500 . ? 
C13 C14 1.382(4) . ? 
C13 H13 0.9500 . ? 
C14 C15 1.395(4) . ? 
C14 H14 0.9500 . ? 
C15 H15 0.9500 . ? 
C16 C17 1.384(4) . ? 
C16 C21 1.398(4) . ? 
C17 C18 1.404(4) . ? 
C17 H17 0.9500 . ? 
C18 C19 1.374(4) . ? 
C18 H18 0.9500 . ? 
C19 C20 1.384(4) . ? 
C19 H19 0.9500 . ? 
C20 C21 1.387(4) . ? 
C20 H20 0.9500 . ? 
C21 H21 0.9500 . ? 
B2 B8 1.759(4) . ? 
B2 B6 1.769(4) . ? 
B2 B3 1.785(4) . ? 
B2 H2B 1.1200 . ? 
B3 B4 1.758(4) . ? 
B3 B11 1.767(5) . ? 
B3 H3B 1.1200 . ? 
B4 B11 1.770(5) . ? 
B4 B5 1.782(4) . ? 
B4 B10 1.789(5) . ? 
B4 H4B 1.1200 . ? 
B5 B9 1.771(4) . ? 
B5 B10 1.777(4) . ? 
B5 B6 1.782(5) . ? 
B5 H5B 1.1200 . ? 
B6 B8 1.769(4) . ? 
B6 B9 1.770(4) . ? 
B6 H6B 1.1200 . ? 
B8 B9 1.769(4) . ? 
B8 B12 1.782(4) . ? 
B8 H8B 1.1200 . ? 
B9 B12 1.782(4) . ? 
B9 B10 1.792(4) . ? 
B10 B12 1.777(5) . ? 
B10 B11 1.783(4) . ? 
B10 H10B 1.1200 . ? 
B11 B12 1.780(5) . ? 
B11 H11B 1.1200 . ? 
B12 H12B 1.1200 . ? 
  
loop_ 
 _geom_angle_atom_site_label_1 
 _geom_angle_atom_site_label_2 
 _geom_angle_atom_site_label_3 
 _geom_angle 
 _geom_angle_site_symmetry_1 
 _geom_angle_site_symmetry_3 
 _geom_angle_publ_flag 
P1 Pt1 S1 88.87(2) . . ? 
P1 Pt1 Cl2 89.77(2) . . ? 
S1 Pt1 Cl2 176.82(2) . . ? 
P1 Pt1 Cl1 178.81(3) . . ? 
S1 Pt1 Cl1 90.63(2) . . ? 
Cl2 Pt1 Cl1 90.68(2) . . ? 
C8 S1 B9 103.57(13) . . ? 
C8 S1 Pt1 104.63(8) . . ? 
B9 S1 Pt1 111.27(9) . . ? 
C10 P1 C16 106.29(11) . . ? 
C10 P1 C9 106.25(12) . . ? 
C16 P1 C9 107.06(12) . . ? 
C10 P1 Pt1 115.19(8) . . ? 
C16 P1 Pt1 115.02(9) . . ? 
C9 P1 Pt1 106.43(8) . . ? 
B2 C1 B3 63.58(17) . . ? 
B2 C1 B6 62.69(18) . . ? 
B3 C1 B6 115.3(2) . . ? 
B2 C1 B5 114.3(2) . . ? 
B3 C1 B5 113.8(2) . . ? 
B6 C1 B5 62.67(18) . . ? 
B2 C1 B4 114.7(2) . . ? 
B3 C1 B4 61.92(18) . . ? 
B6 C1 B4 114.8(2) . . ? 
B5 C1 B4 62.51(18) . . ? 
B2 C1 H1B 117.5 . . ? 
B3 C1 H1B 117.7 . . ? 
B6 C1 H1B 117.3 . . ? 
B5 C1 H1B 118.3 . . ? 
B4 C1 H1B 118.0 . . ? 
B2 C7 B3 63.62(17) . . ? 
B2 C7 B8 62.39(17) . . ? 
B3 C7 B8 115.3(2) . . ? 
B2 C7 B12 115.0(2) . . ? 
B3 C7 B12 114.8(2) . . ? 
B8 C7 B12 63.10(17) . . ? 
B2 C7 B11 115.5(2) . . ? 
B3 C7 B11 62.54(18) . . ? 
B8 C7 B11 115.4(2) . . ? 
B12 C7 B11 62.89(18) . . ? 
B2 C7 H7B 117.3 . . ? 
B3 C7 H7B 117.4 . . ? 
B8 C7 H7B 117.4 . . ? 
B12 C7 H7B 117.6 . . ? 
B11 C7 H7B 117.3 . . ? 
C9 C8 S1 112.18(17) . . ? 
C9 C8 H8C 109.2 . . ? 
S1 C8 H8C 109.2 . . ? 
C9 C8 H8D 109.2 . . ? 
S1 C8 H8D 109.2 . . ? 
H8C C8 H8D 107.9 . . ? 
C8 C9 P1 109.20(18) . . ? 
C8 C9 H9A 109.8 . . ? 
P1 C9 H9A 109.8 . . ? 
C8 C9 H9B 109.8 . . ? 
P1 C9 H9B 109.8 . . ? 
H9A C9 H9B 108.3 . . ? 
C15 C10 C11 119.6(2) . . ? 
C15 C10 P1 121.6(2) . . ? 
C11 C10 P1 118.79(19) . . ? 
C12 C11 C10 119.9(3) . . ? 
C12 C11 H11 120.1 . . ? 
C10 C11 H11 120.1 . . ? 
C11 C12 C13 120.4(3) . . ? 
C11 C12 H12 119.8 . . ? 
C13 C12 H12 119.8 . . ? 
C14 C13 C12 119.8(3) . . ? 
C14 C13 H13 120.1 . . ? 
C12 C13 H13 120.1 . . ? 
C13 C14 C15 120.2(3) . . ? 
C13 C14 H14 119.9 . . ? 
C15 C14 H14 119.9 . . ? 
C10 C15 C14 120.2(3) . . ? 
C10 C15 H15 119.9 . . ? 
C14 C15 H15 119.9 . . ? 
C17 C16 C21 119.5(3) . . ? 
C17 C16 P1 120.4(2) . . ? 
C21 C16 P1 120.1(2) . . ? 
C16 C17 C18 120.3(3) . . ? 
C16 C17 H17 119.9 . . ? 
C18 C17 H17 119.9 . . ? 
C19 C18 C17 119.6(3) . . ? 
C19 C18 H18 120.2 . . ? 
C17 C18 H18 120.2 . . ? 
C18 C19 C20 120.5(3) . . ? 
C18 C19 H19 119.8 . . ? 
C20 C19 H19 119.8 . . ? 
C19 C20 C21 120.3(3) . . ? 
C19 C20 H20 119.9 . . ? 
C21 C20 H20 119.9 . . ? 
C20 C21 C16 119.9(3) . . ? 
C20 C21 H21 120.1 . . ? 
C16 C21 H21 120.1 . . ? 
C1 B2 C7 101.0(2) . . ? 
C1 B2 B8 105.2(2) . . ? 
C7 B2 B8 59.11(17) . . ? 
C1 B2 B6 59.19(17) . . ? 
C7 B2 B6 105.1(2) . . ? 
B8 B2 B6 60.19(17) . . ? 
C1 B2 B3 58.41(16) . . ? 
C7 B2 B3 58.26(17) . . ? 
B8 B2 B3 108.1(2) . . ? 
B6 B2 B3 108.2(2) . . ? 
C1 B2 H2B 125.4 . . ? 
C7 B2 H2B 125.5 . . ? 
B8 B2 H2B 121.7 . . ? 
B6 B2 H2B 121.7 . . ? 
B3 B2 H2B 121.4 . . ? 
C7 B3 C1 100.6(2) . . ? 
C7 B3 B4 105.0(2) . . ? 
C1 B3 B4 59.59(18) . . ? 
C7 B3 B11 59.11(18) . . ? 
C1 B3 B11 105.5(2) . . ? 
B4 B3 B11 60.30(19) . . ? 
C7 B3 B2 58.12(16) . . ? 
C1 B3 B2 58.01(16) . . ? 
B4 B3 B2 108.2(2) . . ? 
B11 B3 B2 108.2(2) . . ? 
C7 B3 H3B 125.8 . . ? 
C1 B3 H3B 125.4 . . ? 
B4 B3 H3B 121.5 . . ? 
B11 B3 H3B 121.5 . . ? 
B2 B3 H3B 121.6 . . ? 
C1 B4 B3 58.49(17) . . ? 
C1 B4 B11 104.5(2) . . ? 
B3 B4 B11 60.11(18) . . ? 
C1 B4 B5 58.68(17) . . ? 
B3 B4 B5 107.8(2) . . ? 
B11 B4 B5 107.8(2) . . ? 
C1 B4 B10 104.5(2) . . ? 
B3 B4 B10 108.1(2) . . ? 
B11 B4 B10 60.14(19) . . ? 
B5 B4 B10 59.70(18) . . ? 
C1 B4 H4B 124.9 . . ? 
B3 B4 H4B 121.5 . . ? 
B11 B4 H4B 122.3 . . ? 
B5 B4 H4B 121.7 . . ? 
B10 B4 H4B 122.4 . . ? 
C1 B5 B9 104.3(2) . . ? 
C1 B5 B10 105.1(2) . . ? 
B9 B5 B10 60.67(17) . . ? 
C1 B5 B4 58.81(18) . . ? 
B9 B5 B4 108.6(2) . . ? 
B10 B5 B4 60.35(19) . . ? 
C1 B5 B6 58.51(17) . . ? 
B9 B5 B6 59.75(17) . . ? 
B10 B5 B6 108.7(2) . . ? 
B4 B5 B6 108.3(2) . . ? 
C1 B5 H5B 125.0 . . ? 
B9 B5 H5B 122.3 . . ? 
B10 B5 H5B 121.7 . . ? 
B4 B5 H5B 121.1 . . ? 
B6 B5 H5B 121.4 . . ? 
C1 B6 B8 104.0(2) . . ? 
C1 B6 B2 58.12(16) . . ? 
B8 B6 B2 59.60(17) . . ? 
C1 B6 B9 104.6(2) . . ? 
B8 B6 B9 59.99(16) . . ? 
B2 B6 B9 107.61(19) . . ? 
C1 B6 B5 58.82(17) . . ? 
B8 B6 B5 107.5(2) . . ? 
B2 B6 B5 107.4(2) . . ? 
B9 B6 B5 59.83(17) . . ? 
C1 B6 H6B 125.0 . . ? 
B8 B6 H6B 122.8 . . ? 
B2 B6 H6B 122.0 . . ? 
B9 B6 H6B 122.4 . . ? 
B5 B6 H6B 121.7 . . ? 
C7 B8 B2 58.50(16) . . ? 
C7 B8 B6 104.6(2) . . ? 
B2 B8 B6 60.20(17) . . ? 
C7 B8 B9 104.5(2) . . ? 
B2 B8 B9 108.1(2) . . ? 
B6 B8 B9 60.02(17) . . ? 
C7 B8 B12 58.45(16) . . ? 
B2 B8 B12 107.9(2) . . ? 
B6 B8 B12 108.3(2) . . ? 
B9 B8 B12 60.22(16) . . ? 
C7 B8 H8B 125.1 . . ? 
B2 B8 H8B 121.5 . . ? 
B6 B8 H8B 122.2 . . ? 
B9 B8 H8B 122.3 . . ? 
B12 B8 H8B 121.4 . . ? 
B8 B9 B6 59.99(17) . . ? 
B8 B9 B5 108.0(2) . . ? 
B6 B9 B5 60.42(18) . . ? 
B8 B9 B12 60.25(16) . . ? 
B6 B9 B12 108.3(2) . . ? 
B5 B9 B12 107.4(2) . . ? 
B8 B9 B10 108.1(2) . . ? 
B6 B9 B10 108.6(2) . . ? 
B5 B9 B10 59.82(18) . . ? 
B12 B9 B10 59.63(17) . . ? 
B8 B9 S1 118.13(19) . . ? 
B6 B9 S1 125.35(18) . . ? 
B5 B9 S1 127.87(18) . . ? 
B12 B9 S1 115.62(19) . . ? 
B10 B9 S1 120.89(19) . . ? 
B5 B10 B12 107.3(2) . . ? 
B5 B10 B11 107.4(2) . . ? 
B12 B10 B11 59.99(18) . . ? 
B5 B10 B4 59.96(18) . . ? 
B12 B10 B4 107.3(2) . . ? 
B11 B10 B4 59.41(18) . . ? 
B5 B10 B9 59.51(17) . . ? 
B12 B10 B9 59.90(16) . . ? 
B11 B10 B9 107.7(2) . . ? 
B4 B10 B9 107.3(2) . . ? 
B5 B10 H10B 122.1 . . ? 
B12 B10 H10B 122.0 . . ? 
B11 B10 H10B 122.0 . . ? 
B4 B10 H10B 122.2 . . ? 
B9 B10 H10B 122.0 . . ? 
C7 B11 B3 58.35(17) . . ? 
C7 B11 B4 103.9(2) . . ? 
B3 B11 B4 59.60(18) . . ? 
C7 B11 B12 58.40(17) . . ? 
B3 B11 B12 107.6(2) . . ? 
B4 B11 B12 108.0(2) . . ? 
C7 B11 B10 104.1(2) . . ? 
B3 B11 B10 108.0(2) . . ? 
B4 B11 B10 60.44(18) . . ? 
B12 B11 B10 59.83(18) . . ? 
C7 B11 H11B 125.4 . . ? 
B3 B11 H11B 121.7 . . ? 
B4 B11 H11B 122.5 . . ? 
B12 B11 H11B 121.6 . . ? 
B10 B11 H11B 122.3 . . ? 
C7 B12 B10 104.6(2) . . ? 
C7 B12 B11 58.70(17) . . ? 
B10 B12 B11 60.18(18) . . ? 
C7 B12 B9 104.0(2) . . ? 
B10 B12 B9 60.47(16) . . ? 
B11 B12 B9 108.3(2) . . ? 
C7 B12 B8 58.45(16) . . ? 
B10 B12 B8 108.2(2) . . ? 
B11 B12 B8 108.1(2) . . ? 
B9 B12 B8 59.53(16) . . ? 
C7 B12 H12B 125.2 . . ? 
B10 B12 H12B 122.0 . . ? 
B11 B12 H12B 121.2 . . ? 
B9 B12 H12B 122.5 . . ? 
B8 B12 H12B 121.6 . . ? 
  
loop_ 
 _geom_torsion_atom_site_label_1 
 _geom_torsion_atom_site_label_2 
 _geom_torsion_atom_site_label_3 
 _geom_torsion_atom_site_label_4 
 _geom_torsion 
 _geom_torsion_site_symmetry_1 
 _geom_torsion_site_symmetry_2 
 _geom_torsion_site_symmetry_3 
 _geom_torsion_site_symmetry_4 
 _geom_torsion_publ_flag 
P1 Pt1 S1 C8 6.26(10) . . . . ? 
Cl2 Pt1 S1 C8 -58.4(4) . . . . ? 
Cl1 Pt1 S1 C8 -172.67(10) . . . . ? 
P1 Pt1 S1 B9 -104.95(9) . . . . ? 
Cl2 Pt1 S1 B9 -169.6(4) . . . . ? 
Cl1 Pt1 S1 B9 76.13(9) . . . . ? 
S1 Pt1 P1 C10 133.28(10) . . . . ? 
Cl2 Pt1 P1 C10 -49.59(10) . . . . ? 
Cl1 Pt1 P1 C10 -161.7(11) . . . . ? 
S1 Pt1 P1 C16 -102.55(9) . . . . ? 
Cl2 Pt1 P1 C16 74.58(9) . . . . ? 
Cl1 Pt1 P1 C16 -37.6(12) . . . . ? 
S1 Pt1 P1 C9 15.82(9) . . . . ? 
Cl2 Pt1 P1 C9 -167.05(9) . . . . ? 
Cl1 Pt1 P1 C9 80.8(12) . . . . ? 
B9 S1 C8 C9 83.4(2) . . . . ? 
Pt1 S1 C8 C9 -33.3(2) . . . . ? 
S1 C8 C9 P1 48.0(2) . . . . ? 
C10 P1 C9 C8 -163.35(18) . . . . ? 
C16 P1 C9 C8 83.37(19) . . . . ? 
Pt1 P1 C9 C8 -40.11(19) . . . . ? 
C16 P1 C10 C15 -12.0(3) . . . . ? 
C9 P1 C10 C15 -125.8(2) . . . . ? 
Pt1 P1 C10 C15 116.6(2) . . . . ? 
C16 P1 C10 C11 171.1(2) . . . . ? 
C9 P1 C10 C11 57.3(2) . . . . ? 
Pt1 P1 C10 C11 -60.3(2) . . . . ? 
C15 C10 C11 C12 0.2(4) . . . . ? 
P1 C10 C11 C12 177.2(2) . . . . ? 
C10 C11 C12 C13 -0.7(5) . . . . ? 
C11 C12 C13 C14 1.1(5) . . . . ? 
C12 C13 C14 C15 -1.0(4) . . . . ? 
C11 C10 C15 C14 -0.1(4) . . . . ? 
P1 C10 C15 C14 -177.0(2) . . . . ? 
C13 C14 C15 C10 0.5(4) . . . . ? 
C10 P1 C16 C17 106.8(2) . . . . ? 
C9 P1 C16 C17 -140.0(2) . . . . ? 
Pt1 P1 C16 C17 -21.9(2) . . . . ? 
C10 P1 C16 C21 -71.2(2) . . . . ? 
C9 P1 C16 C21 42.1(2) . . . . ? 
Pt1 P1 C16 C21 160.07(17) . . . . ? 
C21 C16 C17 C18 1.3(4) . . . . ? 
P1 C16 C17 C18 -176.7(2) . . . . ? 
C16 C17 C18 C19 -1.4(4) . . . . ? 
C17 C18 C19 C20 0.2(4) . . . . ? 
C18 C19 C20 C21 1.2(4) . . . . ? 
C19 C20 C21 C16 -1.3(4) . . . . ? 
C17 C16 C21 C20 0.1(4) . . . . ? 
P1 C16 C21 C20 178.12(19) . . . . ? 
B3 C1 B2 C7 41.5(2) . . . . ? 
B6 C1 B2 C7 -101.1(2) . . . . ? 
B5 C1 B2 C7 -64.2(3) . . . . ? 
B4 C1 B2 C7 5.3(3) . . . . ? 
B3 C1 B2 B8 102.2(2) . . . . ? 
B6 C1 B2 B8 -40.34(19) . . . . ? 
B5 C1 B2 B8 -3.5(3) . . . . ? 
B4 C1 B2 B8 66.1(3) . . . . ? 
B3 C1 B2 B6 142.6(2) . . . . ? 
B5 C1 B2 B6 36.9(2) . . . . ? 
B4 C1 B2 B6 106.4(2) . . . . ? 
B6 C1 B2 B3 -142.6(2) . . . . ? 
B5 C1 B2 B3 -105.7(2) . . . . ? 
B4 C1 B2 B3 -36.1(2) . . . . ? 
B3 C7 B2 C1 -41.58(19) . . . . ? 
B8 C7 B2 C1 101.3(2) . . . . ? 
B12 C7 B2 C1 65.0(3) . . . . ? 
B11 C7 B2 C1 -5.4(3) . . . . ? 
B3 C7 B2 B8 -142.8(2) . . . . ? 
B12 C7 B2 B8 -36.2(2) . . . . ? 
B11 C7 B2 B8 -106.7(2) . . . . ? 
B3 C7 B2 B6 -102.4(2) . . . . ? 
B8 C7 B2 B6 40.5(2) . . . . ? 
B12 C7 B2 B6 4.2(3) . . . . ? 
B11 C7 B2 B6 -66.2(3) . . . . ? 
B8 C7 B2 B3 142.8(2) . . . . ? 
B12 C7 B2 B3 106.6(2) . . . . ? 
B11 C7 B2 B3 36.2(2) . . . . ? 
B2 C7 B3 C1 41.29(19) . . . . ? 
B8 C7 B3 C1 5.0(3) . . . . ? 
B12 C7 B3 C1 -65.6(3) . . . . ? 
B11 C7 B3 C1 -101.8(2) . . . . ? 
B2 C7 B3 B4 102.4(2) . . . . ? 
B8 C7 B3 B4 66.1(3) . . . . ? 
B12 C7 B3 B4 -4.4(3) . . . . ? 
B11 C7 B3 B4 -40.7(2) . . . . ? 
B2 C7 B3 B11 143.1(2) . . . . ? 
B8 C7 B3 B11 106.8(2) . . . . ? 
B12 C7 B3 B11 36.3(2) . . . . ? 
B8 C7 B3 B2 -36.3(2) . . . . ? 
B12 C7 B3 B2 -106.8(2) . . . . ? 
B11 C7 B3 B2 -143.1(2) . . . . ? 
B2 C1 B3 C7 -41.35(19) . . . . ? 
B6 C1 B3 C7 -4.7(3) . . . . ? 
B5 C1 B3 C7 65.1(3) . . . . ? 
B4 C1 B3 C7 101.3(2) . . . . ? 
B2 C1 B3 B4 -142.6(2) . . . . ? 
B6 C1 B3 B4 -105.9(3) . . . . ? 
B5 C1 B3 B4 -36.2(2) . . . . ? 
B2 C1 B3 B11 -102.0(2) . . . . ? 
B6 C1 B3 B11 -65.3(3) . . . . ? 
B5 C1 B3 B11 4.4(3) . . . . ? 
B4 C1 B3 B11 40.6(2) . . . . ? 
B6 C1 B3 B2 36.7(2) . . . . ? 
B5 C1 B3 B2 106.4(2) . . . . ? 
B4 C1 B3 B2 142.6(2) . . . . ? 
C1 B2 B3 C7 130.1(2) . . . . ? 
B8 B2 B3 C7 33.06(19) . . . . ? 
B6 B2 B3 C7 96.8(2) . . . . ? 
C7 B2 B3 C1 -130.1(2) . . . . ? 
B8 B2 B3 C1 -97.1(2) . . . . ? 
B6 B2 B3 C1 -33.3(2) . . . . ? 
C1 B2 B3 B4 33.5(2) . . . . ? 
C7 B2 B3 B4 -96.7(2) . . . . ? 
B8 B2 B3 B4 -63.6(3) . . . . ? 
B6 B2 B3 B4 0.1(3) . . . . ? 
C1 B2 B3 B11 97.3(2) . . . . ? 
C7 B2 B3 B11 -32.8(2) . . . . ? 
B8 B2 B3 B11 0.2(3) . . . . ? 
B6 B2 B3 B11 64.0(3) . . . . ? 
B2 C1 B4 B3 36.8(2) . . . . ? 
B6 C1 B4 B3 106.7(2) . . . . ? 
B5 C1 B4 B3 142.5(2) . . . . ? 
B2 C1 B4 B11 -3.5(3) . . . . ? 
B3 C1 B4 B11 -40.3(2) . . . . ? 
B6 C1 B4 B11 66.4(3) . . . . ? 
B5 C1 B4 B11 102.2(2) . . . . ? 
B2 C1 B4 B5 -105.7(2) . . . . ? 
B3 C1 B4 B5 -142.5(2) . . . . ? 
B6 C1 B4 B5 -35.8(2) . . . . ? 
B2 C1 B4 B10 -65.8(3) . . . . ? 
B3 C1 B4 B10 -102.6(2) . . . . ? 
B6 C1 B4 B10 4.1(3) . . . . ? 
B5 C1 B4 B10 39.9(2) . . . . ? 
C7 B3 B4 C1 -93.7(2) . . . . ? 
B11 B3 B4 C1 -133.8(2) . . . . ? 
B2 B3 B4 C1 -32.8(2) . . . . ? 
C7 B3 B4 B11 40.1(2) . . . . ? 
C1 B3 B4 B11 133.8(2) . . . . ? 
B2 B3 B4 B11 101.0(2) . . . . ? 
C7 B3 B4 B5 -60.6(3) . . . . ? 
C1 B3 B4 B5 33.1(2) . . . . ? 
B11 B3 B4 B5 -100.7(2) . . . . ? 
B2 B3 B4 B5 0.3(3) . . . . ? 
C7 B3 B4 B10 2.5(3) . . . . ? 
C1 B3 B4 B10 96.2(2) . . . . ? 
B11 B3 B4 B10 -37.6(2) . . . . ? 
B2 B3 B4 B10 63.4(3) . . . . ? 
B2 C1 B5 B9 3.1(3) . . . . ? 
B3 C1 B5 B9 -67.3(3) . . . . ? 
B6 C1 B5 B9 40.01(18) . . . . ? 
B4 C1 B5 B9 -103.3(2) . . . . ? 
B2 C1 B5 B10 66.1(3) . . . . ? 
B3 C1 B5 B10 -4.4(3) . . . . ? 
B6 C1 B5 B10 103.0(2) . . . . ? 
B4 C1 B5 B10 -40.3(2) . . . . ? 
B2 C1 B5 B4 106.4(2) . . . . ? 
B3 C1 B5 B4 35.9(2) . . . . ? 
B6 C1 B5 B4 143.3(2) . . . . ? 
B2 C1 B5 B6 -36.9(2) . . . . ? 
B3 C1 B5 B6 -107.3(2) . . . . ? 
B4 C1 B5 B6 -143.3(2) . . . . ? 
B3 B4 B5 C1 -33.0(2) . . . . ? 
B11 B4 B5 C1 -96.5(2) . . . . ? 
B10 B4 B5 C1 -134.0(2) . . . . ? 
C1 B4 B5 B9 95.8(2) . . . . ? 
B3 B4 B5 B9 62.8(3) . . . . ? 
B11 B4 B5 B9 -0.7(3) . . . . ? 
B10 B4 B5 B9 -38.2(2) . . . . ? 
C1 B4 B5 B10 134.0(2) . . . . ? 
B3 B4 B5 B10 101.0(3) . . . . ? 
B11 B4 B5 B10 37.5(2) . . . . ? 
C1 B4 B5 B6 32.5(2) . . . . ? 
B3 B4 B5 B6 -0.6(3) . . . . ? 
B11 B4 B5 B6 -64.0(3) . . . . ? 
B10 B4 B5 B6 -101.5(2) . . . . ? 
B2 C1 B6 B8 39.8(2) . . . . ? 
B3 C1 B6 B8 2.7(3) . . . . ? 
B5 C1 B6 B8 -102.2(2) . . . . ? 
B4 C1 B6 B8 -66.5(3) . . . . ? 
B3 C1 B6 B2 -37.0(2) . . . . ? 
B5 C1 B6 B2 -142.0(2) . . . . ? 
B4 C1 B6 B2 -106.2(2) . . . . ? 
B2 C1 B6 B9 101.9(2) . . . . ? 
B3 C1 B6 B9 64.9(3) . . . . ? 
B5 C1 B6 B9 -40.11(19) . . . . ? 
B4 C1 B6 B9 -4.4(3) . . . . ? 
B2 C1 B6 B5 142.0(2) . . . . ? 
B3 C1 B6 B5 105.0(2) . . . . ? 
B4 C1 B6 B5 35.8(2) . . . . ? 
C7 B2 B6 C1 94.0(2) . . . . ? 
B8 B2 B6 C1 134.0(2) . . . . ? 
B3 B2 B6 C1 33.0(2) . . . . ? 
C1 B2 B6 B8 -134.0(2) . . . . ? 
C7 B2 B6 B8 -39.93(19) . . . . ? 
B3 B2 B6 B8 -100.9(2) . . . . ? 
C1 B2 B6 B9 -96.6(2) . . . . ? 
C7 B2 B6 B9 -2.5(3) . . . . ? 
B8 B2 B6 B9 37.4(2) . . . . ? 
B3 B2 B6 B9 -63.5(3) . . . . ? 
C1 B2 B6 B5 -33.5(2) . . . . ? 
C7 B2 B6 B5 60.5(3) . . . . ? 
B8 B2 B6 B5 100.4(2) . . . . ? 
B3 B2 B6 B5 -0.5(3) . . . . ? 
B9 B5 B6 C1 -133.9(2) . . . . ? 
B10 B5 B6 C1 -96.6(2) . . . . ? 
B4 B5 B6 C1 -32.6(2) . . . . ? 
C1 B5 B6 B8 96.0(2) . . . . ? 
B9 B5 B6 B8 -37.84(19) . . . . ? 
B10 B5 B6 B8 -0.6(3) . . . . ? 
B4 B5 B6 B8 63.4(3) . . . . ? 
C1 B5 B6 B2 33.22(19) . . . . ? 
B9 B5 B6 B2 -100.6(2) . . . . ? 
B10 B5 B6 B2 -63.4(3) . . . . ? 
B4 B5 B6 B2 0.6(3) . . . . ? 
C1 B5 B6 B9 133.9(2) . . . . ? 
B10 B5 B6 B9 37.3(2) . . . . ? 
B4 B5 B6 B9 101.3(2) . . . . ? 
B3 C7 B8 B2 36.8(2) . . . . ? 
B12 C7 B8 B2 143.1(2) . . . . ? 
B11 C7 B8 B2 106.9(2) . . . . ? 
B2 C7 B8 B6 -40.4(2) . . . . ? 
B3 C7 B8 B6 -3.6(3) . . . . ? 
B12 C7 B8 B6 102.7(2) . . . . ? 
B11 C7 B8 B6 66.5(3) . . . . ? 
B2 C7 B8 B9 -102.6(2) . . . . ? 
B3 C7 B8 B9 -65.8(3) . . . . ? 
B12 C7 B8 B9 40.48(19) . . . . ? 
B11 C7 B8 B9 4.3(3) . . . . ? 
B2 C7 B8 B12 -143.1(2) . . . . ? 
B3 C7 B8 B12 -106.3(2) . . . . ? 
B11 C7 B8 B12 -36.2(2) . . . . ? 
C1 B2 B8 C7 -93.9(2) . . . . ? 
B6 B2 B8 C7 -133.8(2) . . . . ? 
B3 B2 B8 C7 -32.73(19) . . . . ? 
C1 B2 B8 B6 39.85(19) . . . . ? 
C7 B2 B8 B6 133.8(2) . . . . ? 
B3 B2 B8 B6 101.0(2) . . . . ? 
C1 B2 B8 B9 2.3(3) . . . . ? 
C7 B2 B8 B9 96.2(2) . . . . ? 
B6 B2 B8 B9 -37.53(19) . . . . ? 
B3 B2 B8 B9 63.5(2) . . . . ? 
C1 B2 B8 B12 -61.4(2) . . . . ? 
C7 B2 B8 B12 32.55(19) . . . . ? 
B6 B2 B8 B12 -101.2(2) . . . . ? 
B3 B2 B8 B12 -0.2(3) . . . . ? 
C1 B6 B8 C7 0.5(3) . . . . ? 
B2 B6 B8 C7 39.53(19) . . . . ? 
B9 B6 B8 C7 -98.5(2) . . . . ? 
B5 B6 B8 C7 -60.8(3) . . . . ? 
C1 B6 B8 B2 -39.04(19) . . . . ? 
B9 B6 B8 B2 -138.1(2) . . . . ? 
B5 B6 B8 B2 -100.3(2) . . . . ? 
C1 B6 B8 B9 99.0(2) . . . . ? 
B2 B6 B8 B9 138.1(2) . . . . ? 
B5 B6 B8 B9 37.8(2) . . . . ? 
C1 B6 B8 B12 61.6(3) . . . . ? 
B2 B6 B8 B12 100.6(2) . . . . ? 
B9 B6 B8 B12 -37.4(2) . . . . ? 
B5 B6 B8 B12 0.3(3) . . . . ? 
C7 B8 B9 B6 98.7(2) . . . . ? 
B2 B8 B9 B6 37.61(19) . . . . ? 
B12 B8 B9 B6 138.3(2) . . . . ? 
C7 B8 B9 B5 60.6(2) . . . . ? 
B2 B8 B9 B5 -0.5(3) . . . . ? 
B6 B8 B9 B5 -38.1(2) . . . . ? 
B12 B8 B9 B5 100.2(2) . . . . ? 
C7 B8 B9 B12 -39.60(19) . . . . ? 
B2 B8 B9 B12 -100.7(2) . . . . ? 
B6 B8 B9 B12 -138.3(2) . . . . ? 
C7 B8 B9 B10 -2.7(3) . . . . ? 
B2 B8 B9 B10 -63.8(3) . . . . ? 
B6 B8 B9 B10 -101.4(2) . . . . ? 
B12 B8 B9 B10 36.9(2) . . . . ? 
C7 B8 B9 S1 -144.62(18) . . . . ? 
B2 B8 B9 S1 154.28(18) . . . . ? 
B6 B8 B9 S1 116.7(2) . . . . ? 
B12 B8 B9 S1 -105.0(2) . . . . ? 
C1 B6 B9 B8 -97.9(2) . . . . ? 
B2 B6 B9 B8 -37.2(2) . . . . ? 
B5 B6 B9 B8 -137.5(2) . . . . ? 
C1 B6 B9 B5 39.61(18) . . . . ? 
B8 B6 B9 B5 137.5(2) . . . . ? 
B2 B6 B9 B5 100.3(2) . . . . ? 
C1 B6 B9 B12 -60.4(3) . . . . ? 
B8 B6 B9 B12 37.4(2) . . . . ? 
B2 B6 B9 B12 0.2(3) . . . . ? 
B5 B6 B9 B12 -100.1(2) . . . . ? 
C1 B6 B9 B10 2.8(2) . . . . ? 
B8 B6 B9 B10 100.6(2) . . . . ? 
B2 B6 B9 B10 63.4(3) . . . . ? 
B5 B6 B9 B10 -36.85(19) . . . . ? 
C1 B6 B9 S1 157.17(19) . . . . ? 
B8 B6 B9 S1 -104.9(2) . . . . ? 
B2 B6 B9 S1 -142.2(2) . . . . ? 
B5 B6 B9 S1 117.6(2) . . . . ? 
C1 B5 B9 B8 -1.4(3) . . . . ? 
B10 B5 B9 B8 -100.9(2) . . . . ? 
B4 B5 B9 B8 -62.9(3) . . . . ? 
B6 B5 B9 B8 37.95(19) . . . . ? 
C1 B5 B9 B6 -39.39(19) . . . . ? 
B10 B5 B9 B6 -138.9(2) . . . . ? 
B4 B5 B9 B6 -100.8(2) . . . . ? 
C1 B5 B9 B12 62.1(3) . . . . ? 
B10 B5 B9 B12 -37.4(2) . . . . ? 
B4 B5 B9 B12 0.7(3) . . . . ? 
B6 B5 B9 B12 101.5(2) . . . . ? 
C1 B5 B9 B10 99.5(2) . . . . ? 
B4 B5 B9 B10 38.0(2) . . . . ? 
B6 B5 B9 B10 138.9(2) . . . . ? 
C1 B5 B9 S1 -153.1(2) . . . . ? 
B10 B5 B9 S1 107.5(2) . . . . ? 
B4 B5 B9 S1 145.5(2) . . . . ? 
B6 B5 B9 S1 -113.7(2) . . . . ? 
C8 S1 B9 B8 -172.95(18) . . . . ? 
Pt1 S1 B9 B8 -61.07(19) . . . . ? 
C8 S1 B9 B6 -101.4(2) . . . . ? 
Pt1 S1 B9 B6 10.5(2) . . . . ? 
C8 S1 B9 B5 -23.8(3) . . . . ? 
Pt1 S1 B9 B5 88.1(2) . . . . ? 
C8 S1 B9 B12 118.6(2) . . . . ? 
Pt1 S1 B9 B12 -129.49(17) . . . . ? 
C8 S1 B9 B10 50.1(2) . . . . ? 
Pt1 S1 B9 B10 162.01(17) . . . . ? 
C1 B5 B10 B12 -60.7(3) . . . . ? 
B9 B5 B10 B12 37.5(2) . . . . ? 
B4 B5 B10 B12 -100.3(2) . . . . ? 
B6 B5 B10 B12 0.6(3) . . . . ? 
C1 B5 B10 B11 2.5(3) . . . . ? 
B9 B5 B10 B11 100.7(2) . . . . ? 
B4 B5 B10 B11 -37.1(2) . . . . ? 
B6 B5 B10 B11 63.8(3) . . . . ? 
C1 B5 B10 B4 39.6(2) . . . . ? 
B9 B5 B10 B4 137.8(2) . . . . ? 
B6 B5 B10 B4 100.9(2) . . . . ? 
C1 B5 B10 B9 -98.2(2) . . . . ? 
B4 B5 B10 B9 -137.8(2) . . . . ? 
B6 B5 B10 B9 -36.9(2) . . . . ? 
C1 B4 B10 B5 -39.4(2) . . . . ? 
B3 B4 B10 B5 -100.5(2) . . . . ? 
B11 B4 B10 B5 -138.0(2) . . . . ? 
C1 B4 B10 B12 61.0(3) . . . . ? 
B3 B4 B10 B12 0.0(3) . . . . ? 
B11 B4 B10 B12 -37.6(2) . . . . ? 
B5 B4 B10 B12 100.4(2) . . . . ? 
C1 B4 B10 B11 98.7(2) . . . . ? 
B3 B4 B10 B11 37.6(2) . . . . ? 
B5 B4 B10 B11 138.0(2) . . . . ? 
C1 B4 B10 B9 -2.0(3) . . . . ? 
B3 B4 B10 B9 -63.1(3) . . . . ? 
B11 B4 B10 B9 -100.7(2) . . . . ? 
B5 B4 B10 B9 37.37(19) . . . . ? 
B8 B9 B10 B5 100.7(2) . . . . ? 
B6 B9 B10 B5 37.11(19) . . . . ? 
B12 B9 B10 B5 137.8(2) . . . . ? 
S1 B9 B10 B5 -118.7(2) . . . . ? 
B8 B9 B10 B12 -37.2(2) . . . . ? 
B6 B9 B10 B12 -100.7(2) . . . . ? 
B5 B9 B10 B12 -137.8(2) . . . . ? 
S1 B9 B10 B12 103.5(2) . . . . ? 
B8 B9 B10 B11 0.5(3) . . . . ? 
B6 B9 B10 B11 -63.1(3) . . . . ? 
B5 B9 B10 B11 -100.2(2) . . . . ? 
B12 B9 B10 B11 37.7(2) . . . . ? 
S1 B9 B10 B11 141.2(2) . . . . ? 
B8 B9 B10 B4 63.1(3) . . . . ? 
B6 B9 B10 B4 -0.5(3) . . . . ? 
B5 B9 B10 B4 -37.6(2) . . . . ? 
B12 B9 B10 B4 100.3(2) . . . . ? 
S1 B9 B10 B4 -156.23(18) . . . . ? 
B2 C7 B11 B3 -36.6(2) . . . . ? 
B8 C7 B11 B3 -106.6(2) . . . . ? 
B12 C7 B11 B3 -142.9(2) . . . . ? 
B2 C7 B11 B4 3.6(3) . . . . ? 
B3 C7 B11 B4 40.1(2) . . . . ? 
B8 C7 B11 B4 -66.5(3) . . . . ? 
B12 C7 B11 B4 -102.8(2) . . . . ? 
B2 C7 B11 B12 106.3(2) . . . . ? 
B3 C7 B11 B12 142.9(2) . . . . ? 
B8 C7 B11 B12 36.3(2) . . . . ? 
B2 C7 B11 B10 66.1(3) . . . . ? 
B3 C7 B11 B10 102.6(2) . . . . ? 
B8 C7 B11 B10 -4.0(3) . . . . ? 
B12 C7 B11 B10 -40.3(2) . . . . ? 
C1 B3 B11 C7 93.3(2) . . . . ? 
B4 B3 B11 C7 133.5(2) . . . . ? 
B2 B3 B11 C7 32.43(19) . . . . ? 
C7 B3 B11 B4 -133.5(2) . . . . ? 
C1 B3 B11 B4 -40.2(2) . . . . ? 
B2 B3 B11 B4 -101.1(2) . . . . ? 
C7 B3 B11 B12 -32.65(19) . . . . ? 
C1 B3 B11 B12 60.6(3) . . . . ? 
B4 B3 B11 B12 100.9(2) . . . . ? 
B2 B3 B11 B12 -0.2(3) . . . . ? 
C7 B3 B11 B10 -95.8(2) . . . . ? 
C1 B3 B11 B10 -2.6(3) . . . . ? 
B4 B3 B11 B10 37.7(2) . . . . ? 
B2 B3 B11 B10 -63.4(3) . . . . ? 
C1 B4 B11 C7 0.0(3) . . . . ? 
B3 B4 B11 C7 -39.5(2) . . . . ? 
B5 B4 B11 C7 61.2(3) . . . . ? 
B10 B4 B11 C7 98.6(2) . . . . ? 
C1 B4 B11 B3 39.5(2) . . . . ? 
B5 B4 B11 B3 100.7(2) . . . . ? 
B10 B4 B11 B3 138.1(2) . . . . ? 
C1 B4 B11 B12 -60.9(3) . . . . ? 
B3 B4 B11 B12 -100.3(2) . . . . ? 
B5 B4 B11 B12 0.4(3) . . . . ? 
B10 B4 B11 B12 37.7(2) . . . . ? 
C1 B4 B11 B10 -98.6(2) . . . . ? 
B3 B4 B11 B10 -138.1(2) . . . . ? 
B5 B4 B11 B10 -37.3(2) . . . . ? 
B5 B10 B11 C7 -60.8(3) . . . . ? 
B12 B10 B11 C7 39.5(2) . . . . ? 
B4 B10 B11 C7 -98.1(2) . . . . ? 
B9 B10 B11 C7 1.9(3) . . . . ? 
B5 B10 B11 B3 0.0(3) . . . . ? 
B12 B10 B11 B3 100.4(2) . . . . ? 
B4 B10 B11 B3 -37.3(2) . . . . ? 
B9 B10 B11 B3 62.8(3) . . . . ? 
B5 B10 B11 B4 37.3(2) . . . . ? 
B12 B10 B11 B4 137.7(2) . . . . ? 
B9 B10 B11 B4 100.1(2) . . . . ? 
B5 B10 B11 B12 -100.3(2) . . . . ? 
B4 B10 B11 B12 -137.7(2) . . . . ? 
B9 B10 B11 B12 -37.6(2) . . . . ? 
B2 C7 B12 B10 -66.7(3) . . . . ? 
B3 C7 B12 B10 4.4(3) . . . . ? 
B8 C7 B12 B10 -102.6(2) . . . . ? 
B11 C7 B12 B10 40.54(19) . . . . ? 
B2 C7 B12 B11 -107.2(2) . . . . ? 
B3 C7 B12 B11 -36.2(2) . . . . ? 
B8 C7 B12 B11 -143.2(2) . . . . ? 
B2 C7 B12 B9 -4.1(3) . . . . ? 
B3 C7 B12 B9 67.0(3) . . . . ? 
B8 C7 B12 B9 -40.02(19) . . . . ? 
B11 C7 B12 B9 103.1(2) . . . . ? 
B2 C7 B12 B8 36.0(2) . . . . ? 
B3 C7 B12 B8 107.0(2) . . . . ? 
B11 C7 B12 B8 143.2(2) . . . . ? 
B5 B10 B12 C7 60.7(3) . . . . ? 
B11 B10 B12 C7 -39.80(19) . . . . ? 
B4 B10 B12 C7 -2.4(3) . . . . ? 
B9 B10 B12 C7 98.0(2) . . . . ? 
B5 B10 B12 B11 100.5(2) . . . . ? 
B4 B10 B12 B11 37.4(2) . . . . ? 
B9 B10 B12 B11 137.8(2) . . . . ? 
B5 B10 B12 B9 -37.3(2) . . . . ? 
B11 B10 B12 B9 -137.8(2) . . . . ? 
B4 B10 B12 B9 -100.4(2) . . . . ? 
B5 B10 B12 B8 -0.4(3) . . . . ? 
B11 B10 B12 B8 -100.9(2) . . . . ? 
B4 B10 B12 B8 -63.5(3) . . . . ? 
B9 B10 B12 B8 36.9(2) . . . . ? 
B3 B11 B12 C7 32.62(19) . . . . ? 
B4 B11 B12 C7 95.5(2) . . . . ? 
B10 B11 B12 C7 133.5(2) . . . . ? 
C7 B11 B12 B10 -133.5(2) . . . . ? 
B3 B11 B12 B10 -100.9(2) . . . . ? 
B4 B11 B12 B10 -38.0(2) . . . . ? 
C7 B11 B12 B9 -95.5(2) . . . . ? 
B3 B11 B12 B9 -62.9(3) . . . . ? 
B4 B11 B12 B9 0.0(3) . . . . ? 
B10 B11 B12 B9 38.0(2) . . . . ? 
C7 B11 B12 B8 -32.52(19) . . . . ? 
B3 B11 B12 B8 0.1(3) . . . . ? 
B4 B11 B12 B8 63.0(3) . . . . ? 
B10 B11 B12 B8 101.0(2) . . . . ? 
B8 B9 B12 C7 39.5(2) . . . . ? 
B6 B9 B12 C7 2.2(3) . . . . ? 
B5 B9 B12 C7 -61.6(3) . . . . ? 
B10 B9 B12 C7 -99.1(2) . . . . ? 
S1 B9 B12 C7 148.65(19) . . . . ? 
B8 B9 B12 B10 138.6(2) . . . . ? 
B6 B9 B12 B10 101.3(2) . . . . ? 
B5 B9 B12 B10 37.4(2) . . . . ? 
S1 B9 B12 B10 -112.3(2) . . . . ? 
B8 B9 B12 B11 100.7(2) . . . . ? 
B6 B9 B12 B11 63.4(3) . . . . ? 
B5 B9 B12 B11 -0.4(3) . . . . ? 
B10 B9 B12 B11 -37.9(2) . . . . ? 
S1 B9 B12 B11 -150.15(19) . . . . ? 
B6 B9 B12 B8 -37.3(2) . . . . ? 
B5 B9 B12 B8 -101.1(2) . . . . ? 
B10 B9 B12 B8 -138.6(2) . . . . ? 
S1 B9 B12 B8 109.2(2) . . . . ? 
B2 B8 B12 C7 -32.57(19) . . . . ? 
B6 B8 B12 C7 -96.3(2) . . . . ? 
B9 B8 B12 C7 -133.6(2) . . . . ? 
C7 B8 B12 B10 96.3(2) . . . . ? 
B2 B8 B12 B10 63.7(3) . . . . ? 
B6 B8 B12 B10 0.0(3) . . . . ? 
B9 B8 B12 B10 -37.3(2) . . . . ? 
C7 B8 B12 B11 32.61(19) . . . . ? 
B2 B8 B12 B11 0.0(3) . . . . ? 
B6 B8 B12 B11 -63.6(3) . . . . ? 
B9 B8 B12 B11 -101.0(2) . . . . ? 
C7 B8 B12 B9 133.6(2) . . . . ? 
B2 B8 B12 B9 101.0(2) . . . . ? 
B6 B8 B12 B9 37.3(2) . . . . ? 
  
_diffrn_measured_fraction_theta_max    0.996 
_diffrn_reflns_theta_full              30.55 
_diffrn_measured_fraction_theta_full   0.996 
_refine_diff_density_max    1.370 
_refine_diff_density_min   -1.248 
_refine_diff_density_rms    0.134 
