# Supplementary material for: A coordination chemistry dichotomy for icosahedral carborane-based ligands
Source: Springer Nature journal article supplement (doi:10.1038/nchem.1088), 2011-07-21
Supplement: 41557_2011_BFnchem1088_MOESM33_ESM.mol [file 41557_2011_BFnchem1088_MOESM33_ESM.mol]

  ChemDraw07181117182D

 42 61  0  0  0  0  0  0  0  0999 V2000
   -2.9170    0.3148    0.0000 Pt  0  0  0  0  0  0  0  0  0  0  0  0
   -2.4581   -0.3707    0.0000 Cl  0  0  0  0  0  0  0  0  0  0  0  0
   -2.3968    0.9625    0.0000 Cl  0  0  0  0  0  0  0  0  0  0  0  0
   -2.6876   -1.4592    0.0000 C   0  0  0  0  0  0  0  0  0  0  0  0
   -3.3538   -0.9773    0.0000 C   0  0  0  0  0  0  0  0  0  0  0  0
   -4.1042   -1.3133    0.0000 P   0  0  0  0  0  0  0  0  0  0  0  0
   -4.7704   -0.8314    0.0000 C   0  0  0  0  0  0  0  0  0  0  0  0
   -4.1885   -2.1312    0.0000 C   0  0  0  0  0  0  0  0  0  0  0  0
   -4.6859   -0.0108    0.0000 C   0  0  0  0  0  0  0  0  0  0  0  0
   -5.3544    0.4727    0.0000 C   0  0  0  0  0  0  0  0  0  0  0  0
   -6.1074    0.1356    0.0000 C   0  0  0  0  0  0  0  0  0  0  0  0
   -6.1919   -0.6851    0.0000 C   0  0  0  0  0  0  0  0  0  0  0  0
   -5.5234   -1.1686    0.0000 C   0  0  0  0  0  0  0  0  0  0  0  0
   -4.9414   -2.4684    0.0000 C   0  0  0  0  0  0  0  0  0  0  0  0
   -5.0259   -3.2890    0.0000 C   0  0  0  0  0  0  0  0  0  0  0  0
   -4.3575   -3.7726    0.0000 C   0  0  0  0  0  0  0  0  0  0  0  0
   -3.6045   -3.4354    0.0000 C   0  0  0  0  0  0  0  0  0  0  0  0
   -3.5200   -2.6148    0.0000 C   0  0  0  0  0  0  0  0  0  0  0  0
    0.6181   -0.5325    0.0000 B   0  0  0  0  0  0  0  0  0  0  0  0
    0.6727   -1.9063    0.0000 B   0  0  0  0  0  0  0  0  0  0  0  0
    1.8898   -2.5459    0.0000 B   0  0  0  0  0  0  0  0  0  0  0  0
    3.0522   -1.8117    0.0000 C   0  0  0  0  0  0  0  0  0  0  0  0
    2.9976   -0.4379    0.0000 B   0  0  0  0  0  0  0  0  0  0  0  0
    1.7805    0.2017    0.0000 C   0  0  0  0  0  0  0  0  0  0  0  0
    1.6739    2.9510    0.0000 B   0  0  0  0  0  0  0  0  0  0  0  0
   -1.6178   -3.3255    0.0000 B   0  0  0  0  0  0  0  0  0  0  0  0
    5.4637   -3.0379    0.0000 B   0  0  0  0  0  0  0  0  0  0  0  0
    1.2560   -0.8467    0.0000 B   0  0  0  0  0  0  0  0  0  0  0  0
    2.4330   -0.7970    0.0000 B   0  0  0  0  0  0  0  0  0  0  0  0
    1.8366   -1.7615    0.0000 B   0  0  0  0  0  0  0  0  0  0  0  0
   -1.9061   -1.2035    0.0000 S   0  0  0  0  0  0  0  0  0  0  0  0
    1.6405    3.7726    0.0000 H   0  0  0  0  0  0  0  0  0  0  0  0
    6.1919   -3.4198    0.0000 H   0  0  0  0  0  0  0  0  0  0  0  0
   -2.3126   -3.7652    0.0000 H   0  0  0  0  0  0  0  0  0  0  0  0
   -0.1095   -0.1494    0.0000 H   0  0  0  0  0  0  0  0  0  0  0  0
    0.9937   -0.0674    0.0000 H   0  0  0  0  0  0  0  0  0  0  0  0
    2.4759    0.6405    0.0000 H   0  0  0  0  0  0  0  0  0  0  0  0
    3.6917    0.0028    0.0000 H   0  0  0  0  0  0  0  0  0  0  0  0
    2.6066    0.0066    0.0000 H   0  0  0  0  0  0  0  0  0  0  0  0
    3.7444   -1.3679    0.0000 H   0  0  0  0  0  0  0  0  0  0  0  0
    1.3134   -2.3958    0.0000 H   0  0  0  0  0  0  0  0  0  0  0  0
    1.9235   -3.3674    0.0000 H   0  0  0  0  0  0  0  0  0  0  0  0
  1  2  1  0      
  3  1  1  0      
 31  4  1  0      
  4  5  1  0      
  5  6  1  0      
  6  7  1  0      
  6  8  1  0      
  7  9  2  0      
  9 10  1  0      
 10 11  2  0      
 11 12  1  0      
 12 13  2  0      
 13  7  1  0      
  8 14  2  0      
 14 15  1  0      
 15 16  2  0      
 16 17  1  0      
 17 18  2  0      
 18  8  1  0      
 31 20  1  0      
 19 20  1  0      
 20 21  1  0      
 21 22  1  0      
 22 23  1  0      
 23 24  1  0      
 24 19  1  0      
 25 26  1  0      
 26 27  1  0      
 27 25  1  0      
 19 26  1  0      
 20 26  1  0      
 21 26  1  0      
 22 27  1  0      
 24 25  1  0      
 19 25  1  0      
 23 25  1  0      
 23 27  1  0      
 21 27  1  0      
 24 28  1  0      
 20 28  1  0      
 19 28  1  0      
 22 29  1  0      
 29 30  1  0      
 30 22  1  0      
 28 29  1  0      
 30 28  1  0      
 23 29  1  0      
 30 21  1  0      
 30 20  1  0      
 29 24  1  0      
 25 32  1  0      
 27 33  1  0      
 26 34  1  0      
 19 35  1  0      
 28 36  1  0      
 24 37  1  0      
 23 38  1  0      
 29 39  1  0      
 22 40  1  0      
 30 41  1  0      
 21 42  1  0      
M  END
