# Supplementary material for: A coordination chemistry dichotomy for icosahedral carborane-based ligands
Source: Springer Nature journal article supplement (doi:10.1038/nchem.1088), 2011-07-21
Supplement: 41557_2011_BFnchem1088_MOESM75_ESM.cif [file 41557_2011_BFnchem1088_MOESM75_ESM.cif]

 
data_n0280 
  
_audit_creation_method            SHELXL-97 
_chemical_name_systematic 
; 
 ? 
; 
_chemical_name_common             ? 
_chemical_melting_point           ? 
_chemical_formula_moiety        
 'C32 H50 B20 P2 Pt S2, 2(B F4)' 
_chemical_formula_sum 
 'C32 H50 B22 F8 P2 Pt S2' 
_chemical_formula_weight          1145.69 
  
loop_ 
 _atom_type_symbol 
 _atom_type_description 
 _atom_type_scat_dispersion_real 
 _atom_type_scat_dispersion_imag 
 _atom_type_scat_source 
 'C'  'C'   0.0181   0.0091 
 'International Tables Vol C Tables 4.2.6.8 and 6.1.1.4' 
 'H'  'H'   0.0000   0.0000 
 'International Tables Vol C Tables 4.2.6.8 and 6.1.1.4' 
 'B'  'B'   0.0090   0.0039 
 'International Tables Vol C Tables 4.2.6.8 and 6.1.1.4' 
 'P'  'P'   0.2955   0.4335 
 'International Tables Vol C Tables 4.2.6.8 and 6.1.1.4' 
 'S'  'S'   0.3331   0.5567 
 'International Tables Vol C Tables 4.2.6.8 and 6.1.1.4' 
 'Pt'  'Pt'  -4.5932   6.9264 
 'International Tables Vol C Tables 4.2.6.8 and 6.1.1.4' 
 'F'  'F'   0.0727   0.0534 
 'International Tables Vol C Tables 4.2.6.8 and 6.1.1.4' 
  
_symmetry_cell_setting            Monoclinic 
_symmetry_space_group_name_H-M    P2(1)/n 
  
loop_ 
 _symmetry_equiv_pos_as_xyz 
 'x, y, z' 
 '-x+1/2, y+1/2, -z+1/2' 
 '-x, -y, -z' 
 'x-1/2, -y-1/2, z-1/2' 
  
_cell_length_a                    13.2738(6) 
_cell_length_b                    18.9981(8) 
_cell_length_c                    19.6952(9) 
_cell_angle_alpha                 90.00 
_cell_angle_beta                  105.576(3) 
_cell_angle_gamma                 90.00 
_cell_volume                      4784.3(4) 
_cell_formula_units_Z             4 
_cell_measurement_temperature     100(2) 
_cell_measurement_reflns_used     4613 
_cell_measurement_theta_min       3.29 
_cell_measurement_theta_max       57.38 
  
_exptl_crystal_description        plate 
_exptl_crystal_colour             colourless 
_exptl_crystal_size_max           0.16 
_exptl_crystal_size_mid           0.14 
_exptl_crystal_size_min           0.01 
_exptl_crystal_density_meas       ? 
_exptl_crystal_density_diffrn     1.591 
_exptl_crystal_density_method     'not measured' 
_exptl_crystal_F_000              2256 
_exptl_absorpt_coefficient_mu     7.433 
_exptl_absorpt_correction_type    numerical 
_exptl_absorpt_correction_T_min   0.5879
_exptl_absorpt_correction_T_max   0.9117
_exptl_absorpt_process_details    'face-indexed' 
  
_exptl_special_details 
; 
 ? 
; 
  
_diffrn_ambient_temperature       100(2) 
_diffrn_radiation_wavelength      1.54178 
_diffrn_radiation_type            CuK\a 
_diffrn_radiation_source          'fine-focus sealed tube' 
_diffrn_radiation_monochromator   graphite 
_diffrn_measurement_device_type   'Bruker APEX-II CCD' 
_diffrn_measurement_method        '\f and \w scans' 
_diffrn_detector_area_resol_mean  ? 
_diffrn_standards_number          0 
_diffrn_standards_interval_count  ? 
_diffrn_standards_interval_time   ? 
_diffrn_standards_decay_%         ?
_diffrn_reflns_number             19314 
_diffrn_reflns_av_R_equivalents   0.0918 
_diffrn_reflns_av_sigmaI/netI     0.1018 
_diffrn_reflns_limit_h_min        -14 
_diffrn_reflns_limit_h_max        14 
_diffrn_reflns_limit_k_min        -20 
_diffrn_reflns_limit_k_max        12 
_diffrn_reflns_limit_l_min        -20 
_diffrn_reflns_limit_l_max        21 
_diffrn_reflns_theta_min          3.29 
_diffrn_reflns_theta_max          58.24 
_reflns_number_total              6621 
_reflns_number_gt                 4619 
_reflns_threshold_expression      >2sigma(I) 
  
_computing_data_collection        'Bruker APEX2' 
_computing_cell_refinement        'Bruker SAINT' 
_computing_data_reduction         'Bruker SAINT' 
_computing_structure_solution     'SHELXS-97 (Sheldrick, 2008)' 
_computing_structure_refinement   'SHELXL-97 (Sheldrick, 2008)' 
_computing_molecular_graphics     'Bruker SHELXTL' 
_computing_publication_material   'Bruker SHELXTL' 
  
_refine_special_details 
; 
 Refinement of F^2^ against ALL reflections.  The weighted R-factor wR and 
 goodness of fit S are based on F^2^, conventional R-factors R are based 
 on F, with F set to zero for negative F^2^. The threshold expression of 
 F^2^ > 2sigma(F^2^) is used only for calculating R-factors(gt) etc. and is 
 not relevant to the choice of reflections for refinement.  R-factors based 
 on F^2^ are statistically about twice as large as those based on F, and R- 
 factors based on ALL data will be even larger. 

 The disordered fluorine atoms were refined with a group anisotropic
 displacement parameter.
; 
  
_refine_ls_structure_factor_coef  Fsqd 
_refine_ls_matrix_type            full 
_refine_ls_weighting_scheme       calc 
_refine_ls_weighting_details 
 'calc w=1/[\s^2^(Fo^2^)+(0.0441P)^2^+0.0000P] where P=(Fo^2^+2Fc^2^)/3' 
_atom_sites_solution_primary      direct 
_atom_sites_solution_secondary    difmap 
_atom_sites_solution_hydrogens    geom 
_refine_ls_hydrogen_treatment     constr
_refine_ls_extinction_method      none 
_refine_ls_extinction_coef        ? 
_refine_ls_number_reflns          6621 
_refine_ls_number_parameters      602 
_refine_ls_number_restraints      0 
_refine_ls_R_factor_all           0.0862 
_refine_ls_R_factor_gt            0.0499 
_refine_ls_wR_factor_ref          0.1144 
_refine_ls_wR_factor_gt           0.1013 
_refine_ls_goodness_of_fit_ref    1.019 
_refine_ls_restrained_S_all       1.019 
_refine_ls_shift/su_max           0.001 
_refine_ls_shift/su_mean          0.000 
  
loop_ 
 _atom_site_label 
 _atom_site_type_symbol 
 _atom_site_fract_x 
 _atom_site_fract_y 
 _atom_site_fract_z 
 _atom_site_U_iso_or_equiv 
 _atom_site_adp_type 
 _atom_site_occupancy 
 _atom_site_symmetry_multiplicity 
 _atom_site_calc_flag 
 _atom_site_refinement_flags 
 _atom_site_disorder_assembly 
 _atom_site_disorder_group 
Pt1 Pt 0.53350(3) 0.712479(19) 0.642945(18) 0.02070(14) Uani 1 1 d . . . 
S1 S 0.54431(16) 0.61495(11) 0.56950(11) 0.0247(5) Uani 1 1 d . . . 
S2 S 0.60489(16) 0.64525(11) 0.74650(11) 0.0232(5) Uani 1 1 d . . . 
P1 P 0.48456(16) 0.77442(12) 0.54102(11) 0.0218(5) Uani 1 1 d . . . 
P2 P 0.51646(16) 0.79798(11) 0.71843(11) 0.0210(5) Uani 1 1 d . . . 
F1 F 0.5425(4) 0.8651(3) -0.0249(3) 0.0433(14) Uani 1 1 d . A . 
F2 F 0.6247(6) 0.7699(4) -0.0485(4) 0.0590(14) Uani 0.833(7) 1 d P A 1 
F3 F 0.7115(6) 0.8368(4) 0.0392(4) 0.0590(14) Uani 0.833(7) 1 d P A 1 
F4 F 0.5743(5) 0.7724(4) 0.0521(4) 0.0590(14) Uani 0.833(7) 1 d P A 1 
F5 F 0.1661(4) 0.1895(3) 0.2660(3) 0.0566(17) Uani 1 1 d . . . 
F6 F 0.0287(4) 0.2572(4) 0.2638(3) 0.085(2) Uani 1 1 d . . . 
F7 F 0.0228(4) 0.1855(3) 0.1731(2) 0.0370(13) Uani 1 1 d . . . 
F8 F 0.1302(4) 0.2801(3) 0.1908(3) 0.0513(15) Uani 1 1 d . . . 
F2A F 0.688(3) 0.816(2) -0.028(2) 0.0590(14) Uani 0.167(7) 1 d P A 2 
F3A F 0.672(3) 0.843(2) 0.066(2) 0.0590(14) Uani 0.167(7) 1 d P A 2 
F4A F 0.571(3) 0.747(2) -0.0270(19) 0.0590(14) Uani 0.167(7) 1 d P A 2 
C1 C 0.8841(6) 0.6207(5) 0.5708(4) 0.025(2) Uani 1 1 d . . . 
H1B H 0.9413 0.6629 0.5672 0.030 Uiso 1 1 calc R . . 
C7 C 0.8143(7) 0.4929(5) 0.5381(5) 0.030(2) Uani 1 1 d . . . 
H7B H 0.8212 0.4423 0.5105 0.036 Uiso 1 1 calc R . . 
C1' C 0.4624(7) 0.4367(5) 0.7668(5) 0.031(2) Uani 1 1 d . . . 
H1'B H 0.4853 0.3811 0.7592 0.038 Uiso 1 1 calc R . . 
C7' C 0.3126(7) 0.5287(4) 0.7552(4) 0.026(2) Uani 1 1 d . . . 
H7'B H 0.2267 0.5403 0.7395 0.031 Uiso 1 1 calc R . . 
C20 C 0.4991(6) 0.6487(4) 0.4778(4) 0.023(2) Uani 1 1 d . . . 
H20A H 0.5596 0.6657 0.4620 0.027 Uiso 1 1 calc R . . 
H20B H 0.4646 0.6105 0.4457 0.027 Uiso 1 1 calc R . . 
C21 C 0.4218(6) 0.7092(4) 0.4752(4) 0.028(2) Uani 1 1 d . . . 
H21A H 0.3574 0.6913 0.4854 0.034 Uiso 1 1 calc R . . 
H21B H 0.4025 0.7308 0.4277 0.034 Uiso 1 1 calc R . . 
C22 C 0.6183(7) 0.7071(4) 0.8205(4) 0.028(2) Uani 1 1 d . . . 
H22A H 0.5572 0.7023 0.8400 0.033 Uiso 1 1 calc R . . 
H22B H 0.6818 0.6952 0.8584 0.033 Uiso 1 1 calc R . . 
C23 C 0.6259(6) 0.7825(4) 0.7971(4) 0.027(2) Uani 1 1 d . . . 
H23A H 0.6934 0.7901 0.7857 0.032 Uiso 1 1 calc R . . 
H23B H 0.6218 0.8155 0.8351 0.032 Uiso 1 1 calc R . . 
C24 C 0.5997(6) 0.8043(4) 0.5168(4) 0.017(2) Uani 1 1 d . . . 
C25 C 0.6931(7) 0.8120(4) 0.5683(5) 0.026(2) Uani 1 1 d . . . 
H25 H 0.6956 0.8041 0.6164 0.031 Uiso 1 1 calc R . . 
C26 C 0.7836(7) 0.8312(4) 0.5501(5) 0.027(2) Uani 1 1 d . . . 
H26 H 0.8477 0.8363 0.5856 0.032 Uiso 1 1 calc R . . 
C27 C 0.7798(7) 0.8427(4) 0.4814(5) 0.032(2) Uani 1 1 d . . . 
H27 H 0.8421 0.8554 0.4694 0.039 Uiso 1 1 calc R . . 
C28 C 0.6876(7) 0.8363(4) 0.4286(5) 0.031(2) Uani 1 1 d . . . 
H28 H 0.6861 0.8451 0.3808 0.037 Uiso 1 1 calc R . . 
C29 C 0.5978(7) 0.8169(4) 0.4465(4) 0.027(2) Uani 1 1 d . . . 
H29 H 0.5340 0.8121 0.4107 0.032 Uiso 1 1 calc R . . 
C30 C 0.3927(6) 0.8458(4) 0.5280(4) 0.021(2) Uani 1 1 d . . . 
C31 C 0.4171(7) 0.9137(4) 0.5083(4) 0.025(2) Uani 1 1 d . . . 
H31 H 0.4850 0.9236 0.5035 0.030 Uiso 1 1 calc R . . 
C32 C 0.3418(7) 0.9656(5) 0.4961(4) 0.030(2) Uani 1 1 d . . . 
H32 H 0.3577 1.0111 0.4820 0.036 Uiso 1 1 calc R . . 
C33 C 0.2435(7) 0.9521(5) 0.5041(4) 0.026(2) Uani 1 1 d . . . 
H33 H 0.1928 0.9886 0.4962 0.031 Uiso 1 1 calc R . . 
C34 C 0.2185(6) 0.8862(5) 0.5237(4) 0.029(2) Uani 1 1 d . . . 
H34 H 0.1509 0.8769 0.5294 0.035 Uiso 1 1 calc R . . 
C35 C 0.2937(6) 0.8333(5) 0.5348(4) 0.022(2) Uani 1 1 d . . . 
H35 H 0.2764 0.7875 0.5474 0.027 Uiso 1 1 calc R . . 
C36 C 0.5233(6) 0.8902(4) 0.6967(4) 0.019(2) Uani 1 1 d . . . 
C37 C 0.6179(7) 0.9180(4) 0.6901(4) 0.024(2) Uani 1 1 d . . . 
H37 H 0.6781 0.8890 0.6971 0.029 Uiso 1 1 calc R . . 
C38 C 0.6220(7) 0.9883(5) 0.6734(4) 0.026(2) Uani 1 1 d . . . 
H38 H 0.6856 1.0075 0.6683 0.031 Uiso 1 1 calc R . . 
C39 C 0.5350(7) 1.0312(5) 0.6638(4) 0.025(2) Uani 1 1 d . . . 
H39 H 0.5398 1.0798 0.6538 0.030 Uiso 1 1 calc R . . 
C40 C 0.4418(7) 1.0033(5) 0.6689(4) 0.027(2) Uani 1 1 d . . . 
H40 H 0.3815 1.0322 0.6616 0.033 Uiso 1 1 calc R . . 
C41 C 0.4365(6) 0.9337(4) 0.6846(4) 0.023(2) Uani 1 1 d . . . 
H41 H 0.3716 0.9145 0.6873 0.028 Uiso 1 1 calc R . . 
C42 C 0.3976(6) 0.7881(4) 0.7453(4) 0.022(2) Uani 1 1 d . . . 
C43 C 0.3952(7) 0.8101(4) 0.8128(4) 0.028(2) Uani 1 1 d . . . 
H43 H 0.4556 0.8305 0.8439 0.033 Uiso 1 1 calc R . . 
C44 C 0.3043(7) 0.8021(4) 0.8341(5) 0.031(2) Uani 1 1 d . . . 
H44 H 0.3027 0.8159 0.8802 0.037 Uiso 1 1 calc R . . 
C45 C 0.2160(7) 0.7739(4) 0.7880(5) 0.030(2) Uani 1 1 d . . . 
H45 H 0.1533 0.7697 0.8022 0.036 Uiso 1 1 calc R . . 
C46 C 0.2180(6) 0.7519(4) 0.7217(4) 0.022(2) Uani 1 1 d . . . 
H46 H 0.1567 0.7328 0.6906 0.027 Uiso 1 1 calc R . . 
C47 C 0.3083(6) 0.7575(4) 0.7001(4) 0.020(2) Uani 1 1 d . . . 
H47 H 0.3101 0.7409 0.6550 0.024 Uiso 1 1 calc R . . 
B2 B 0.8362(8) 0.5682(5) 0.4986(5) 0.026(3) Uani 1 1 d . . . 
H2B H 0.8574 0.5720 0.4474 0.031 Uiso 1 1 calc R . . 
B3 B 0.9262(8) 0.5367(5) 0.5769(5) 0.029(3) Uani 1 1 d . . . 
H3B H 1.0072 0.5200 0.5772 0.034 Uiso 1 1 calc R . . 
B4 B 0.8999(9) 0.5786(6) 0.6496(6) 0.035(3) Uani 1 1 d . . . 
H4B H 0.9636 0.5897 0.6986 0.041 Uiso 1 1 calc R . . 
B5 B 0.7954(7) 0.6385(6) 0.6170(5) 0.028(3) Uani 1 1 d . . . 
H5B H 0.7903 0.6898 0.6439 0.033 Uiso 1 1 calc R . . 
B6 B 0.7564(7) 0.6306(5) 0.5241(5) 0.023(2) Uani 1 1 d . . . 
H6B H 0.7252 0.6769 0.4896 0.028 Uiso 1 1 calc R . . 
B8 B 0.7093(8) 0.5450(5) 0.5021(6) 0.028(3) Uani 1 1 d . . . 
H8B H 0.6461 0.5324 0.4532 0.034 Uiso 1 1 calc R . . 
B9 B 0.6832(8) 0.5890(5) 0.5747(5) 0.025(3) Uani 1 1 d . . . 
B10 B 0.7723(8) 0.5569(6) 0.6538(5) 0.030(3) Uani 1 1 d . . . 
H10B H 0.7507 0.5534 0.7049 0.036 Uiso 1 1 calc R . . 
B11 B 0.8538(9) 0.4932(6) 0.6268(6) 0.040(3) Uani 1 1 d . . . 
H11B H 0.8862 0.4462 0.6597 0.047 Uiso 1 1 calc R . . 
B12 B 0.7209(9) 0.4990(5) 0.5822(6) 0.034(3) Uani 1 1 d . . . 
H12B H 0.6652 0.4559 0.5861 0.040 Uiso 1 1 calc R . . 
B14 B 0.0865(8) 0.2290(6) 0.2234(6) 0.031(3) Uani 1 1 d . . . 
B13 B 0.6086(9) 0.8112(7) 0.0062(6) 0.038(3) Uani 1 1 d . . . 
B2' B 0.3581(9) 0.4705(6) 0.7050(6) 0.035(3) Uani 1 1 d . . . 
H2'B H 0.3096 0.4421 0.6576 0.042 Uiso 1 1 calc R . . 
B3' B 0.3516(8) 0.4493(6) 0.7914(5) 0.031(3) Uani 1 1 d . . . 
H3'B H 0.2985 0.4065 0.8003 0.037 Uiso 1 1 calc R . . 
B4' B 0.4757(8) 0.4647(5) 0.8513(5) 0.025(2) Uani 1 1 d . . . 
H4'B H 0.5062 0.4323 0.9000 0.030 Uiso 1 1 calc R . . 
B5' B 0.5580(8) 0.4956(6) 0.8010(6) 0.033(3) Uani 1 1 d . . . 
H5'B H 0.6435 0.4829 0.8170 0.039 Uiso 1 1 calc R . . 
B6' B 0.4884(9) 0.4991(5) 0.7114(6) 0.034(3) Uani 1 1 d . . . 
H6'B H 0.5276 0.4890 0.6686 0.041 Uiso 1 1 calc R . . 
B8' B 0.3853(8) 0.5617(6) 0.7025(5) 0.031(3) Uani 1 1 d . . . 
H8'B H 0.3545 0.5936 0.6535 0.037 Uiso 1 1 calc R . . 
B9' B 0.5084(8) 0.5768(5) 0.7621(5) 0.025(3) Uani 1 1 d . . . 
B10' B 0.5034(8) 0.5566(5) 0.8488(5) 0.024(2) Uani 1 1 d . . . 
H10' H 0.5518 0.5856 0.8958 0.029 Uiso 1 1 calc R . . 
B11' B 0.3732(8) 0.5258(5) 0.8427(5) 0.026(3) Uani 1 1 d . . . 
H11' H 0.3339 0.5341 0.8858 0.031 Uiso 1 1 calc R . . 
B12' B 0.3941(8) 0.5966(6) 0.7882(5) 0.028(3) Uani 1 1 d . . . 
H12' H 0.3687 0.6517 0.7955 0.034 Uiso 1 1 calc R . . 
  
loop_ 
 _atom_site_aniso_label 
 _atom_site_aniso_U_11 
 _atom_site_aniso_U_22 
 _atom_site_aniso_U_33 
 _atom_site_aniso_U_23 
 _atom_site_aniso_U_13 
 _atom_site_aniso_U_12 
Pt1 0.0198(2) 0.0215(2) 0.0199(2) -0.00032(18) 0.00397(14) -0.00066(19) 
S1 0.0280(13) 0.0226(13) 0.0247(13) -0.0020(10) 0.0088(10) -0.0009(10) 
S2 0.0223(12) 0.0225(13) 0.0234(12) 0.0011(10) 0.0037(10) -0.0011(10) 
P1 0.0207(12) 0.0261(14) 0.0165(12) 0.0013(10) 0.0014(9) 0.0003(10) 
P2 0.0210(12) 0.0225(14) 0.0176(12) -0.0041(10) 0.0021(9) -0.0004(10) 
F1 0.038(3) 0.035(3) 0.055(4) 0.012(3) 0.010(3) 0.010(3) 
F2 0.063(3) 0.062(3) 0.050(3) 0.018(2) 0.012(2) 0.011(2) 
F3 0.063(3) 0.062(3) 0.050(3) 0.018(2) 0.012(2) 0.011(2) 
F4 0.063(3) 0.062(3) 0.050(3) 0.018(2) 0.012(2) 0.011(2) 
F5 0.051(4) 0.064(4) 0.044(4) 0.018(3) -0.007(3) 0.005(3) 
F6 0.039(4) 0.141(7) 0.080(5) -0.066(5) 0.024(3) -0.027(4) 
F7 0.041(3) 0.044(3) 0.023(3) -0.001(2) 0.003(2) -0.018(3) 
F8 0.052(4) 0.044(4) 0.049(4) 0.004(3) -0.003(3) -0.019(3) 
F2A 0.063(3) 0.062(3) 0.050(3) 0.018(2) 0.012(2) 0.011(2) 
F3A 0.063(3) 0.062(3) 0.050(3) 0.018(2) 0.012(2) 0.011(2) 
F4A 0.063(3) 0.062(3) 0.050(3) 0.018(2) 0.012(2) 0.011(2) 
C1 0.027(5) 0.030(6) 0.018(5) -0.008(4) 0.008(4) -0.009(4) 
C7 0.033(6) 0.018(5) 0.040(6) -0.002(4) 0.014(5) -0.002(4) 
C1' 0.035(6) 0.021(5) 0.045(6) 0.002(4) 0.022(5) 0.000(4) 
C7' 0.022(5) 0.030(6) 0.023(5) 0.006(4) 0.004(4) 0.002(4) 
C20 0.025(5) 0.026(5) 0.019(5) 0.003(4) 0.008(4) 0.003(4) 
C21 0.028(5) 0.032(6) 0.023(5) -0.003(4) 0.004(4) 0.004(5) 
C22 0.039(5) 0.018(5) 0.021(5) -0.002(4) -0.001(4) -0.003(5) 
C23 0.029(5) 0.021(5) 0.027(5) 0.000(4) 0.005(4) -0.004(4) 
C24 0.026(5) 0.018(5) 0.008(4) 0.004(3) 0.004(4) 0.005(4) 
C25 0.036(6) 0.020(5) 0.022(5) 0.006(4) 0.010(5) 0.004(4) 
C26 0.022(5) 0.025(6) 0.030(6) 0.001(4) 0.001(4) -0.002(4) 
C27 0.040(6) 0.023(6) 0.037(6) 0.002(4) 0.015(5) -0.002(5) 
C28 0.047(7) 0.030(6) 0.018(5) 0.000(4) 0.014(5) 0.003(5) 
C29 0.036(6) 0.021(5) 0.019(5) 0.002(4) 0.001(4) 0.009(4) 
C30 0.021(5) 0.025(6) 0.014(5) -0.003(4) 0.001(4) -0.003(4) 
C31 0.027(5) 0.027(6) 0.021(5) -0.008(4) 0.007(4) 0.000(4) 
C32 0.036(6) 0.020(6) 0.031(6) 0.003(4) 0.004(5) -0.005(5) 
C33 0.028(6) 0.030(6) 0.016(5) 0.004(4) -0.003(4) 0.009(5) 
C34 0.014(5) 0.043(7) 0.028(6) 0.000(5) 0.002(4) 0.001(5) 
C35 0.025(5) 0.025(6) 0.015(5) 0.002(4) 0.001(4) -0.008(4) 
C36 0.030(5) 0.019(5) 0.009(5) -0.009(4) 0.010(4) -0.001(4) 
C37 0.033(6) 0.014(5) 0.021(5) 0.000(4) -0.001(4) 0.002(4) 
C38 0.025(5) 0.031(6) 0.022(5) 0.004(4) 0.006(4) -0.001(5) 
C39 0.032(6) 0.021(5) 0.015(5) 0.001(4) -0.005(4) 0.006(5) 
C40 0.025(6) 0.028(6) 0.029(6) 0.004(4) 0.006(4) 0.005(5) 
C41 0.021(5) 0.024(6) 0.026(5) -0.010(4) 0.007(4) 0.001(4) 
C42 0.026(5) 0.020(5) 0.019(5) -0.003(4) 0.003(4) 0.003(4) 
C43 0.026(5) 0.032(6) 0.019(5) 0.000(4) -0.003(4) 0.003(4) 
C44 0.038(6) 0.034(6) 0.019(5) 0.005(4) 0.005(5) 0.022(5) 
C45 0.032(6) 0.024(6) 0.039(6) 0.017(5) 0.018(5) 0.009(5) 
C46 0.014(5) 0.028(5) 0.022(5) 0.007(4) -0.001(4) -0.004(4) 
C47 0.028(5) 0.009(5) 0.021(5) 0.004(4) 0.004(4) -0.005(4) 
B2 0.031(6) 0.018(6) 0.024(6) 0.005(5) 0.001(5) -0.005(5) 
B3 0.025(6) 0.029(7) 0.028(7) 0.003(5) 0.000(5) 0.003(5) 
B4 0.038(7) 0.040(8) 0.025(7) 0.001(5) 0.007(5) 0.012(6) 
B5 0.027(6) 0.025(6) 0.027(6) 0.009(5) 0.001(5) 0.000(5) 
B6 0.025(6) 0.016(6) 0.024(6) 0.006(5) -0.001(5) 0.002(5) 
B8 0.032(7) 0.023(7) 0.032(7) -0.005(5) 0.013(5) 0.003(5) 
B9 0.034(6) 0.027(7) 0.021(6) 0.006(5) 0.019(5) -0.010(5) 
B10 0.044(7) 0.031(7) 0.019(6) 0.000(5) 0.014(5) 0.023(6) 
B11 0.044(8) 0.039(8) 0.036(7) 0.016(6) 0.011(6) 0.010(6) 
B12 0.046(7) 0.015(6) 0.047(8) 0.007(5) 0.026(6) 0.001(5) 
B14 0.023(6) 0.039(8) 0.034(7) -0.001(6) 0.009(6) -0.003(6) 
B13 0.042(8) 0.054(9) 0.025(7) -0.007(6) 0.017(6) -0.002(6) 
B2' 0.045(7) 0.035(7) 0.026(7) 0.002(5) 0.012(6) -0.013(6) 
B3' 0.037(7) 0.033(7) 0.019(6) -0.002(5) 0.001(5) -0.002(6) 
B4' 0.030(6) 0.032(6) 0.014(6) 0.006(5) 0.006(5) 0.011(5) 
B5' 0.025(6) 0.030(7) 0.045(7) 0.004(5) 0.011(5) 0.003(5) 
B6' 0.040(7) 0.024(7) 0.040(7) -0.015(5) 0.015(6) -0.005(6) 
B8' 0.024(6) 0.049(8) 0.015(6) 0.006(5) -0.004(5) -0.006(6) 
B9' 0.028(6) 0.029(7) 0.021(6) 0.006(5) 0.013(5) 0.002(5) 
B10' 0.026(6) 0.014(6) 0.029(6) 0.003(5) 0.003(5) -0.005(5) 
B11' 0.034(6) 0.027(6) 0.017(6) 0.000(5) 0.006(5) -0.006(5) 
B12' 0.034(7) 0.025(7) 0.026(6) 0.006(5) 0.011(5) -0.004(5) 
  
_geom_special_details 
; 
 All esds (except the esd in the dihedral angle between two l.s. planes) 
 are estimated using the full covariance matrix.  The cell esds are taken 
 into account individually in the estimation of esds in distances, angles 
 and torsion angles; correlations between esds in cell parameters are only 
 used when they are defined by crystal symmetry.  An approximate (isotropic) 
 treatment of cell esds is used for estimating esds involving l.s. planes. 
; 
  
loop_ 
 _geom_bond_atom_site_label_1 
 _geom_bond_atom_site_label_2 
 _geom_bond_distance 
 _geom_bond_site_symmetry_2 
 _geom_bond_publ_flag 
Pt1 P2 2.254(2) . ? 
Pt1 P1 2.266(2) . ? 
Pt1 S2 2.377(2) . ? 
Pt1 S1 2.379(2) . ? 
S1 C20 1.859(8) . ? 
S1 B9 1.885(10) . ? 
S2 C22 1.844(8) . ? 
S2 B9' 1.907(10) . ? 
P1 C30 1.796(8) . ? 
P1 C24 1.810(8) . ? 
P1 C21 1.825(8) . ? 
P2 C42 1.805(8) . ? 
P2 C36 1.812(8) . ? 
P2 C23 1.841(8) . ? 
F1 B13 1.381(13) . ? 
F2 B13 1.395(13) . ? 
F3 B13 1.431(14) . ? 
F4 B13 1.337(13) . ? 
F5 B14 1.381(12) . ? 
F6 B14 1.354(12) . ? 
F7 B14 1.389(12) . ? 
F8 B14 1.375(12) . ? 
F2A B13 1.40(4) . ? 
F3A B13 1.38(4) . ? 
F4A B13 1.41(4) . ? 
C1 B3 1.685(13) . ? 
C1 B5 1.704(13) . ? 
C1 B6 1.708(12) . ? 
C1 B4 1.709(13) . ? 
C1 B2 1.712(12) . ? 
C1 H1B 1.1200 . ? 
C7 B11 1.684(14) . ? 
C7 B2 1.690(13) . ? 
C7 B3 1.695(13) . ? 
C7 B12 1.698(13) . ? 
C7 B8 1.701(13) . ? 
C7 H7B 1.1200 . ? 
C1' B3' 1.684(13) . ? 
C1' B5' 1.691(14) . ? 
C1' B2' 1.704(14) . ? 
C1' B6' 1.709(14) . ? 
C1' B4' 1.712(13) . ? 
C1' H1'B 1.1200 . ? 
C7' B3' 1.689(13) . ? 
C7' B11' 1.696(12) . ? 
C7' B12' 1.697(13) . ? 
C7' B2' 1.698(14) . ? 
C7' B8' 1.715(13) . ? 
C7' H7'B 1.1200 . ? 
C20 C21 1.532(11) . ? 
C20 H20A 0.9900 . ? 
C20 H20B 0.9900 . ? 
C21 H21A 0.9900 . ? 
C21 H21B 0.9900 . ? 
C22 C23 1.517(11) . ? 
C22 H22A 0.9900 . ? 
C22 H22B 0.9900 . ? 
C23 H23A 0.9900 . ? 
C23 H23B 0.9900 . ? 
C24 C25 1.384(11) . ? 
C24 C29 1.399(10) . ? 
C25 C26 1.391(11) . ? 
C25 H25 0.9500 . ? 
C26 C27 1.358(11) . ? 
C26 H26 0.9500 . ? 
C27 C28 1.383(12) . ? 
C27 H27 0.9500 . ? 
C28 C29 1.382(12) . ? 
C28 H28 0.9500 . ? 
C29 H29 0.9500 . ? 
C30 C35 1.376(11) . ? 
C30 C31 1.409(11) . ? 
C31 C32 1.378(11) . ? 
C31 H31 0.9500 . ? 
C32 C33 1.379(12) . ? 
C32 H32 0.9500 . ? 
C33 C34 1.378(12) . ? 
C33 H33 0.9500 . ? 
C34 C35 1.392(11) . ? 
C34 H34 0.9500 . ? 
C35 H35 0.9500 . ? 
C36 C41 1.385(11) . ? 
C36 C37 1.399(11) . ? 
C37 C38 1.380(11) . ? 
C37 H37 0.9500 . ? 
C38 C39 1.384(11) . ? 
C38 H38 0.9500 . ? 
C39 C40 1.374(11) . ? 
C39 H39 0.9500 . ? 
C40 C41 1.364(11) . ? 
C40 H40 0.9500 . ? 
C41 H41 0.9500 . ? 
C42 C47 1.402(11) . ? 
C42 C43 1.402(11) . ? 
C43 C44 1.389(12) . ? 
C43 H43 0.9500 . ? 
C44 C45 1.383(12) . ? 
C44 H44 0.9500 . ? 
C45 C46 1.378(11) . ? 
C45 H45 0.9500 . ? 
C46 C47 1.379(11) . ? 
C46 H46 0.9500 . ? 
C47 H47 0.9500 . ? 
B2 B6 1.750(14) . ? 
B2 B8 1.760(14) . ? 
B2 B3 1.782(14) . ? 
B2 H2B 1.1200 . ? 
B3 B4 1.753(14) . ? 
B3 B11 1.754(15) . ? 
B3 H3B 1.1200 . ? 
B4 B11 1.748(16) . ? 
B4 B10 1.766(15) . ? 
B4 B5 1.776(14) . ? 
B4 H4B 1.1200 . ? 
B5 B6 1.769(14) . ? 
B5 B9 1.770(14) . ? 
B5 B10 1.774(15) . ? 
B5 H5B 1.1200 . ? 
B6 B8 1.755(14) . ? 
B6 B9 1.757(13) . ? 
B6 H6B 1.1200 . ? 
B8 B9 1.769(14) . ? 
B8 B12 1.773(14) . ? 
B8 H8B 1.1200 . ? 
B9 B12 1.776(14) . ? 
B9 B10 1.790(14) . ? 
B10 B12 1.774(15) . ? 
B10 B11 1.796(15) . ? 
B10 H10B 1.1200 . ? 
B11 B12 1.751(16) . ? 
B11 H11B 1.1200 . ? 
B12 H12B 1.1200 . ? 
B2' B3' 1.772(14) . ? 
B2' B8' 1.773(15) . ? 
B2' B6' 1.785(15) . ? 
B2' H2'B 1.1200 . ? 
B3' B11' 1.750(14) . ? 
B3' B4' 1.775(14) . ? 
B3' H3'B 1.1200 . ? 
B4' B5' 1.760(14) . ? 
B4' B11' 1.761(14) . ? 
B4' B10' 1.787(14) . ? 
B4' H4'B 1.1200 . ? 
B5' B6' 1.761(16) . ? 
B5' B10' 1.766(15) . ? 
B5' B9' 1.768(14) . ? 
B5' H5'B 1.1200 . ? 
B6' B9' 1.762(14) . ? 
B6' B8' 1.785(15) . ? 
B6' H6'B 1.1200 . ? 
B8' B9' 1.761(14) . ? 
B8' B12' 1.788(14) . ? 
B8' H8'B 1.1200 . ? 
B9' B10' 1.769(13) . ? 
B9' B12' 1.769(14) . ? 
B10' B12' 1.782(14) . ? 
B10' B11' 1.797(14) . ? 
B10' H10' 1.1200 . ? 
B11' B12' 1.789(14) . ? 
B11' H11' 1.1200 . ? 
B12' H12' 1.1200 . ? 
  
loop_ 
 _geom_angle_atom_site_label_1 
 _geom_angle_atom_site_label_2 
 _geom_angle_atom_site_label_3 
 _geom_angle 
 _geom_angle_site_symmetry_1 
 _geom_angle_site_symmetry_3 
 _geom_angle_publ_flag 
P2 Pt1 P1 98.88(8) . . ? 
P2 Pt1 S2 84.77(8) . . ? 
P1 Pt1 S2 172.90(7) . . ? 
P2 Pt1 S1 174.64(8) . . ? 
P1 Pt1 S1 85.16(8) . . ? 
S2 Pt1 S1 91.60(7) . . ? 
C20 S1 B9 101.5(4) . . ? 
C20 S1 Pt1 105.4(3) . . ? 
B9 S1 Pt1 112.9(3) . . ? 
C22 S2 B9' 103.5(4) . . ? 
C22 S2 Pt1 105.5(3) . . ? 
B9' S2 Pt1 112.0(3) . . ? 
C30 P1 C24 108.3(4) . . ? 
C30 P1 C21 104.4(4) . . ? 
C24 P1 C21 106.4(4) . . ? 
C30 P1 Pt1 122.7(3) . . ? 
C24 P1 Pt1 109.6(3) . . ? 
C21 P1 Pt1 104.1(3) . . ? 
C42 P2 C36 105.9(4) . . ? 
C42 P2 C23 106.9(4) . . ? 
C36 P2 C23 105.9(4) . . ? 
C42 P2 Pt1 111.7(3) . . ? 
C36 P2 Pt1 121.4(3) . . ? 
C23 P2 Pt1 104.1(3) . . ? 
B3 C1 B5 114.4(7) . . ? 
B3 C1 B6 113.9(7) . . ? 
B5 C1 B6 62.5(5) . . ? 
B3 C1 B4 62.2(6) . . ? 
B5 C1 B4 62.7(5) . . ? 
B6 C1 B4 113.7(7) . . ? 
B3 C1 B2 63.3(6) . . ? 
B5 C1 B2 113.8(7) . . ? 
B6 C1 B2 61.6(5) . . ? 
B4 C1 B2 114.1(7) . . ? 
B3 C1 H1B 117.7 . . ? 
B5 C1 H1B 117.9 . . ? 
B6 C1 H1B 118.6 . . ? 
B4 C1 H1B 118.2 . . ? 
B2 C1 H1B 118.2 . . ? 
B11 C7 B2 115.5(7) . . ? 
B11 C7 B3 62.6(6) . . ? 
B2 C7 B3 63.5(6) . . ? 
B11 C7 B12 62.4(6) . . ? 
B2 C7 B12 114.6(7) . . ? 
B3 C7 B12 114.1(7) . . ? 
B11 C7 B8 115.0(7) . . ? 
B2 C7 B8 62.5(6) . . ? 
B3 C7 B8 115.0(7) . . ? 
B12 C7 B8 62.9(6) . . ? 
B11 C7 H7B 117.5 . . ? 
B2 C7 H7B 117.2 . . ? 
B3 C7 H7B 117.6 . . ? 
B12 C7 H7B 118.2 . . ? 
B8 C7 H7B 117.5 . . ? 
B3' C1' B5' 114.2(7) . . ? 
B3' C1' B2' 63.0(6) . . ? 
B5' C1' B2' 114.4(7) . . ? 
B3' C1' B6' 115.2(7) . . ? 
B5' C1' B6' 62.4(6) . . ? 
B2' C1' B6' 63.1(6) . . ? 
B3' C1' B4' 63.0(6) . . ? 
B5' C1' B4' 62.3(6) . . ? 
B2' C1' B4' 115.4(7) . . ? 
B6' C1' B4' 114.8(7) . . ? 
B3' C1' H1'B 117.5 . . ? 
B5' C1' H1'B 118.4 . . ? 
B2' C1' H1'B 117.3 . . ? 
B6' C1' H1'B 117.5 . . ? 
B4' C1' H1'B 117.5 . . ? 
B3' C7' B11' 62.2(5) . . ? 
B3' C7' B12' 115.2(7) . . ? 
B11' C7' B12' 63.6(5) . . ? 
B3' C7' B2' 63.1(6) . . ? 
B11' C7' B2' 115.1(7) . . ? 
B12' C7' B2' 115.4(7) . . ? 
B3' C7' B8' 115.0(7) . . ? 
B11' C7' B8' 115.9(7) . . ? 
B12' C7' B8' 63.2(6) . . ? 
B2' C7' B8' 62.6(6) . . ? 
B3' C7' H7'B 117.8 . . ? 
B11' C7' H7'B 117.2 . . ? 
B12' C7' H7'B 116.9 . . ? 
B2' C7' H7'B 117.5 . . ? 
B8' C7' H7'B 117.2 . . ? 
C21 C20 S1 109.3(5) . . ? 
C21 C20 H20A 109.8 . . ? 
S1 C20 H20A 109.8 . . ? 
C21 C20 H20B 109.8 . . ? 
S1 C20 H20B 109.8 . . ? 
H20A C20 H20B 108.3 . . ? 
C20 C21 P1 108.2(5) . . ? 
C20 C21 H21A 110.1 . . ? 
P1 C21 H21A 110.1 . . ? 
C20 C21 H21B 110.1 . . ? 
P1 C21 H21B 110.1 . . ? 
H21A C21 H21B 108.4 . . ? 
C23 C22 S2 111.1(6) . . ? 
C23 C22 H22A 109.4 . . ? 
S2 C22 H22A 109.4 . . ? 
C23 C22 H22B 109.4 . . ? 
S2 C22 H22B 109.4 . . ? 
H22A C22 H22B 108.0 . . ? 
C22 C23 P2 107.8(6) . . ? 
C22 C23 H23A 110.2 . . ? 
P2 C23 H23A 110.2 . . ? 
C22 C23 H23B 110.2 . . ? 
P2 C23 H23B 110.2 . . ? 
H23A C23 H23B 108.5 . . ? 
C25 C24 C29 118.8(8) . . ? 
C25 C24 P1 119.6(6) . . ? 
C29 C24 P1 121.5(6) . . ? 
C24 C25 C26 120.3(8) . . ? 
C24 C25 H25 119.8 . . ? 
C26 C25 H25 119.8 . . ? 
C27 C26 C25 119.7(8) . . ? 
C27 C26 H26 120.1 . . ? 
C25 C26 H26 120.1 . . ? 
C26 C27 C28 121.6(9) . . ? 
C26 C27 H27 119.2 . . ? 
C28 C27 H27 119.2 . . ? 
C29 C28 C27 118.8(8) . . ? 
C29 C28 H28 120.6 . . ? 
C27 C28 H28 120.6 . . ? 
C28 C29 C24 120.7(8) . . ? 
C28 C29 H29 119.6 . . ? 
C24 C29 H29 119.6 . . ? 
C35 C30 C31 118.7(8) . . ? 
C35 C30 P1 119.0(7) . . ? 
C31 C30 P1 122.2(6) . . ? 
C32 C31 C30 119.5(8) . . ? 
C32 C31 H31 120.2 . . ? 
C30 C31 H31 120.2 . . ? 
C31 C32 C33 120.8(8) . . ? 
C31 C32 H32 119.6 . . ? 
C33 C32 H32 119.6 . . ? 
C34 C33 C32 120.5(8) . . ? 
C34 C33 H33 119.8 . . ? 
C32 C33 H33 119.8 . . ? 
C33 C34 C35 118.9(8) . . ? 
C33 C34 H34 120.5 . . ? 
C35 C34 H34 120.5 . . ? 
C30 C35 C34 121.6(8) . . ? 
C30 C35 H35 119.2 . . ? 
C34 C35 H35 119.2 . . ? 
C41 C36 C37 119.0(8) . . ? 
C41 C36 P2 121.7(6) . . ? 
C37 C36 P2 119.3(6) . . ? 
C38 C37 C36 118.7(8) . . ? 
C38 C37 H37 120.6 . . ? 
C36 C37 H37 120.6 . . ? 
C37 C38 C39 121.2(8) . . ? 
C37 C38 H38 119.4 . . ? 
C39 C38 H38 119.4 . . ? 
C40 C39 C38 119.7(8) . . ? 
C40 C39 H39 120.1 . . ? 
C38 C39 H39 120.1 . . ? 
C41 C40 C39 119.6(8) . . ? 
C41 C40 H40 120.2 . . ? 
C39 C40 H40 120.2 . . ? 
C40 C41 C36 121.7(8) . . ? 
C40 C41 H41 119.2 . . ? 
C36 C41 H41 119.2 . . ? 
C47 C42 C43 119.7(8) . . ? 
C47 C42 P2 120.9(6) . . ? 
C43 C42 P2 119.4(6) . . ? 
C44 C43 C42 119.7(8) . . ? 
C44 C43 H43 120.2 . . ? 
C42 C43 H43 120.2 . . ? 
C45 C44 C43 119.7(8) . . ? 
C45 C44 H44 120.1 . . ? 
C43 C44 H44 120.1 . . ? 
C46 C45 C44 120.8(8) . . ? 
C46 C45 H45 119.6 . . ? 
C44 C45 H45 119.6 . . ? 
C45 C46 C47 120.5(8) . . ? 
C45 C46 H46 119.7 . . ? 
C47 C46 H46 119.7 . . ? 
C46 C47 C42 119.5(8) . . ? 
C46 C47 H47 120.3 . . ? 
C42 C47 H47 120.3 . . ? 
C7 B2 C1 100.5(7) . . ? 
C7 B2 B6 104.5(7) . . ? 
C1 B2 B6 59.1(5) . . ? 
C7 B2 B8 59.0(5) . . ? 
C1 B2 B8 105.0(7) . . ? 
B6 B2 B8 60.0(6) . . ? 
C7 B2 B3 58.4(5) . . ? 
C1 B2 B3 57.6(5) . . ? 
B6 B2 B3 107.2(7) . . ? 
B8 B2 B3 107.9(7) . . ? 
C7 B2 H2B 125.7 . . ? 
C1 B2 H2B 125.7 . . ? 
B6 B2 H2B 122.2 . . ? 
B8 B2 H2B 121.7 . . ? 
B3 B2 H2B 121.9 . . ? 
C1 B3 C7 101.5(7) . . ? 
C1 B3 B4 59.6(6) . . ? 
C7 B3 B4 104.4(7) . . ? 
C1 B3 B11 105.4(7) . . ? 
C7 B3 B11 58.4(6) . . ? 
B4 B3 B11 59.8(6) . . ? 
C1 B3 B2 59.1(5) . . ? 
C7 B3 B2 58.1(5) . . ? 
B4 B3 B2 108.7(8) . . ? 
B11 B3 B2 107.6(7) . . ? 
C1 B3 H3B 124.7 . . ? 
C7 B3 H3B 125.9 . . ? 
B4 B3 H3B 121.8 . . ? 
B11 B3 H3B 122.2 . . ? 
B2 B3 H3B 121.3 . . ? 
C1 B4 B11 104.6(7) . . ? 
C1 B4 B3 58.2(5) . . ? 
B11 B4 B3 60.1(6) . . ? 
C1 B4 B10 105.5(7) . . ? 
B11 B4 B10 61.5(6) . . ? 
B3 B4 B10 109.7(8) . . ? 
C1 B4 B5 58.5(5) . . ? 
B11 B4 B5 108.5(8) . . ? 
B3 B4 B5 107.6(7) . . ? 
B10 B4 B5 60.1(6) . . ? 
C1 B4 H4B 125.1 . . ? 
B11 B4 H4B 121.9 . . ? 
B3 B4 H4B 121.3 . . ? 
B10 B4 H4B 121.0 . . ? 
B5 B4 H4B 121.7 . . ? 
C1 B5 B6 58.9(5) . . ? 
C1 B5 B9 105.0(7) . . ? 
B6 B5 B9 59.5(5) . . ? 
C1 B5 B10 105.4(7) . . ? 
B6 B5 B10 108.3(7) . . ? 
B9 B5 B10 60.7(6) . . ? 
C1 B5 B4 58.8(5) . . ? 
B6 B5 B4 107.6(7) . . ? 
B9 B5 B4 107.8(8) . . ? 
B10 B5 B4 59.7(6) . . ? 
C1 B5 H5B 124.4 . . ? 
B6 B5 H5B 121.7 . . ? 
B9 B5 H5B 122.3 . . ? 
B10 B5 H5B 121.9 . . ? 
B4 B5 H5B 121.9 . . ? 
C1 B6 B2 59.4(5) . . ? 
C1 B6 B8 105.5(7) . . ? 
B2 B6 B8 60.3(6) . . ? 
C1 B6 B9 105.3(7) . . ? 
B2 B6 B9 109.1(7) . . ? 
B8 B6 B9 60.5(6) . . ? 
C1 B6 B5 58.7(5) . . ? 
B2 B6 B5 108.8(7) . . ? 
B8 B6 B5 108.6(7) . . ? 
B9 B6 B5 60.2(6) . . ? 
C1 B6 H6B 124.4 . . ? 
B2 B6 H6B 120.8 . . ? 
B8 B6 H6B 121.9 . . ? 
B9 B6 H6B 121.8 . . ? 
B5 B6 H6B 121.2 . . ? 
C7 B8 B6 103.8(7) . . ? 
C7 B8 B2 58.5(5) . . ? 
B6 B8 B2 59.7(6) . . ? 
C7 B8 B9 104.7(7) . . ? 
B6 B8 B9 59.8(5) . . ? 
B2 B8 B9 108.1(7) . . ? 
C7 B8 B12 58.5(6) . . ? 
B6 B8 B12 107.3(7) . . ? 
B2 B8 B12 107.7(7) . . ? 
B9 B8 B12 60.2(6) . . ? 
C7 B8 H8B 125.1 . . ? 
B6 B8 H8B 123.0 . . ? 
B2 B8 H8B 121.6 . . ? 
B9 B8 H8B 122.1 . . ? 
B12 B8 H8B 121.7 . . ? 
B6 B9 B8 59.7(5) . . ? 
B6 B9 B5 60.2(5) . . ? 
B8 B9 B5 108.0(7) . . ? 
B6 B9 B12 107.1(7) . . ? 
B8 B9 B12 60.0(6) . . ? 
B5 B9 B12 106.9(7) . . ? 
B6 B9 B10 108.1(7) . . ? 
B8 B9 B10 108.4(7) . . ? 
B5 B9 B10 59.8(6) . . ? 
B12 B9 B10 59.7(6) . . ? 
B6 B9 S1 122.2(6) . . ? 
B8 B9 S1 118.7(7) . . ? 
B5 B9 S1 125.0(7) . . ? 
B12 B9 S1 120.4(6) . . ? 
B10 B9 S1 123.0(6) . . ? 
B4 B10 B5 60.2(6) . . ? 
B4 B10 B12 106.0(7) . . ? 
B5 B10 B12 106.8(7) . . ? 
B4 B10 B9 107.3(7) . . ? 
B5 B10 B9 59.5(5) . . ? 
B12 B10 B9 59.8(6) . . ? 
B4 B10 B11 58.8(6) . . ? 
B5 B10 B11 106.5(7) . . ? 
B12 B10 B11 58.7(6) . . ? 
B9 B10 B11 106.4(7) . . ? 
B4 B10 H10B 122.4 . . ? 
B5 B10 H10B 122.2 . . ? 
B12 B10 H10B 122.8 . . ? 
B9 B10 H10B 122.2 . . ? 
B11 B10 H10B 123.2 . . ? 
C7 B11 B4 105.1(7) . . ? 
C7 B11 B12 59.2(6) . . ? 
B4 B11 B12 107.8(8) . . ? 
C7 B11 B3 59.0(6) . . ? 
B4 B11 B3 60.1(6) . . ? 
B12 B11 B3 108.6(8) . . ? 
C7 B11 B10 105.4(7) . . ? 
B4 B11 B10 59.8(6) . . ? 
B12 B11 B10 60.0(6) . . ? 
B3 B11 B10 108.2(8) . . ? 
C7 B11 H11B 124.2 . . ? 
B4 B11 H11B 122.5 . . ? 
B12 B11 H11B 121.3 . . ? 
B3 B11 H11B 121.2 . . ? 
B10 B11 H11B 122.3 . . ? 
C7 B12 B11 58.4(6) . . ? 
C7 B12 B8 58.6(6) . . ? 
B11 B12 B8 108.2(8) . . ? 
C7 B12 B10 105.7(7) . . ? 
B11 B12 B10 61.2(6) . . ? 
B8 B12 B10 108.9(7) . . ? 
C7 B12 B9 104.6(7) . . ? 
B11 B12 B9 109.0(8) . . ? 
B8 B12 B9 59.8(6) . . ? 
B10 B12 B9 60.6(6) . . ? 
C7 B12 H12B 124.9 . . ? 
B11 B12 H12B 121.0 . . ? 
B8 B12 H12B 121.4 . . ? 
B10 B12 H12B 121.2 . . ? 
B9 B12 H12B 122.2 . . ? 
F6 B14 F8 111.8(9) . . ? 
F6 B14 F5 108.6(9) . . ? 
F8 B14 F5 108.5(8) . . ? 
F6 B14 F7 108.8(8) . . ? 
F8 B14 F7 109.9(8) . . ? 
F5 B14 F7 109.3(9) . . ? 
F4 B13 F3A 84.6(18) . . ? 
F4 B13 F1 114.6(9) . . ? 
F3A B13 F1 102.9(18) . . ? 
F4 B13 F2 111.3(10) . . ? 
F3A B13 F2 136(2) . . ? 
F1 B13 F2 106.6(9) . . ? 
F4 B13 F2A 142.8(18) . . ? 
F3A B13 F2A 91(2) . . ? 
F1 B13 F2A 102.4(16) . . ? 
F2 B13 F2A 50.9(17) . . ? 
F4 B13 F4A 72.3(17) . . ? 
F3A B13 F4A 146(2) . . ? 
F1 B13 F4A 109.3(16) . . ? 
F2 B13 F4A 42.6(16) . . ? 
F2A B13 F4A 93(2) . . ? 
F4 B13 F3 109.7(9) . . ? 
F3A B13 F3 34.7(16) . . ? 
F1 B13 F3 111.4(9) . . ? 
F2 B13 F3 102.5(9) . . ? 
F2A B13 F3 56.5(17) . . ? 
F4A B13 F3 133.0(18) . . ? 
C7' B2' C1' 100.2(7) . . ? 
C7' B2' B3' 58.2(6) . . ? 
C1' B2' B3' 57.9(6) . . ? 
C7' B2' B8' 59.2(6) . . ? 
C1' B2' B8' 104.8(7) . . ? 
B3' B2' B8' 108.2(8) . . ? 
C7' B2' B6' 104.5(7) . . ? 
C1' B2' B6' 58.6(6) . . ? 
B3' B2' B6' 107.3(8) . . ? 
B8' B2' B6' 60.2(6) . . ? 
C7' B2' H2'B 125.8 . . ? 
C1' B2' H2'B 126.0 . . ? 
B3' B2' H2'B 121.7 . . ? 
B8' B2' H2'B 121.5 . . ? 
B6' B2' H2'B 122.2 . . ? 
C1' B3' C7' 101.4(7) . . ? 
C1' B3' B11' 105.3(7) . . ? 
C7' B3' B11' 59.1(5) . . ? 
C1' B3' B2' 59.0(6) . . ? 
C7' B3' B2' 58.7(6) . . ? 
B11' B3' B2' 108.9(8) . . ? 
C1' B3' B4' 59.2(5) . . ? 
C7' B3' B4' 104.9(7) . . ? 
B11' B3' B4' 59.9(6) . . ? 
B2' B3' B4' 109.0(8) . . ? 
C1' B3' H3'B 125.1 . . ? 
C7' B3' H3'B 125.5 . . ? 
B11' B3' H3'B 121.7 . . ? 
B2' B3' H3'B 120.7 . . ? 
B4' B3' H3'B 121.7 . . ? 
C1' B4' B5' 58.3(5) . . ? 
C1' B4' B11' 103.6(7) . . ? 
B5' B4' B11' 107.8(7) . . ? 
C1' B4' B3' 57.7(5) . . ? 
B5' B4' B3' 106.6(7) . . ? 
B11' B4' B3' 59.3(6) . . ? 
C1' B4' B10' 104.2(7) . . ? 
B5' B4' B10' 59.7(6) . . ? 
B11' B4' B10' 60.8(5) . . ? 
B3' B4' B10' 107.6(7) . . ? 
C1' B4' H4'B 125.6 . . ? 
B5' B4' H4'B 122.0 . . ? 
B11' B4' H4'B 122.4 . . ? 
B3' B4' H4'B 122.4 . . ? 
B10' B4' H4'B 122.1 . . ? 
C1' B5' B4' 59.4(5) . . ? 
C1' B5' B6' 59.3(6) . . ? 
B4' B5' B6' 109.8(7) . . ? 
C1' B5' B10' 106.0(7) . . ? 
B4' B5' B10' 60.9(6) . . ? 
B6' B5' B10' 109.2(7) . . ? 
C1' B5' B9' 104.6(7) . . ? 
B4' B5' B9' 108.7(7) . . ? 
B6' B5' B9' 59.9(6) . . ? 
B10' B5' B9' 60.1(5) . . ? 
C1' B5' H5'B 124.4 . . ? 
B4' B5' H5'B 120.4 . . ? 
B6' B5' H5'B 120.6 . . ? 
B10' B5' H5'B 121.5 . . ? 
B9' B5' H5'B 122.7 . . ? 
C1' B6' B5' 58.3(6) . . ? 
C1' B6' B9' 104.2(7) . . ? 
B5' B6' B9' 60.2(6) . . ? 
C1' B6' B2' 58.3(6) . . ? 
B5' B6' B2' 107.2(8) . . ? 
B9' B6' B2' 106.9(7) . . ? 
C1' B6' B8' 104.1(7) . . ? 
B5' B6' B8' 107.8(7) . . ? 
B9' B6' B8' 59.5(6) . . ? 
B2' B6' B8' 59.5(6) . . ? 
C1' B6' H6'B 125.1 . . ? 
B5' B6' H6'B 121.6 . . ? 
B9' B6' H6'B 122.8 . . ? 
B2' B6' H6'B 122.2 . . ? 
B8' B6' H6'B 122.7 . . ? 
C7' B8' B9' 103.2(7) . . ? 
C7' B8' B2' 58.3(6) . . ? 
B9' B8' B2' 107.5(8) . . ? 
C7' B8' B6' 103.8(7) . . ? 
B9' B8' B6' 59.6(6) . . ? 
B2' B8' B6' 60.2(6) . . ? 
C7' B8' B12' 57.9(5) . . ? 
B9' B8' B12' 59.8(5) . . ? 
B2' B8' B12' 107.4(7) . . ? 
B6' B8' B12' 107.5(7) . . ? 
C7' B8' H8'B 125.8 . . ? 
B9' B8' H8'B 123.0 . . ? 
B2' B8' H8'B 121.6 . . ? 
B6' B8' H8'B 122.6 . . ? 
B12' B8' H8'B 121.9 . . ? 
B8' B9' B6' 60.9(6) . . ? 
B8' B9' B5' 108.5(7) . . ? 
B6' B9' B5' 59.9(6) . . ? 
B8' B9' B10' 109.8(7) . . ? 
B6' B9' B10' 109.1(7) . . ? 
B5' B9' B10' 59.9(6) . . ? 
B8' B9' B12' 60.9(6) . . ? 
B6' B9' B12' 109.4(7) . . ? 
B5' B9' B12' 108.0(7) . . ? 
B10' B9' B12' 60.5(5) . . ? 
B8' B9' S2 123.1(6) . . ? 
B6' B9' S2 119.0(6) . . ? 
B5' B9' S2 118.5(6) . . ? 
B10' B9' S2 120.3(6) . . ? 
B12' B9' S2 124.5(7) . . ? 
B5' B10' B9' 60.0(6) . . ? 
B5' B10' B12' 107.5(7) . . ? 
B9' B10' B12' 59.8(5) . . ? 
B5' B10' B4' 59.4(5) . . ? 
B9' B10' B4' 107.5(7) . . ? 
B12' B10' B4' 107.4(7) . . ? 
B5' B10' B11' 106.0(7) . . ? 
B9' B10' B11' 107.0(7) . . ? 
B12' B10' B11' 60.0(5) . . ? 
B4' B10' B11' 58.9(5) . . ? 
B5' B10' H10' 122.5 . . ? 
B9' B10' H10' 121.9 . . ? 
B12' B10' H10' 121.7 . . ? 
B4' B10' H10' 122.3 . . ? 
B11' B10' H10' 122.9 . . ? 
C7' B11' B3' 58.7(5) . . ? 
C7' B11' B4' 105.2(7) . . ? 
B3' B11' B4' 60.8(6) . . ? 
C7' B11' B12' 58.2(5) . . ? 
B3' B11' B12' 107.8(7) . . ? 
B4' B11' B12' 108.3(7) . . ? 
C7' B11' B10' 104.0(7) . . ? 
B3' B11' B10' 108.3(7) . . ? 
B4' B11' B10' 60.3(6) . . ? 
B12' B11' B10' 59.6(6) . . ? 
C7' B11' H11' 125.1 . . ? 
B3' B11' H11' 121.2 . . ? 
B4' B11' H11' 121.7 . . ? 
B12' B11' H11' 121.8 . . ? 
B10' B11' H11' 122.6 . . ? 
C7' B12' B9' 103.6(7) . . ? 
C7' B12' B10' 104.6(7) . . ? 
B9' B12' B10' 59.7(6) . . ? 
C7' B12' B8' 58.9(5) . . ? 
B9' B12' B8' 59.4(6) . . ? 
B10' B12' B8' 108.0(7) . . ? 
C7' B12' B11' 58.1(5) . . ? 
B9' B12' B11' 107.3(7) . . ? 
B10' B12' B11' 60.4(6) . . ? 
B8' B12' B11' 107.8(7) . . ? 
C7' B12' H12' 125.2 . . ? 
B9' B12' H12' 123.2 . . ? 
B10' B12' H12' 122.1 . . ? 
B8' B12' H12' 121.5 . . ? 
B11' B12' H12' 121.7 . . ? 
  
loop_ 
 _geom_torsion_atom_site_label_1 
 _geom_torsion_atom_site_label_2 
 _geom_torsion_atom_site_label_3 
 _geom_torsion_atom_site_label_4 
 _geom_torsion 
 _geom_torsion_site_symmetry_1 
 _geom_torsion_site_symmetry_2 
 _geom_torsion_site_symmetry_3 
 _geom_torsion_site_symmetry_4 
 _geom_torsion_publ_flag 
P2 Pt1 S1 C20 135.6(8) . . . . ? 
P1 Pt1 S1 C20 -3.4(3) . . . . ? 
S2 Pt1 S1 C20 -177.1(3) . . . . ? 
P2 Pt1 S1 B9 -114.5(8) . . . . ? 
P1 Pt1 S1 B9 106.5(3) . . . . ? 
S2 Pt1 S1 B9 -67.2(3) . . . . ? 
P2 Pt1 S2 C22 -7.6(3) . . . . ? 
P1 Pt1 S2 C22 113.7(7) . . . . ? 
S1 Pt1 S2 C22 176.3(3) . . . . ? 
P2 Pt1 S2 B9' 104.3(3) . . . . ? 
P1 Pt1 S2 B9' -134.4(7) . . . . ? 
S1 Pt1 S2 B9' -71.7(3) . . . . ? 
P2 Pt1 P1 C30 -30.2(3) . . . . ? 
S2 Pt1 P1 C30 -150.7(6) . . . . ? 
S1 Pt1 P1 C30 146.2(3) . . . . ? 
P2 Pt1 P1 C24 98.5(3) . . . . ? 
S2 Pt1 P1 C24 -22.1(7) . . . . ? 
S1 Pt1 P1 C24 -85.1(3) . . . . ? 
P2 Pt1 P1 C21 -148.0(3) . . . . ? 
S2 Pt1 P1 C21 91.5(7) . . . . ? 
S1 Pt1 P1 C21 28.4(3) . . . . ? 
P1 Pt1 P2 C42 102.1(3) . . . . ? 
S2 Pt1 P2 C42 -84.1(3) . . . . ? 
S1 Pt1 P2 C42 -36.5(9) . . . . ? 
P1 Pt1 P2 C36 -23.9(3) . . . . ? 
S2 Pt1 P2 C36 150.0(3) . . . . ? 
S1 Pt1 P2 C36 -162.5(8) . . . . ? 
P1 Pt1 P2 C23 -142.9(3) . . . . ? 
S2 Pt1 P2 C23 31.0(3) . . . . ? 
S1 Pt1 P2 C23 78.5(9) . . . . ? 
B9 S1 C20 C21 -146.2(6) . . . . ? 
Pt1 S1 C20 C21 -28.3(6) . . . . ? 
S1 C20 C21 P1 54.1(7) . . . . ? 
C30 P1 C21 C20 174.9(6) . . . . ? 
C24 P1 C21 C20 60.5(6) . . . . ? 
Pt1 P1 C21 C20 -55.3(6) . . . . ? 
B9' S2 C22 C23 -141.7(6) . . . . ? 
Pt1 S2 C22 C23 -23.9(7) . . . . ? 
S2 C22 C23 P2 50.9(7) . . . . ? 
C42 P2 C23 C22 63.1(7) . . . . ? 
C36 P2 C23 C22 175.7(6) . . . . ? 
Pt1 P2 C23 C22 -55.2(6) . . . . ? 
C30 P1 C24 C25 112.1(7) . . . . ? 
C21 P1 C24 C25 -136.1(7) . . . . ? 
Pt1 P1 C24 C25 -24.1(7) . . . . ? 
C30 P1 C24 C29 -70.8(7) . . . . ? 
C21 P1 C24 C29 40.9(7) . . . . ? 
Pt1 P1 C24 C29 152.9(6) . . . . ? 
C29 C24 C25 C26 -0.6(12) . . . . ? 
P1 C24 C25 C26 176.5(6) . . . . ? 
C24 C25 C26 C27 0.2(13) . . . . ? 
C25 C26 C27 C28 0.6(13) . . . . ? 
C26 C27 C28 C29 -0.8(13) . . . . ? 
C27 C28 C29 C24 0.4(13) . . . . ? 
C25 C24 C29 C28 0.3(12) . . . . ? 
P1 C24 C29 C28 -176.7(6) . . . . ? 
C24 P1 C30 C35 172.3(6) . . . . ? 
C21 P1 C30 C35 59.2(7) . . . . ? 
Pt1 P1 C30 C35 -58.5(7) . . . . ? 
C24 P1 C30 C31 -5.2(8) . . . . ? 
C21 P1 C30 C31 -118.3(7) . . . . ? 
Pt1 P1 C30 C31 124.0(6) . . . . ? 
C35 C30 C31 C32 -0.3(12) . . . . ? 
P1 C30 C31 C32 177.2(6) . . . . ? 
C30 C31 C32 C33 1.2(12) . . . . ? 
C31 C32 C33 C34 -0.9(13) . . . . ? 
C32 C33 C34 C35 -0.3(12) . . . . ? 
C31 C30 C35 C34 -0.9(12) . . . . ? 
P1 C30 C35 C34 -178.5(6) . . . . ? 
C33 C34 C35 C30 1.2(12) . . . . ? 
C42 P2 C36 C41 -16.8(7) . . . . ? 
C23 P2 C36 C41 -130.2(7) . . . . ? 
Pt1 P2 C36 C41 111.7(6) . . . . ? 
C42 P2 C36 C37 164.9(6) . . . . ? 
C23 P2 C36 C37 51.5(7) . . . . ? 
Pt1 P2 C36 C37 -66.6(7) . . . . ? 
C41 C36 C37 C38 1.5(11) . . . . ? 
P2 C36 C37 C38 179.8(6) . . . . ? 
C36 C37 C38 C39 0.6(12) . . . . ? 
C37 C38 C39 C40 -2.0(12) . . . . ? 
C38 C39 C40 C41 1.2(12) . . . . ? 
C39 C40 C41 C36 1.0(13) . . . . ? 
C37 C36 C41 C40 -2.3(12) . . . . ? 
P2 C36 C41 C40 179.4(6) . . . . ? 
C36 P2 C42 C47 103.8(7) . . . . ? 
C23 P2 C42 C47 -143.5(7) . . . . ? 
Pt1 P2 C42 C47 -30.3(8) . . . . ? 
C36 P2 C42 C43 -77.3(7) . . . . ? 
C23 P2 C42 C43 35.4(8) . . . . ? 
Pt1 P2 C42 C43 148.6(6) . . . . ? 
C47 C42 C43 C44 -0.5(12) . . . . ? 
P2 C42 C43 C44 -179.5(6) . . . . ? 
C42 C43 C44 C45 -1.5(13) . . . . ? 
C43 C44 C45 C46 1.8(13) . . . . ? 
C44 C45 C46 C47 0.1(13) . . . . ? 
C45 C46 C47 C42 -2.1(12) . . . . ? 
C43 C42 C47 C46 2.4(12) . . . . ? 
P2 C42 C47 C46 -178.7(6) . . . . ? 
B11 C7 B2 C1 -4.9(9) . . . . ? 
B3 C7 B2 C1 -41.0(6) . . . . ? 
B12 C7 B2 C1 64.8(9) . . . . ? 
B8 C7 B2 C1 101.3(7) . . . . ? 
B11 C7 B2 B6 -65.5(9) . . . . ? 
B3 C7 B2 B6 -101.6(7) . . . . ? 
B12 C7 B2 B6 4.3(9) . . . . ? 
B8 C7 B2 B6 40.8(6) . . . . ? 
B11 C7 B2 B8 -106.2(8) . . . . ? 
B3 C7 B2 B8 -142.4(8) . . . . ? 
B12 C7 B2 B8 -36.5(7) . . . . ? 
B11 C7 B2 B3 36.1(7) . . . . ? 
B12 C7 B2 B3 105.8(8) . . . . ? 
B8 C7 B2 B3 142.4(8) . . . . ? 
B3 C1 B2 C7 41.4(6) . . . . ? 
B5 C1 B2 C7 -65.1(8) . . . . ? 
B6 C1 B2 C7 -100.7(7) . . . . ? 
B4 C1 B2 C7 4.4(9) . . . . ? 
B3 C1 B2 B6 142.1(7) . . . . ? 
B5 C1 B2 B6 35.6(7) . . . . ? 
B4 C1 B2 B6 105.0(7) . . . . ? 
B3 C1 B2 B8 102.0(7) . . . . ? 
B5 C1 B2 B8 -4.5(9) . . . . ? 
B6 C1 B2 B8 -40.1(6) . . . . ? 
B4 C1 B2 B8 64.9(9) . . . . ? 
B5 C1 B2 B3 -106.5(8) . . . . ? 
B6 C1 B2 B3 -142.1(7) . . . . ? 
B4 C1 B2 B3 -37.1(7) . . . . ? 
B5 C1 B3 C7 64.0(8) . . . . ? 
B6 C1 B3 C7 -5.2(9) . . . . ? 
B4 C1 B3 C7 100.1(8) . . . . ? 
B2 C1 B3 C7 -41.5(6) . . . . ? 
B5 C1 B3 B4 -36.0(7) . . . . ? 
B6 C1 B3 B4 -105.3(8) . . . . ? 
B2 C1 B3 B4 -141.5(8) . . . . ? 
B5 C1 B3 B11 4.0(9) . . . . ? 
B6 C1 B3 B11 -65.3(9) . . . . ? 
B4 C1 B3 B11 40.0(7) . . . . ? 
B2 C1 B3 B11 -101.6(8) . . . . ? 
B5 C1 B3 B2 105.5(8) . . . . ? 
B6 C1 B3 B2 36.2(7) . . . . ? 
B4 C1 B3 B2 141.5(8) . . . . ? 
B11 C7 B3 C1 -101.1(8) . . . . ? 
B2 C7 B3 C1 42.0(6) . . . . ? 
B12 C7 B3 C1 -64.7(8) . . . . ? 
B8 C7 B3 C1 5.3(9) . . . . ? 
B11 C7 B3 B4 -39.9(7) . . . . ? 
B2 C7 B3 B4 103.3(8) . . . . ? 
B12 C7 B3 B4 -3.5(10) . . . . ? 
B8 C7 B3 B4 66.5(9) . . . . ? 
B2 C7 B3 B11 143.2(8) . . . . ? 
B12 C7 B3 B11 36.5(7) . . . . ? 
B8 C7 B3 B11 106.4(8) . . . . ? 
B11 C7 B3 B2 -143.2(8) . . . . ? 
B12 C7 B3 B2 -106.7(8) . . . . ? 
B8 C7 B3 B2 -36.7(7) . . . . ? 
C7 B2 B3 C1 -130.1(7) . . . . ? 
B6 B2 B3 C1 -33.5(6) . . . . ? 
B8 B2 B3 C1 -96.8(8) . . . . ? 
C1 B2 B3 C7 130.1(7) . . . . ? 
B6 B2 B3 C7 96.7(7) . . . . ? 
B8 B2 B3 C7 33.4(7) . . . . ? 
C7 B2 B3 B4 -95.7(8) . . . . ? 
C1 B2 B3 B4 34.5(7) . . . . ? 
B6 B2 B3 B4 1.0(10) . . . . ? 
B8 B2 B3 B4 -62.3(9) . . . . ? 
C7 B2 B3 B11 -32.4(7) . . . . ? 
C1 B2 B3 B11 97.8(8) . . . . ? 
B6 B2 B3 B11 64.3(9) . . . . ? 
B8 B2 B3 B11 1.0(10) . . . . ? 
B3 C1 B4 B11 -40.0(7) . . . . ? 
B5 C1 B4 B11 103.0(8) . . . . ? 
B6 C1 B4 B11 65.7(9) . . . . ? 
B2 C1 B4 B11 -2.4(9) . . . . ? 
B5 C1 B4 B3 142.9(8) . . . . ? 
B6 C1 B4 B3 105.6(8) . . . . ? 
B2 C1 B4 B3 37.5(7) . . . . ? 
B3 C1 B4 B10 -103.8(8) . . . . ? 
B5 C1 B4 B10 39.1(7) . . . . ? 
B6 C1 B4 B10 1.8(10) . . . . ? 
B2 C1 B4 B10 -66.3(9) . . . . ? 
B3 C1 B4 B5 -142.9(8) . . . . ? 
B6 C1 B4 B5 -37.3(7) . . . . ? 
B2 C1 B4 B5 -105.4(8) . . . . ? 
C7 B3 B4 C1 -95.0(7) . . . . ? 
B11 B3 B4 C1 -134.2(7) . . . . ? 
B2 B3 B4 C1 -34.3(7) . . . . ? 
C1 B3 B4 B11 134.2(7) . . . . ? 
C7 B3 B4 B11 39.2(7) . . . . ? 
B2 B3 B4 B11 99.9(8) . . . . ? 
C1 B3 B4 B10 96.4(8) . . . . ? 
C7 B3 B4 B10 1.4(9) . . . . ? 
B11 B3 B4 B10 -37.8(7) . . . . ? 
B2 B3 B4 B10 62.1(9) . . . . ? 
C1 B3 B4 B5 32.6(7) . . . . ? 
C7 B3 B4 B5 -62.4(9) . . . . ? 
B11 B3 B4 B5 -101.6(8) . . . . ? 
B2 B3 B4 B5 -1.7(10) . . . . ? 
B3 C1 B5 B6 -105.4(7) . . . . ? 
B4 C1 B5 B6 -141.2(8) . . . . ? 
B2 C1 B5 B6 -35.3(7) . . . . ? 
B3 C1 B5 B9 -66.2(8) . . . . ? 
B6 C1 B5 B9 39.3(6) . . . . ? 
B4 C1 B5 B9 -102.0(8) . . . . ? 
B2 C1 B5 B9 4.0(9) . . . . ? 
B3 C1 B5 B10 -3.0(9) . . . . ? 
B6 C1 B5 B10 102.4(7) . . . . ? 
B4 C1 B5 B10 -38.9(7) . . . . ? 
B2 C1 B5 B10 67.1(8) . . . . ? 
B3 C1 B5 B4 35.8(7) . . . . ? 
B6 C1 B5 B4 141.2(8) . . . . ? 
B2 C1 B5 B4 106.0(8) . . . . ? 
B11 B4 B5 C1 -96.1(8) . . . . ? 
B3 B4 B5 C1 -32.5(7) . . . . ? 
B10 B4 B5 C1 -135.5(8) . . . . ? 
C1 B4 B5 B6 34.2(6) . . . . ? 
B11 B4 B5 B6 -61.9(9) . . . . ? 
B3 B4 B5 B6 1.7(10) . . . . ? 
B10 B4 B5 B6 -101.3(8) . . . . ? 
C1 B4 B5 B9 97.0(7) . . . . ? 
B11 B4 B5 B9 0.9(9) . . . . ? 
B3 B4 B5 B9 64.5(9) . . . . ? 
B10 B4 B5 B9 -38.4(7) . . . . ? 
C1 B4 B5 B10 135.5(8) . . . . ? 
B11 B4 B5 B10 39.4(7) . . . . ? 
B3 B4 B5 B10 103.0(8) . . . . ? 
B3 C1 B6 B2 -36.9(7) . . . . ? 
B5 C1 B6 B2 -143.1(7) . . . . ? 
B4 C1 B6 B2 -105.6(8) . . . . ? 
B3 C1 B6 B8 3.5(9) . . . . ? 
B5 C1 B6 B8 -102.7(7) . . . . ? 
B4 C1 B6 B8 -65.3(9) . . . . ? 
B2 C1 B6 B8 40.4(6) . . . . ? 
B3 C1 B6 B9 66.5(9) . . . . ? 
B5 C1 B6 B9 -39.7(7) . . . . ? 
B4 C1 B6 B9 -2.3(9) . . . . ? 
B2 C1 B6 B9 103.4(7) . . . . ? 
B3 C1 B6 B5 106.2(8) . . . . ? 
B4 C1 B6 B5 37.4(7) . . . . ? 
B2 C1 B6 B5 143.1(7) . . . . ? 
C7 B2 B6 C1 93.7(7) . . . . ? 
B8 B2 B6 C1 134.0(7) . . . . ? 
B3 B2 B6 C1 32.9(6) . . . . ? 
C7 B2 B6 B8 -40.3(6) . . . . ? 
C1 B2 B6 B8 -134.0(7) . . . . ? 
B3 B2 B6 B8 -101.1(8) . . . . ? 
C7 B2 B6 B9 -3.2(9) . . . . ? 
C1 B2 B6 B9 -96.9(7) . . . . ? 
B8 B2 B6 B9 37.1(7) . . . . ? 
B3 B2 B6 B9 -64.0(9) . . . . ? 
C7 B2 B6 B5 60.9(8) . . . . ? 
C1 B2 B6 B5 -32.8(6) . . . . ? 
B8 B2 B6 B5 101.2(8) . . . . ? 
B3 B2 B6 B5 0.1(9) . . . . ? 
B9 B5 B6 C1 -134.8(7) . . . . ? 
B10 B5 B6 C1 -97.2(7) . . . . ? 
B4 B5 B6 C1 -34.2(7) . . . . ? 
C1 B5 B6 B2 33.1(6) . . . . ? 
B9 B5 B6 B2 -101.7(8) . . . . ? 
B10 B5 B6 B2 -64.2(8) . . . . ? 
B4 B5 B6 B2 -1.1(9) . . . . ? 
C1 B5 B6 B8 97.1(7) . . . . ? 
B9 B5 B6 B8 -37.7(7) . . . . ? 
B10 B5 B6 B8 -0.1(9) . . . . ? 
B4 B5 B6 B8 62.9(9) . . . . ? 
C1 B5 B6 B9 134.8(7) . . . . ? 
B10 B5 B6 B9 37.6(7) . . . . ? 
B4 B5 B6 B9 100.6(8) . . . . ? 
B11 C7 B8 B6 66.5(9) . . . . ? 
B2 C7 B8 B6 -40.5(6) . . . . ? 
B3 C7 B8 B6 -3.4(9) . . . . ? 
B12 C7 B8 B6 102.1(8) . . . . ? 
B11 C7 B8 B2 107.0(8) . . . . ? 
B3 C7 B8 B2 37.1(7) . . . . ? 
B12 C7 B8 B2 142.6(8) . . . . ? 
B11 C7 B8 B9 4.6(10) . . . . ? 
B2 C7 B8 B9 -102.4(7) . . . . ? 
B3 C7 B8 B9 -65.3(9) . . . . ? 
B12 C7 B8 B9 40.1(7) . . . . ? 
B11 C7 B8 B12 -35.6(8) . . . . ? 
B2 C7 B8 B12 -142.6(8) . . . . ? 
B3 C7 B8 B12 -105.5(8) . . . . ? 
C1 B6 B8 C7 -0.1(8) . . . . ? 
B2 B6 B8 C7 39.9(6) . . . . ? 
B9 B6 B8 C7 -99.2(7) . . . . ? 
B5 B6 B8 C7 -61.6(8) . . . . ? 
C1 B6 B8 B2 -39.9(6) . . . . ? 
B9 B6 B8 B2 -139.1(8) . . . . ? 
B5 B6 B8 B2 -101.5(7) . . . . ? 
C1 B6 B8 B9 99.1(7) . . . . ? 
B2 B6 B8 B9 139.1(8) . . . . ? 
B5 B6 B8 B9 37.6(7) . . . . ? 
C1 B6 B8 B12 60.8(8) . . . . ? 
B2 B6 B8 B12 100.7(8) . . . . ? 
B9 B6 B8 B12 -38.3(7) . . . . ? 
B5 B6 B8 B12 -0.8(9) . . . . ? 
C1 B2 B8 C7 -93.4(7) . . . . ? 
B6 B2 B8 C7 -133.1(7) . . . . ? 
B3 B2 B8 C7 -33.1(7) . . . . ? 
C7 B2 B8 B6 133.1(7) . . . . ? 
C1 B2 B8 B6 39.7(6) . . . . ? 
B3 B2 B8 B6 99.9(8) . . . . ? 
C7 B2 B8 B9 96.5(8) . . . . ? 
C1 B2 B8 B9 3.1(9) . . . . ? 
B6 B2 B8 B9 -36.6(7) . . . . ? 
B3 B2 B8 B9 63.4(9) . . . . ? 
C7 B2 B8 B12 32.9(7) . . . . ? 
C1 B2 B8 B12 -60.4(8) . . . . ? 
B6 B2 B8 B12 -100.1(8) . . . . ? 
B3 B2 B8 B12 -0.2(10) . . . . ? 
C1 B6 B9 B8 -99.3(7) . . . . ? 
B2 B6 B9 B8 -37.0(7) . . . . ? 
B5 B6 B9 B8 -138.3(7) . . . . ? 
C1 B6 B9 B5 38.9(6) . . . . ? 
B2 B6 B9 B5 101.2(7) . . . . ? 
B8 B6 B9 B5 138.3(7) . . . . ? 
C1 B6 B9 B12 -61.1(9) . . . . ? 
B2 B6 B9 B12 1.2(9) . . . . ? 
B8 B6 B9 B12 38.2(7) . . . . ? 
B5 B6 B9 B12 -100.0(8) . . . . ? 
C1 B6 B9 B10 1.8(9) . . . . ? 
B2 B6 B9 B10 64.1(9) . . . . ? 
B8 B6 B9 B10 101.1(8) . . . . ? 
B5 B6 B9 B10 -37.1(7) . . . . ? 
C1 B6 B9 S1 153.8(6) . . . . ? 
B2 B6 B9 S1 -143.9(7) . . . . ? 
B8 B6 B9 S1 -106.8(8) . . . . ? 
B5 B6 B9 S1 114.9(8) . . . . ? 
C7 B8 B9 B6 97.6(7) . . . . ? 
B2 B8 B9 B6 36.5(7) . . . . ? 
B12 B8 B9 B6 137.0(8) . . . . ? 
C7 B8 B9 B5 60.2(8) . . . . ? 
B6 B8 B9 B5 -37.4(6) . . . . ? 
B2 B8 B9 B5 -0.9(9) . . . . ? 
B12 B8 B9 B5 99.5(8) . . . . ? 
C7 B8 B9 B12 -39.3(7) . . . . ? 
B6 B8 B9 B12 -137.0(8) . . . . ? 
B2 B8 B9 B12 -100.4(8) . . . . ? 
C7 B8 B9 B10 -3.0(9) . . . . ? 
B6 B8 B9 B10 -100.7(8) . . . . ? 
B2 B8 B9 B10 -64.1(9) . . . . ? 
B12 B8 B9 B10 36.3(7) . . . . ? 
C7 B8 B9 S1 -149.8(6) . . . . ? 
B6 B8 B9 S1 112.6(7) . . . . ? 
B2 B8 B9 S1 149.1(6) . . . . ? 
B12 B8 B9 S1 -110.5(8) . . . . ? 
C1 B5 B9 B6 -38.9(6) . . . . ? 
B10 B5 B9 B6 -138.4(7) . . . . ? 
B4 B5 B9 B6 -100.4(8) . . . . ? 
C1 B5 B9 B8 -1.8(9) . . . . ? 
B6 B5 B9 B8 37.2(7) . . . . ? 
B10 B5 B9 B8 -101.2(8) . . . . ? 
B4 B5 B9 B8 -63.2(9) . . . . ? 
C1 B5 B9 B12 61.4(8) . . . . ? 
B6 B5 B9 B12 100.4(7) . . . . ? 
B10 B5 B9 B12 -38.0(6) . . . . ? 
B4 B5 B9 B12 0.0(9) . . . . ? 
C1 B5 B9 B10 99.5(7) . . . . ? 
B6 B5 B9 B10 138.4(7) . . . . ? 
B4 B5 B9 B10 38.0(7) . . . . ? 
C1 B5 B9 S1 -149.3(6) . . . . ? 
B6 B5 B9 S1 -110.4(8) . . . . ? 
B10 B5 B9 S1 111.2(8) . . . . ? 
B4 B5 B9 S1 149.2(7) . . . . ? 
C20 S1 B9 B6 28.2(8) . . . . ? 
Pt1 S1 B9 B6 -84.1(7) . . . . ? 
C20 S1 B9 B8 -42.2(7) . . . . ? 
Pt1 S1 B9 B8 -154.5(6) . . . . ? 
C20 S1 B9 B5 102.2(7) . . . . ? 
Pt1 S1 B9 B5 -10.1(8) . . . . ? 
C20 S1 B9 B12 -112.4(7) . . . . ? 
Pt1 S1 B9 B12 135.3(6) . . . . ? 
C20 S1 B9 B10 176.1(7) . . . . ? 
Pt1 S1 B9 B10 63.8(8) . . . . ? 
C1 B4 B10 B5 -38.3(7) . . . . ? 
B11 B4 B10 B5 -136.8(8) . . . . ? 
B3 B4 B10 B5 -99.5(8) . . . . ? 
C1 B4 B10 B12 62.1(9) . . . . ? 
B11 B4 B10 B12 -36.3(7) . . . . ? 
B3 B4 B10 B12 0.9(10) . . . . ? 
B5 B4 B10 B12 100.5(8) . . . . ? 
C1 B4 B10 B9 -0.5(9) . . . . ? 
B11 B4 B10 B9 -99.0(8) . . . . ? 
B3 B4 B10 B9 -61.7(9) . . . . ? 
B5 B4 B10 B9 37.8(7) . . . . ? 
C1 B4 B10 B11 98.4(8) . . . . ? 
B3 B4 B10 B11 37.2(7) . . . . ? 
B5 B4 B10 B11 136.8(8) . . . . ? 
C1 B5 B10 B4 38.5(6) . . . . ? 
B6 B5 B10 B4 100.2(8) . . . . ? 
B9 B5 B10 B4 137.2(8) . . . . ? 
C1 B5 B10 B12 -60.8(8) . . . . ? 
B6 B5 B10 B12 1.0(9) . . . . ? 
B9 B5 B10 B12 38.0(7) . . . . ? 
B4 B5 B10 B12 -99.2(8) . . . . ? 
C1 B5 B10 B9 -98.8(7) . . . . ? 
B6 B5 B10 B9 -37.1(6) . . . . ? 
B4 B5 B10 B9 -137.2(8) . . . . ? 
C1 B5 B10 B11 0.8(9) . . . . ? 
B6 B5 B10 B11 62.5(9) . . . . ? 
B9 B5 B10 B11 99.6(8) . . . . ? 
B4 B5 B10 B11 -37.6(7) . . . . ? 
B6 B9 B10 B4 -0.8(10) . . . . ? 
B8 B9 B10 B4 62.4(9) . . . . ? 
B5 B9 B10 B4 -38.1(7) . . . . ? 
B12 B9 B10 B4 98.8(8) . . . . ? 
S1 B9 B10 B4 -152.6(7) . . . . ? 
B6 B9 B10 B5 37.3(7) . . . . ? 
B8 B9 B10 B5 100.5(7) . . . . ? 
B12 B9 B10 B5 136.9(7) . . . . ? 
S1 B9 B10 B5 -114.4(9) . . . . ? 
B6 B9 B10 B12 -99.6(8) . . . . ? 
B8 B9 B10 B12 -36.4(7) . . . . ? 
B5 B9 B10 B12 -136.9(7) . . . . ? 
S1 B9 B10 B12 108.6(8) . . . . ? 
B6 B9 B10 B11 -62.5(9) . . . . ? 
B8 B9 B10 B11 0.7(10) . . . . ? 
B5 B9 B10 B11 -99.8(8) . . . . ? 
B12 B9 B10 B11 37.1(7) . . . . ? 
S1 B9 B10 B11 145.8(7) . . . . ? 
B2 C7 B11 B4 3.7(10) . . . . ? 
B3 C7 B11 B4 40.2(7) . . . . ? 
B12 C7 B11 B4 -102.1(8) . . . . ? 
B8 C7 B11 B4 -66.3(9) . . . . ? 
B2 C7 B11 B12 105.8(8) . . . . ? 
B3 C7 B11 B12 142.2(8) . . . . ? 
B8 C7 B11 B12 35.7(7) . . . . ? 
B2 C7 B11 B3 -36.5(7) . . . . ? 
B12 C7 B11 B3 -142.2(8) . . . . ? 
B8 C7 B11 B3 -106.5(8) . . . . ? 
B2 C7 B11 B10 65.8(9) . . . . ? 
B3 C7 B11 B10 102.3(8) . . . . ? 
B12 C7 B11 B10 -39.9(7) . . . . ? 
B8 C7 B11 B10 -4.2(10) . . . . ? 
C1 B4 B11 C7 -0.7(9) . . . . ? 
B3 B4 B11 C7 -39.7(7) . . . . ? 
B10 B4 B11 C7 99.2(8) . . . . ? 
B5 B4 B11 C7 60.5(9) . . . . ? 
C1 B4 B11 B12 -62.6(9) . . . . ? 
B3 B4 B11 B12 -101.6(8) . . . . ? 
B10 B4 B11 B12 37.3(7) . . . . ? 
B5 B4 B11 B12 -1.5(10) . . . . ? 
C1 B4 B11 B3 39.0(6) . . . . ? 
B10 B4 B11 B3 138.9(8) . . . . ? 
B5 B4 B11 B3 100.2(8) . . . . ? 
C1 B4 B11 B10 -99.9(7) . . . . ? 
B3 B4 B11 B10 -138.9(8) . . . . ? 
B5 B4 B11 B10 -38.8(7) . . . . ? 
C1 B3 B11 C7 94.2(7) . . . . ? 
B4 B3 B11 C7 134.0(8) . . . . ? 
B2 B3 B11 C7 32.3(7) . . . . ? 
C1 B3 B11 B4 -39.9(7) . . . . ? 
C7 B3 B11 B4 -134.0(8) . . . . ? 
B2 B3 B11 B4 -101.8(8) . . . . ? 
C1 B3 B11 B12 60.4(9) . . . . ? 
C7 B3 B11 B12 -33.7(7) . . . . ? 
B4 B3 B11 B12 100.3(8) . . . . ? 
B2 B3 B11 B12 -1.4(10) . . . . ? 
C1 B3 B11 B10 -3.2(9) . . . . ? 
C7 B3 B11 B10 -97.3(8) . . . . ? 
B4 B3 B11 B10 36.7(7) . . . . ? 
B2 B3 B11 B10 -65.1(9) . . . . ? 
B4 B10 B11 C7 -98.7(8) . . . . ? 
B5 B10 B11 C7 -60.4(9) . . . . ? 
B12 B10 B11 C7 39.5(7) . . . . ? 
B9 B10 B11 C7 1.9(9) . . . . ? 
B5 B10 B11 B4 38.3(7) . . . . ? 
B12 B10 B11 B4 138.2(8) . . . . ? 
B9 B10 B11 B4 100.6(8) . . . . ? 
B4 B10 B11 B12 -138.2(8) . . . . ? 
B5 B10 B11 B12 -99.9(8) . . . . ? 
B9 B10 B11 B12 -37.6(7) . . . . ? 
B4 B10 B11 B3 -36.8(7) . . . . ? 
B5 B10 B11 B3 1.5(10) . . . . ? 
B12 B10 B11 B3 101.4(8) . . . . ? 
B9 B10 B11 B3 63.8(9) . . . . ? 
B2 C7 B12 B11 -107.1(8) . . . . ? 
B3 C7 B12 B11 -36.5(7) . . . . ? 
B8 C7 B12 B11 -143.5(8) . . . . ? 
B11 C7 B12 B8 143.5(8) . . . . ? 
B2 C7 B12 B8 36.4(7) . . . . ? 
B3 C7 B12 B8 107.0(8) . . . . ? 
B11 C7 B12 B10 40.6(7) . . . . ? 
B2 C7 B12 B10 -66.5(9) . . . . ? 
B3 C7 B12 B10 4.1(10) . . . . ? 
B8 C7 B12 B10 -102.9(8) . . . . ? 
B11 C7 B12 B9 103.6(8) . . . . ? 
B2 C7 B12 B9 -3.6(10) . . . . ? 
B3 C7 B12 B9 67.0(9) . . . . ? 
B8 C7 B12 B9 -39.9(7) . . . . ? 
B4 B11 B12 C7 97.2(8) . . . . ? 
B3 B11 B12 C7 33.6(7) . . . . ? 
B10 B11 B12 C7 134.4(8) . . . . ? 
C7 B11 B12 B8 -32.3(7) . . . . ? 
B4 B11 B12 B8 64.9(9) . . . . ? 
B3 B11 B12 B8 1.3(10) . . . . ? 
B10 B11 B12 B8 102.1(8) . . . . ? 
C7 B11 B12 B10 -134.4(8) . . . . ? 
B4 B11 B12 B10 -37.2(7) . . . . ? 
B3 B11 B12 B10 -100.8(8) . . . . ? 
C7 B11 B12 B9 -95.8(8) . . . . ? 
B4 B11 B12 B9 1.4(10) . . . . ? 
B3 B11 B12 B9 -62.1(10) . . . . ? 
B10 B11 B12 B9 38.6(7) . . . . ? 
B6 B8 B12 C7 -95.9(7) . . . . ? 
B2 B8 B12 C7 -32.9(7) . . . . ? 
B9 B8 B12 C7 -134.0(8) . . . . ? 
C7 B8 B12 B11 32.2(7) . . . . ? 
B6 B8 B12 B11 -63.6(9) . . . . ? 
B2 B8 B12 B11 -0.7(10) . . . . ? 
B9 B8 B12 B11 -101.8(8) . . . . ? 
C7 B8 B12 B10 97.2(8) . . . . ? 
B6 B8 B12 B10 1.4(9) . . . . ? 
B2 B8 B12 B10 64.3(9) . . . . ? 
B9 B8 B12 B10 -36.8(7) . . . . ? 
C7 B8 B12 B9 134.0(8) . . . . ? 
B6 B8 B12 B9 38.2(7) . . . . ? 
B2 B8 B12 B9 101.1(8) . . . . ? 
B4 B10 B12 C7 -2.9(9) . . . . ? 
B5 B10 B12 C7 60.2(8) . . . . ? 
B9 B10 B12 C7 98.1(7) . . . . ? 
B11 B10 B12 C7 -39.2(7) . . . . ? 
B4 B10 B12 B11 36.3(7) . . . . ? 
B5 B10 B12 B11 99.4(8) . . . . ? 
B9 B10 B12 B11 137.3(8) . . . . ? 
B4 B10 B12 B8 -64.5(9) . . . . ? 
B5 B10 B12 B8 -1.4(9) . . . . ? 
B9 B10 B12 B8 36.5(7) . . . . ? 
B11 B10 B12 B8 -100.8(8) . . . . ? 
B4 B10 B12 B9 -101.0(8) . . . . ? 
B5 B10 B12 B9 -37.9(6) . . . . ? 
B11 B10 B12 B9 -137.3(8) . . . . ? 
B6 B9 B12 C7 1.3(10) . . . . ? 
B8 B9 B12 C7 39.4(7) . . . . ? 
B5 B9 B12 C7 -62.0(9) . . . . ? 
B10 B9 B12 C7 -100.1(8) . . . . ? 
S1 B9 B12 C7 147.1(6) . . . . ? 
B6 B9 B12 B11 62.4(9) . . . . ? 
B8 B9 B12 B11 100.5(8) . . . . ? 
B5 B9 B12 B11 -0.9(9) . . . . ? 
B10 B9 B12 B11 -38.9(7) . . . . ? 
S1 B9 B12 B11 -151.8(7) . . . . ? 
B6 B9 B12 B8 -38.1(7) . . . . ? 
B5 B9 B12 B8 -101.3(7) . . . . ? 
B10 B9 B12 B8 -139.4(8) . . . . ? 
S1 B9 B12 B8 107.7(8) . . . . ? 
B6 B9 B12 B10 101.3(8) . . . . ? 
B8 B9 B12 B10 139.4(8) . . . . ? 
B5 B9 B12 B10 38.1(7) . . . . ? 
S1 B9 B12 B10 -112.9(8) . . . . ? 
B3' C7' B2' C1' -41.7(6) . . . . ? 
B11' C7' B2' C1' -6.2(9) . . . . ? 
B12' C7' B2' C1' 65.1(8) . . . . ? 
B8' C7' B2' C1' 101.2(7) . . . . ? 
B11' C7' B2' B3' 35.4(7) . . . . ? 
B12' C7' B2' B3' 106.8(8) . . . . ? 
B8' C7' B2' B3' 142.9(7) . . . . ? 
B3' C7' B2' B8' -142.9(7) . . . . ? 
B11' C7' B2' B8' -107.5(8) . . . . ? 
B12' C7' B2' B8' -36.2(7) . . . . ? 
B3' C7' B2' B6' -101.7(8) . . . . ? 
B11' C7' B2' B6' -66.2(9) . . . . ? 
B12' C7' B2' B6' 5.1(10) . . . . ? 
B8' C7' B2' B6' 41.3(7) . . . . ? 
B3' C1' B2' C7' 41.8(6) . . . . ? 
B5' C1' B2' C7' -64.1(9) . . . . ? 
B6' C1' B2' C7' -100.8(7) . . . . ? 
B4' C1' B2' C7' 5.4(9) . . . . ? 
B5' C1' B2' B3' -105.9(8) . . . . ? 
B6' C1' B2' B3' -142.7(8) . . . . ? 
B4' C1' B2' B3' -36.4(7) . . . . ? 
B3' C1' B2' B8' 102.4(8) . . . . ? 
B5' C1' B2' B8' -3.5(10) . . . . ? 
B6' C1' B2' B8' -40.2(7) . . . . ? 
B4' C1' B2' B8' 66.0(9) . . . . ? 
B3' C1' B2' B6' 142.7(8) . . . . ? 
B5' C1' B2' B6' 36.7(7) . . . . ? 
B4' C1' B2' B6' 106.2(8) . . . . ? 
B5' C1' B3' C7' 63.9(8) . . . . ? 
B2' C1' B3' C7' -42.3(6) . . . . ? 
B6' C1' B3' C7' -5.6(9) . . . . ? 
B4' C1' B3' C7' 100.7(7) . . . . ? 
B5' C1' B3' B11' 3.2(10) . . . . ? 
B2' C1' B3' B11' -103.1(8) . . . . ? 
B6' C1' B3' B11' -66.4(9) . . . . ? 
B4' C1' B3' B11' 39.9(6) . . . . ? 
B5' C1' B3' B2' 106.3(8) . . . . ? 
B6' C1' B3' B2' 36.7(7) . . . . ? 
B4' C1' B3' B2' 143.0(8) . . . . ? 
B5' C1' B3' B4' -36.7(7) . . . . ? 
B2' C1' B3' B4' -143.0(8) . . . . ? 
B6' C1' B3' B4' -106.3(8) . . . . ? 
B11' C7' B3' C1' -101.1(7) . . . . ? 
B12' C7' B3' C1' -64.5(8) . . . . ? 
B2' C7' B3' C1' 42.5(6) . . . . ? 
B8' C7' B3' C1' 6.3(9) . . . . ? 
B12' C7' B3' B11' 36.6(7) . . . . ? 
B2' C7' B3' B11' 143.6(8) . . . . ? 
B8' C7' B3' B11' 107.4(8) . . . . ? 
B11' C7' B3' B2' -143.6(8) . . . . ? 
B12' C7' B3' B2' -107.0(8) . . . . ? 
B8' C7' B3' B2' -36.2(7) . . . . ? 
B11' C7' B3' B4' -40.2(6) . . . . ? 
B12' C7' B3' B4' -3.6(9) . . . . ? 
B2' C7' B3' B4' 103.4(8) . . . . ? 
B8' C7' B3' B4' 67.2(8) . . . . ? 
C7' B2' B3' C1' -129.4(7) . . . . ? 
B8' B2' B3' C1' -96.4(8) . . . . ? 
B6' B2' B3' C1' -32.8(7) . . . . ? 
C1' B2' B3' C7' 129.4(7) . . . . ? 
B8' B2' B3' C7' 33.0(7) . . . . ? 
B6' B2' B3' C7' 96.6(8) . . . . ? 
C7' B2' B3' B11' -32.5(7) . . . . ? 
C1' B2' B3' B11' 96.9(8) . . . . ? 
B8' B2' B3' B11' 0.5(10) . . . . ? 
B6' B2' B3' B11' 64.0(9) . . . . ? 
C7' B2' B3' B4' -96.3(8) . . . . ? 
C1' B2' B3' B4' 33.1(7) . . . . ? 
B8' B2' B3' B4' -63.3(9) . . . . ? 
B6' B2' B3' B4' 0.3(10) . . . . ? 
B3' C1' B4' B5' -142.0(8) . . . . ? 
B2' C1' B4' B5' -105.5(8) . . . . ? 
B6' C1' B4' B5' -35.0(7) . . . . ? 
B3' C1' B4' B11' -39.2(7) . . . . ? 
B5' C1' B4' B11' 102.7(7) . . . . ? 
B2' C1' B4' B11' -2.8(10) . . . . ? 
B6' C1' B4' B11' 67.7(9) . . . . ? 
B5' C1' B4' B3' 142.0(8) . . . . ? 
B2' C1' B4' B3' 36.4(7) . . . . ? 
B6' C1' B4' B3' 107.0(8) . . . . ? 
B3' C1' B4' B10' -102.1(7) . . . . ? 
B5' C1' B4' B10' 39.8(6) . . . . ? 
B2' C1' B4' B10' -65.7(9) . . . . ? 
B6' C1' B4' B10' 4.8(9) . . . . ? 
C7' B3' B4' C1' -94.6(7) . . . . ? 
B11' B3' B4' C1' -134.4(7) . . . . ? 
B2' B3' B4' C1' -33.1(7) . . . . ? 
C1' B3' B4' B5' 33.2(7) . . . . ? 
C7' B3' B4' B5' -61.4(8) . . . . ? 
B11' B3' B4' B5' -101.2(8) . . . . ? 
B2' B3' B4' B5' 0.1(10) . . . . ? 
C1' B3' B4' B11' 134.4(7) . . . . ? 
C7' B3' B4' B11' 39.8(6) . . . . ? 
B2' B3' B4' B11' 101.3(8) . . . . ? 
C1' B3' B4' B10' 95.9(7) . . . . ? 
C7' B3' B4' B10' 1.3(9) . . . . ? 
B11' B3' B4' B10' -38.4(7) . . . . ? 
B2' B3' B4' B10' 62.9(9) . . . . ? 
B3' C1' B5' B4' 37.0(7) . . . . ? 
B2' C1' B5' B4' 107.1(8) . . . . ? 
B6' C1' B5' B4' 144.0(7) . . . . ? 
B3' C1' B5' B6' -107.0(8) . . . . ? 
B2' C1' B5' B6' -37.0(7) . . . . ? 
B4' C1' B5' B6' -144.0(7) . . . . ? 
B3' C1' B5' B10' -3.8(10) . . . . ? 
B2' C1' B5' B10' 66.3(9) . . . . ? 
B6' C1' B5' B10' 103.2(8) . . . . ? 
B4' C1' B5' B10' -40.8(7) . . . . ? 
B3' C1' B5' B9' -66.3(9) . . . . ? 
B2' C1' B5' B9' 3.8(10) . . . . ? 
B6' C1' B5' B9' 40.7(7) . . . . ? 
B4' C1' B5' B9' -103.3(7) . . . . ? 
B11' B4' B5' C1' -95.3(7) . . . . ? 
B3' B4' B5' C1' -32.9(7) . . . . ? 
B10' B4' B5' C1' -134.0(7) . . . . ? 
C1' B4' B5' B6' 32.5(7) . . . . ? 
B11' B4' B5' B6' -62.8(9) . . . . ? 
B3' B4' B5' B6' -0.5(10) . . . . ? 
B10' B4' B5' B6' -101.6(8) . . . . ? 
C1' B4' B5' B10' 134.0(7) . . . . ? 
B11' B4' B5' B10' 38.7(7) . . . . ? 
B3' B4' B5' B10' 101.1(8) . . . . ? 
C1' B4' B5' B9' 96.3(8) . . . . ? 
B11' B4' B5' B9' 1.0(9) . . . . ? 
B3' B4' B5' B9' 63.4(9) . . . . ? 
B10' B4' B5' B9' -37.7(7) . . . . ? 
B3' C1' B6' B5' 105.4(8) . . . . ? 
B2' C1' B6' B5' 142.1(8) . . . . ? 
B4' C1' B6' B5' 34.9(7) . . . . ? 
B3' C1' B6' B9' 64.6(9) . . . . ? 
B5' C1' B6' B9' -40.8(7) . . . . ? 
B2' C1' B6' B9' 101.3(8) . . . . ? 
B4' C1' B6' B9' -5.8(10) . . . . ? 
B3' C1' B6' B2' -36.7(7) . . . . ? 
B5' C1' B6' B2' -142.1(8) . . . . ? 
B4' C1' B6' B2' -107.2(8) . . . . ? 
B3' C1' B6' B8' 3.0(10) . . . . ? 
B5' C1' B6' B8' -102.4(7) . . . . ? 
B2' C1' B6' B8' 39.7(7) . . . . ? 
B4' C1' B6' B8' -67.4(9) . . . . ? 
B4' B5' B6' C1' -32.5(7) . . . . ? 
B10' B5' B6' C1' -97.6(8) . . . . ? 
B9' B5' B6' C1' -133.1(7) . . . . ? 
C1' B5' B6' B9' 133.1(7) . . . . ? 
B4' B5' B6' B9' 100.6(8) . . . . ? 
B10' B5' B6' B9' 35.6(7) . . . . ? 
C1' B5' B6' B2' 33.2(7) . . . . ? 
B4' B5' B6' B2' 0.7(10) . . . . ? 
B10' B5' B6' B2' -64.4(9) . . . . ? 
B9' B5' B6' B2' -100.0(8) . . . . ? 
C1' B5' B6' B8' 95.9(8) . . . . ? 
B4' B5' B6' B8' 63.4(9) . . . . ? 
B10' B5' B6' B8' -1.7(10) . . . . ? 
B9' B5' B6' B8' -37.2(7) . . . . ? 
C7' B2' B6' C1' 93.3(7) . . . . ? 
B3' B2' B6' C1' 32.6(7) . . . . ? 
B8' B2' B6' C1' 134.0(8) . . . . ? 
C7' B2' B6' B5' 60.1(9) . . . . ? 
C1' B2' B6' B5' -33.2(7) . . . . ? 
B3' B2' B6' B5' -0.6(10) . . . . ? 
B8' B2' B6' B5' 100.8(8) . . . . ? 
C7' B2' B6' B9' -3.2(9) . . . . ? 
C1' B2' B6' B9' -96.5(8) . . . . ? 
B3' B2' B6' B9' -63.9(9) . . . . ? 
B8' B2' B6' B9' 37.5(7) . . . . ? 
C7' B2' B6' B8' -40.7(6) . . . . ? 
C1' B2' B6' B8' -134.0(8) . . . . ? 
B3' B2' B6' B8' -101.4(8) . . . . ? 
B3' C7' B8' B9' -66.2(9) . . . . ? 
B11' C7' B8' B9' 3.7(10) . . . . ? 
B12' C7' B8' B9' 40.8(7) . . . . ? 
B2' C7' B8' B9' -102.6(8) . . . . ? 
B3' C7' B8' B2' 36.4(7) . . . . ? 
B11' C7' B8' B2' 106.2(8) . . . . ? 
B12' C7' B8' B2' 143.3(8) . . . . ? 
B3' C7' B8' B6' -4.7(9) . . . . ? 
B11' C7' B8' B6' 65.1(9) . . . . ? 
B12' C7' B8' B6' 102.2(7) . . . . ? 
B2' C7' B8' B6' -41.1(7) . . . . ? 
B3' C7' B8' B12' -106.9(8) . . . . ? 
B11' C7' B8' B12' -37.1(7) . . . . ? 
B2' C7' B8' B12' -143.3(8) . . . . ? 
C1' B2' B8' C7' -93.2(7) . . . . ? 
B3' B2' B8' C7' -32.6(7) . . . . ? 
B6' B2' B8' C7' -132.6(7) . . . . ? 
C7' B2' B8' B9' 95.0(7) . . . . ? 
C1' B2' B8' B9' 1.8(9) . . . . ? 
B3' B2' B8' B9' 62.3(9) . . . . ? 
B6' B2' B8' B9' -37.7(7) . . . . ? 
C7' B2' B8' B6' 132.6(7) . . . . ? 
C1' B2' B8' B6' 39.4(7) . . . . ? 
B3' B2' B8' B6' 100.0(8) . . . . ? 
C7' B2' B8' B12' 32.0(7) . . . . ? 
C1' B2' B8' B12' -61.2(9) . . . . ? 
B3' B2' B8' B12' -0.6(10) . . . . ? 
B6' B2' B8' B12' -100.6(8) . . . . ? 
C1' B6' B8' C7' 0.9(9) . . . . ? 
B5' B6' B8' C7' -59.8(8) . . . . ? 
B9' B6' B8' C7' -97.4(7) . . . . ? 
B2' B6' B8' C7' 40.1(6) . . . . ? 
C1' B6' B8' B9' 98.3(7) . . . . ? 
B5' B6' B8' B9' 37.5(7) . . . . ? 
B2' B6' B8' B9' 137.5(8) . . . . ? 
C1' B6' B8' B2' -39.2(7) . . . . ? 
B5' B6' B8' B2' -99.9(8) . . . . ? 
B9' B6' B8' B2' -137.5(8) . . . . ? 
C1' B6' B8' B12' 61.2(8) . . . . ? 
B5' B6' B8' B12' 0.4(9) . . . . ? 
B9' B6' B8' B12' -37.1(7) . . . . ? 
B2' B6' B8' B12' 100.4(8) . . . . ? 
C7' B8' B9' B6' 98.4(8) . . . . ? 
B2' B8' B9' B6' 38.0(7) . . . . ? 
B12' B8' B9' B6' 138.2(8) . . . . ? 
C7' B8' B9' B5' 60.9(9) . . . . ? 
B2' B8' B9' B5' 0.4(9) . . . . ? 
B6' B8' B9' B5' -37.6(7) . . . . ? 
B12' B8' B9' B5' 100.7(8) . . . . ? 
C7' B8' B9' B10' -2.9(10) . . . . ? 
B2' B8' B9' B10' -63.4(9) . . . . ? 
B6' B8' B9' B10' -101.4(8) . . . . ? 
B12' B8' B9' B10' 36.9(7) . . . . ? 
C7' B8' B9' B12' -39.8(6) . . . . ? 
B2' B8' B9' B12' -100.3(8) . . . . ? 
B6' B8' B9' B12' -138.2(8) . . . . ? 
C7' B8' B9' S2 -154.1(7) . . . . ? 
B2' B8' B9' S2 145.4(7) . . . . ? 
B6' B8' B9' S2 107.5(8) . . . . ? 
B12' B8' B9' S2 -114.3(8) . . . . ? 
C1' B6' B9' B8' -98.2(8) . . . . ? 
B5' B6' B9' B8' -138.1(8) . . . . ? 
B2' B6' B9' B8' -37.5(7) . . . . ? 
C1' B6' B9' B5' 39.8(7) . . . . ? 
B2' B6' B9' B5' 100.5(8) . . . . ? 
B8' B6' B9' B5' 138.1(8) . . . . ? 
C1' B6' B9' B10' 4.3(9) . . . . ? 
B5' B6' B9' B10' -35.5(7) . . . . ? 
B2' B6' B9' B10' 65.1(9) . . . . ? 
B8' B6' B9' B10' 102.6(8) . . . . ? 
C1' B6' B9' B12' -60.2(9) . . . . ? 
B5' B6' B9' B12' -100.0(8) . . . . ? 
B2' B6' B9' B12' 0.6(10) . . . . ? 
B8' B6' B9' B12' 38.1(7) . . . . ? 
C1' B6' B9' S2 147.8(6) . . . . ? 
B5' B6' B9' S2 108.0(8) . . . . ? 
B2' B6' B9' S2 -151.5(7) . . . . ? 
B8' B6' B9' S2 -114.0(8) . . . . ? 
C1' B5' B9' B8' -2.4(9) . . . . ? 
B4' B5' B9' B8' -64.6(9) . . . . ? 
B6' B5' B9' B8' 38.0(7) . . . . ? 
B10' B5' B9' B8' -102.7(7) . . . . ? 
C1' B5' B9' B6' -40.4(7) . . . . ? 
B4' B5' B9' B6' -102.6(8) . . . . ? 
B10' B5' B9' B6' -140.7(8) . . . . ? 
C1' B5' B9' B10' 100.3(8) . . . . ? 
B4' B5' B9' B10' 38.1(7) . . . . ? 
B6' B5' B9' B10' 140.7(8) . . . . ? 
C1' B5' B9' B12' 62.1(9) . . . . ? 
B4' B5' B9' B12' -0.1(9) . . . . ? 
B6' B5' B9' B12' 102.5(8) . . . . ? 
B10' B5' B9' B12' -38.2(7) . . . . ? 
C1' B5' B9' S2 -149.3(6) . . . . ? 
B4' B5' B9' S2 148.5(7) . . . . ? 
B6' B5' B9' S2 -108.9(7) . . . . ? 
B10' B5' B9' S2 110.5(8) . . . . ? 
C22 S2 B9' B8' 117.7(8) . . . . ? 
Pt1 S2 B9' B8' 4.5(8) . . . . ? 
C22 S2 B9' B6' -169.9(7) . . . . ? 
Pt1 S2 B9' B6' 76.9(7) . . . . ? 
C22 S2 B9' B5' -100.5(7) . . . . ? 
Pt1 S2 B9' B5' 146.3(6) . . . . ? 
C22 S2 B9' B10' -30.6(8) . . . . ? 
Pt1 S2 B9' B10' -143.8(6) . . . . ? 
C22 S2 B9' B12' 42.6(8) . . . . ? 
Pt1 S2 B9' B12' -70.6(8) . . . . ? 
C1' B5' B10' B9' -97.9(7) . . . . ? 
B4' B5' B10' B9' -138.0(7) . . . . ? 
B6' B5' B10' B9' -35.5(7) . . . . ? 
C1' B5' B10' B12' -60.2(9) . . . . ? 
B4' B5' B10' B12' -100.3(7) . . . . ? 
B6' B5' B10' B12' 2.2(9) . . . . ? 
B9' B5' B10' B12' 37.7(6) . . . . ? 
C1' B5' B10' B4' 40.1(6) . . . . ? 
B6' B5' B10' B4' 102.5(8) . . . . ? 
B9' B5' B10' B4' 138.0(7) . . . . ? 
C1' B5' B10' B11' 2.7(9) . . . . ? 
B4' B5' B10' B11' -37.4(6) . . . . ? 
B6' B5' B10' B11' 65.1(9) . . . . ? 
B9' B5' B10' B11' 100.6(7) . . . . ? 
B8' B9' B10' B5' 100.4(8) . . . . ? 
B6' B9' B10' B5' 35.4(7) . . . . ? 
B12' B9' B10' B5' 137.5(7) . . . . ? 
S2 B9' B10' B5' -107.4(8) . . . . ? 
B8' B9' B10' B12' -37.0(7) . . . . ? 
B6' B9' B10' B12' -102.0(8) . . . . ? 
B5' B9' B10' B12' -137.5(7) . . . . ? 
S2 B9' B10' B12' 115.1(8) . . . . ? 
B8' B9' B10' B4' 63.3(9) . . . . ? 
B6' B9' B10' B4' -1.7(9) . . . . ? 
B5' B9' B10' B4' -37.1(6) . . . . ? 
B12' B9' B10' B4' 100.4(7) . . . . ? 
S2 B9' B10' B4' -144.6(6) . . . . ? 
B8' B9' B10' B11' 1.4(10) . . . . ? 
B6' B9' B10' B11' -63.6(9) . . . . ? 
B5' B9' B10' B11' -99.0(7) . . . . ? 
B12' B9' B10' B11' 38.4(7) . . . . ? 
S2 B9' B10' B11' 153.5(6) . . . . ? 
C1' B4' B10' B5' -39.1(6) . . . . ? 
B11' B4' B10' B5' -137.0(7) . . . . ? 
B3' B4' B10' B5' -99.3(7) . . . . ? 
C1' B4' B10' B9' -1.7(9) . . . . ? 
B5' B4' B10' B9' 37.4(7) . . . . ? 
B11' B4' B10' B9' -99.6(7) . . . . ? 
B3' B4' B10' B9' -61.9(8) . . . . ? 
C1' B4' B10' B12' 61.2(8) . . . . ? 
B5' B4' B10' B12' 100.4(8) . . . . ? 
B11' B4' B10' B12' -36.7(6) . . . . ? 
B3' B4' B10' B12' 1.1(9) . . . . ? 
C1' B4' B10' B11' 97.9(7) . . . . ? 
B5' B4' B10' B11' 137.0(7) . . . . ? 
B3' B4' B10' B11' 37.7(7) . . . . ? 
B12' C7' B11' B3' -143.0(7) . . . . ? 
B2' C7' B11' B3' -35.8(7) . . . . ? 
B8' C7' B11' B3' -106.0(8) . . . . ? 
B3' C7' B11' B4' 40.7(7) . . . . ? 
B12' C7' B11' B4' -102.3(8) . . . . ? 
B2' C7' B11' B4' 4.9(9) . . . . ? 
B8' C7' B11' B4' -65.4(9) . . . . ? 
B3' C7' B11' B12' 143.0(7) . . . . ? 
B2' C7' B11' B12' 107.2(8) . . . . ? 
B8' C7' B11' B12' 36.9(8) . . . . ? 
B3' C7' B11' B10' 103.2(8) . . . . ? 
B12' C7' B11' B10' -39.8(7) . . . . ? 
B2' C7' B11' B10' 67.4(9) . . . . ? 
B8' C7' B11' B10' -2.9(10) . . . . ? 
C1' B3' B11' C7' 94.3(7) . . . . ? 
B2' B3' B11' C7' 32.4(7) . . . . ? 
B4' B3' B11' C7' 133.9(7) . . . . ? 
C1' B3' B11' B4' -39.6(6) . . . . ? 
C7' B3' B11' B4' -133.9(7) . . . . ? 
B2' B3' B11' B4' -101.5(8) . . . . ? 
C1' B3' B11' B12' 61.8(8) . . . . ? 
C7' B3' B11' B12' -32.5(6) . . . . ? 
B2' B3' B11' B12' -0.1(10) . . . . ? 
B4' B3' B11' B12' 101.4(8) . . . . ? 
C1' B3' B11' B10' -1.2(9) . . . . ? 
C7' B3' B11' B10' -95.6(7) . . . . ? 
B2' B3' B11' B10' -63.2(9) . . . . ? 
B4' B3' B11' B10' 38.3(7) . . . . ? 
C1' B4' B11' C7' -1.2(8) . . . . ? 
B5' B4' B11' C7' 59.5(9) . . . . ? 
B3' B4' B11' C7' -39.6(6) . . . . ? 
B10' B4' B11' C7' 97.7(7) . . . . ? 
C1' B4' B11' B3' 38.5(6) . . . . ? 
B5' B4' B11' B3' 99.1(8) . . . . ? 
B10' B4' B11' B3' 137.3(7) . . . . ? 
C1' B4' B11' B12' -62.1(8) . . . . ? 
B5' B4' B11' B12' -1.5(9) . . . . ? 
B3' B4' B11' B12' -100.6(8) . . . . ? 
B10' B4' B11' B12' 36.7(7) . . . . ? 
C1' B4' B11' B10' -98.8(7) . . . . ? 
B5' B4' B11' B10' -38.2(7) . . . . ? 
B3' B4' B11' B10' -137.3(7) . . . . ? 
B5' B10' B11' C7' -62.1(8) . . . . ? 
B9' B10' B11' C7' 0.8(9) . . . . ? 
B12' B10' B11' C7' 39.1(6) . . . . ? 
B4' B10' B11' C7' -99.8(7) . . . . ? 
B5' B10' B11' B3' -0.9(9) . . . . ? 
B9' B10' B11' B3' 62.0(8) . . . . ? 
B12' B10' B11' B3' 100.3(8) . . . . ? 
B4' B10' B11' B3' -38.6(7) . . . . ? 
B5' B10' B11' B4' 37.6(6) . . . . ? 
B9' B10' B11' B4' 100.5(7) . . . . ? 
B12' B10' B11' B4' 138.9(7) . . . . ? 
B5' B10' B11' B12' -101.2(8) . . . . ? 
B9' B10' B11' B12' -38.3(7) . . . . ? 
B4' B10' B11' B12' -138.9(7) . . . . ? 
B3' C7' B12' B9' 66.0(8) . . . . ? 
B11' C7' B12' B9' 102.1(7) . . . . ? 
B2' C7' B12' B9' -4.7(9) . . . . ? 
B8' C7' B12' B9' -40.6(6) . . . . ? 
B3' C7' B12' B10' 4.2(9) . . . . ? 
B11' C7' B12' B10' 40.3(7) . . . . ? 
B2' C7' B12' B10' -66.5(9) . . . . ? 
B8' C7' B12' B10' -102.4(8) . . . . ? 
B3' C7' B12' B8' 106.6(8) . . . . ? 
B11' C7' B12' B8' 142.7(8) . . . . ? 
B2' C7' B12' B8' 35.9(7) . . . . ? 
B3' C7' B12' B11' -36.1(7) . . . . ? 
B2' C7' B12' B11' -106.8(8) . . . . ? 
B8' C7' B12' B11' -142.7(8) . . . . ? 
B8' B9' B12' C7' 40.4(6) . . . . ? 
B6' B9' B12' C7' 2.3(9) . . . . ? 
B5' B9' B12' C7' -61.2(8) . . . . ? 
B10' B9' B12' C7' -99.2(7) . . . . ? 
S2 B9' B12' C7' 152.5(6) . . . . ? 
B8' B9' B12' B10' 139.6(8) . . . . ? 
B6' B9' B12' B10' 101.5(8) . . . . ? 
B5' B9' B12' B10' 37.9(7) . . . . ? 
S2 B9' B12' B10' -108.4(8) . . . . ? 
B6' B9' B12' B8' -38.1(7) . . . . ? 
B5' B9' B12' B8' -101.6(8) . . . . ? 
B10' B9' B12' B8' -139.6(8) . . . . ? 
S2 B9' B12' B8' 112.1(8) . . . . ? 
B8' B9' B12' B11' 100.8(8) . . . . ? 
B6' B9' B12' B11' 62.7(9) . . . . ? 
B5' B9' B12' B11' -0.8(9) . . . . ? 
B10' B9' B12' B11' -38.7(7) . . . . ? 
S2 B9' B12' B11' -147.1(7) . . . . ? 
B5' B10' B12' C7' 59.6(8) . . . . ? 
B9' B10' B12' C7' 97.4(7) . . . . ? 
B4' B10' B12' C7' -3.0(9) . . . . ? 
B11' B10' B12' C7' -39.2(6) . . . . ? 
B5' B10' B12' B9' -37.9(7) . . . . ? 
B4' B10' B12' B9' -100.4(8) . . . . ? 
B11' B10' B12' B9' -136.6(7) . . . . ? 
B5' B10' B12' B8' -1.9(9) . . . . ? 
B9' B10' B12' B8' 35.9(7) . . . . ? 
B4' B10' B12' B8' -64.5(8) . . . . ? 
B11' B10' B12' B8' -100.7(8) . . . . ? 
B5' B10' B12' B11' 98.8(7) . . . . ? 
B9' B10' B12' B11' 136.6(7) . . . . ? 
B4' B10' B12' B11' 36.2(6) . . . . ? 
B9' B8' B12' C7' -132.6(7) . . . . ? 
B2' B8' B12' C7' -32.1(7) . . . . ? 
B6' B8' B12' C7' -95.6(8) . . . . ? 
C7' B8' B12' B9' 132.6(7) . . . . ? 
B2' B8' B12' B9' 100.5(8) . . . . ? 
B6' B8' B12' B9' 37.0(7) . . . . ? 
C7' B8' B12' B10' 96.5(7) . . . . ? 
B9' B8' B12' B10' -36.1(7) . . . . ? 
B2' B8' B12' B10' 64.4(9) . . . . ? 
B6' B8' B12' B10' 0.9(9) . . . . ? 
C7' B8' B12' B11' 32.7(6) . . . . ? 
B9' B8' B12' B11' -99.9(8) . . . . ? 
B2' B8' B12' B11' 0.5(10) . . . . ? 
B6' B8' B12' B11' -62.9(9) . . . . ? 
B3' B11' B12' C7' 32.7(6) . . . . ? 
B4' B11' B12' C7' 97.0(7) . . . . ? 
B10' B11' B12' C7' 134.0(7) . . . . ? 
C7' B11' B12' B9' -95.5(8) . . . . ? 
B3' B11' B12' B9' -62.8(9) . . . . ? 
B4' B11' B12' B9' 1.4(9) . . . . ? 
B10' B11' B12' B9' 38.4(7) . . . . ? 
C7' B11' B12' B10' -134.0(7) . . . . ? 
B3' B11' B12' B10' -101.2(8) . . . . ? 
B4' B11' B12' B10' -37.0(7) . . . . ? 
C7' B11' B12' B8' -33.0(6) . . . . ? 
B3' B11' B12' B8' -0.3(9) . . . . ? 
B4' B11' B12' B8' 64.0(9) . . . . ? 
B10' B11' B12' B8' 101.0(8) . . . . ? 
  
_diffrn_measured_fraction_theta_max    0.984 
_diffrn_reflns_theta_full              58.24 
_diffrn_measured_fraction_theta_full   0.984 
_refine_diff_density_max    1.189 
_refine_diff_density_min   -1.038 
_refine_diff_density_rms    0.143 
