# Supplementary material for: A coordination chemistry dichotomy for icosahedral carborane-based ligands
Source: Springer Nature journal article supplement (doi:10.1038/nchem.1088), 2011-07-21
Supplement: 41557_2011_BFnchem1088_MOESM85_ESM.mol [file 41557_2011_BFnchem1088_MOESM85_ESM.mol]

  ChemDraw07181117182D

 89126  0  0  0  0  0  0  0  0999 V2000
    7.1935    3.4557    0.0000 B   0  5  0  0  0  0  0  0  0  0  0  0
    6.4387    3.7886    0.0000 F   0  0  0  0  0  0  0  0  0  0  0  0
    6.8606    2.7008    0.0000 F   0  0  0  0  0  0  0  0  0  0  0  0
    7.9484    3.1228    0.0000 F   0  0  0  0  0  0  0  0  0  0  0  0
    7.5264    4.2105    0.0000 F   0  0  0  0  0  0  0  0  0  0  0  0
    6.7319   -5.3672    0.0000 B   0  5  0  0  0  0  0  0  0  0  0  0
    5.9771   -5.0343    0.0000 F   0  0  0  0  0  0  0  0  0  0  0  0
    6.3990   -6.1221    0.0000 F   0  0  0  0  0  0  0  0  0  0  0  0
    7.4868   -5.7001    0.0000 F   0  0  0  0  0  0  0  0  0  0  0  0
    7.0648   -4.6124    0.0000 F   0  0  0  0  0  0  0  0  0  0  0  0
   -5.4766    3.2346    0.0000 C   0  0  0  0  0  0  0  0  0  0  0  0
   -4.6902    3.4748    0.0000 C   0  0  0  0  0  0  0  0  0  0  0  0
   -6.3102    2.4844    0.0000 C   0  0  0  0  0  0  0  0  0  0  0  0
   -6.6575    3.2297    0.0000 C   0  0  0  0  0  0  0  0  0  0  0  0
   -7.4766    3.3016    0.0000 C   0  0  0  0  0  0  0  0  0  0  0  0
   -7.9484    2.6282    0.0000 C   0  0  0  0  0  0  0  0  0  0  0  0
   -7.6011    1.8829    0.0000 C   0  0  0  0  0  0  0  0  0  0  0  0
   -6.7820    1.8110    0.0000 C   0  0  0  0  0  0  0  0  0  0  0  0
   -5.7681    1.3801    0.0000 C   0  0  0  0  0  0  0  0  0  0  0  0
   -6.5624    1.1675    0.0000 C   0  0  0  0  0  0  0  0  0  0  0  0
   -6.7754    0.3734    0.0000 C   0  0  0  0  0  0  0  0  0  0  0  0
   -6.1942   -0.2082    0.0000 C   0  0  0  0  0  0  0  0  0  0  0  0
   -5.3999    0.0044    0.0000 C   0  0  0  0  0  0  0  0  0  0  0  0
   -5.1869    0.7985    0.0000 C   0  0  0  0  0  0  0  0  0  0  0  0
   -5.4912    2.4125    0.0000 P   0  0  0  0  0  0  0  0  0  0  0  0
   -1.6946    3.4721    0.0000 B   0  0  0  0  0  0  0  0  0  0  0  0
   -1.6399    2.0983    0.0000 B   0  0  0  0  0  0  0  0  0  0  0  0
   -0.4229    1.4587    0.0000 B   0  0  0  0  0  0  0  0  0  0  0  0
    0.7396    2.1929    0.0000 B   0  0  0  0  0  0  0  0  0  0  0  0
    0.6849    3.5667    0.0000 C   0  0  0  0  0  0  0  0  0  0  0  0
   -0.5321    4.2063    0.0000 C   0  0  0  0  0  0  0  0  0  0  0  0
   -0.6388    6.9556    0.0000 B   0  0  0  0  0  0  0  0  0  0  0  0
   -3.9304    0.6791    0.0000 B   0  0  0  0  0  0  0  0  0  0  0  0
    3.1511    0.9667    0.0000 B   0  0  0  0  0  0  0  0  0  0  0  0
   -1.0566    3.1579    0.0000 B   0  0  0  0  0  0  0  0  0  0  0  0
    0.1204    3.2076    0.0000 B   0  0  0  0  0  0  0  0  0  0  0  0
   -0.4761    2.2431    0.0000 B   0  0  0  0  0  0  0  0  0  0  0  0
   -4.2188    2.8011    0.0000 S   0  0  0  0  0  0  0  0  0  0  0  0
   -0.6721    7.7772    0.0000 H   0  0  0  0  0  0  0  0  0  0  0  0
    3.8792    0.5848    0.0000 H   0  0  0  0  0  0  0  0  0  0  0  0
   -4.6252    0.2394    0.0000 H   0  0  0  0  0  0  0  0  0  0  0  0
   -2.4221    3.8552    0.0000 H   0  0  0  0  0  0  0  0  0  0  0  0
   -1.3189    3.9372    0.0000 H   0  0  0  0  0  0  0  0  0  0  0  0
    0.1632    4.6451    0.0000 C   0  0  0  0  0  0  0  0  0  0  0  0
    1.3791    4.0074    0.0000 C   0  0  0  0  0  0  0  0  0  0  0  0
    0.2940    4.0113    0.0000 H   0  0  0  0  0  0  0  0  0  0  0  0
    1.4318    2.6367    0.0000 H   0  0  0  0  0  0  0  0  0  0  0  0
   -0.9992    1.6088    0.0000 H   0  0  0  0  0  0  0  0  0  0  0  0
   -0.3892    0.6372    0.0000 H   0  0  0  0  0  0  0  0  0  0  0  0
   -3.5311   -5.4638    0.0000 C   0  0  0  0  0  0  0  0  0  0  0  0
   -4.1973   -4.9819    0.0000 C   0  0  0  0  0  0  0  0  0  0  0  0
   -4.9477   -5.3179    0.0000 P   0  0  0  0  0  0  0  0  0  0  0  0
   -5.6140   -4.8361    0.0000 C   0  0  0  0  0  0  0  0  0  0  0  0
   -5.0320   -6.1358    0.0000 C   0  0  0  0  0  0  0  0  0  0  0  0
   -5.5294   -4.0154    0.0000 C   0  0  0  0  0  0  0  0  0  0  0  0
   -6.1979   -3.5319    0.0000 C   0  0  0  0  0  0  0  0  0  0  0  0
   -6.9509   -3.8690    0.0000 C   0  0  0  0  0  0  0  0  0  0  0  0
   -7.0354   -4.6897    0.0000 C   0  0  0  0  0  0  0  0  0  0  0  0
   -6.3669   -5.1732    0.0000 C   0  0  0  0  0  0  0  0  0  0  0  0
   -5.7849   -6.4730    0.0000 C   0  0  0  0  0  0  0  0  0  0  0  0
   -5.8695   -7.2936    0.0000 C   0  0  0  0  0  0  0  0  0  0  0  0
   -5.2010   -7.7772    0.0000 C   0  0  0  0  0  0  0  0  0  0  0  0
   -4.4480   -7.4400    0.0000 C   0  0  0  0  0  0  0  0  0  0  0  0
   -4.3635   -6.6194    0.0000 C   0  0  0  0  0  0  0  0  0  0  0  0
   -0.2254   -4.5371    0.0000 B   0  0  0  0  0  0  0  0  0  0  0  0
   -0.1708   -5.9109    0.0000 B   0  0  0  0  0  0  0  0  0  0  0  0
    1.0463   -6.5505    0.0000 B   0  0  0  0  0  0  0  0  0  0  0  0
    2.2087   -5.8163    0.0000 B   0  0  0  0  0  0  0  0  0  0  0  0
    2.1541   -4.4425    0.0000 C   0  0  0  0  0  0  0  0  0  0  0  0
    0.9370   -3.8029    0.0000 C   0  0  0  0  0  0  0  0  0  0  0  0
    0.8304   -1.0536    0.0000 B   0  0  0  0  0  0  0  0  0  0  0  0
   -2.4613   -7.3301    0.0000 B   0  0  0  0  0  0  0  0  0  0  0  0
    4.6202   -7.0425    0.0000 B   0  0  0  0  0  0  0  0  0  0  0  0
    0.4125   -4.8513    0.0000 B   0  0  0  0  0  0  0  0  0  0  0  0
    1.5895   -4.8016    0.0000 B   0  0  0  0  0  0  0  0  0  0  0  0
    0.9931   -5.7661    0.0000 B   0  0  0  0  0  0  0  0  0  0  0  0
   -2.7497   -5.2081    0.0000 S   0  0  0  0  0  0  0  0  0  0  0  0
    0.7970   -0.2320    0.0000 H   0  0  0  0  0  0  0  0  0  0  0  0
    5.3483   -7.4244    0.0000 H   0  0  0  0  0  0  0  0  0  0  0  0
   -3.1561   -7.7698    0.0000 H   0  0  0  0  0  0  0  0  0  0  0  0
   -0.9530   -4.1540    0.0000 H   0  0  0  0  0  0  0  0  0  0  0  0
    0.1502   -4.0720    0.0000 H   0  0  0  0  0  0  0  0  0  0  0  0
    1.6324   -3.3641    0.0000 C   0  0  0  0  0  0  0  0  0  0  0  0
    2.8482   -4.0018    0.0000 C   0  0  0  0  0  0  0  0  0  0  0  0
    1.7631   -3.9980    0.0000 H   0  0  0  0  0  0  0  0  0  0  0  0
    2.9009   -5.3725    0.0000 H   0  0  0  0  0  0  0  0  0  0  0  0
    0.4699   -6.4004    0.0000 H   0  0  0  0  0  0  0  0  0  0  0  0
    1.0799   -7.3720    0.0000 H   0  0  0  0  0  0  0  0  0  0  0  0
   -4.7719   -2.0409    0.0000 Pt  0  2  0  0  0  0  0  0  0  0  0  0
  1  2  1  0      
  1  3  1  0      
  1  4  1  0      
  1  5  1  0      
  6  7  1  0      
  6  8  1  0      
  6  9  1  0      
  6 10  1  0      
 11 25  1  0      
 38 12  1  0      
 12 11  1  0      
 13 14  2  0      
 14 15  1  0      
 15 16  2  0      
 16 17  1  0      
 17 18  2  0      
 13 18  1  0      
 13 25  1  0      
 19 20  2  0      
 20 21  1  0      
 21 22  2  0      
 22 23  1  0      
 23 24  2  0      
 19 24  1  0      
 19 25  1  0      
 38 27  1  0      
 26 27  1  0      
 27 28  1  0      
 28 29  1  0      
 29 30  1  0      
 30 31  1  0      
 31 26  1  0      
 32 33  1  0      
 33 34  1  0      
 34 32  1  0      
 26 33  1  0      
 27 33  1  0      
 28 33  1  0      
 29 34  1  0      
 31 32  1  0      
 26 32  1  0      
 30 32  1  0      
 30 34  1  0      
 28 34  1  0      
 31 35  1  0      
 27 35  1  0      
 26 35  1  0      
 29 36  1  0      
 36 37  1  0      
 37 29  1  0      
 35 36  1  0      
 37 35  1  0      
 30 36  1  0      
 37 28  1  0      
 37 27  1  0      
 36 31  1  0      
 32 39  1  0      
 34 40  1  0      
 33 41  1  0      
 26 42  1  0      
 35 43  1  0      
 31 44  1  0      
 30 45  1  0      
 36 46  1  0      
 29 47  1  0      
 37 48  1  0      
 28 49  1  0      
 77 50  1  0      
 50 51  1  0      
 51 52  1  0      
 52 53  1  0      
 52 54  1  0      
 53 55  2  0      
 55 56  1  0      
 56 57  2  0      
 57 58  1  0      
 58 59  2  0      
 59 53  1  0      
 54 60  2  0      
 60 61  1  0      
 61 62  2  0      
 62 63  1  0      
 63 64  2  0      
 64 54  1  0      
 77 66  1  0      
 65 66  1  0      
 66 67  1  0      
 67 68  1  0      
 68 69  1  0      
 69 70  1  0      
 70 65  1  0      
 71 72  1  0      
 72 73  1  0      
 73 71  1  0      
 65 72  1  0      
 66 72  1  0      
 67 72  1  0      
 68 73  1  0      
 70 71  1  0      
 65 71  1  0      
 69 71  1  0      
 69 73  1  0      
 67 73  1  0      
 70 74  1  0      
 66 74  1  0      
 65 74  1  0      
 68 75  1  0      
 75 76  1  0      
 76 68  1  0      
 74 75  1  0      
 76 74  1  0      
 69 75  1  0      
 76 67  1  0      
 76 66  1  0      
 75 70  1  0      
 71 78  1  0      
 73 79  1  0      
 72 80  1  0      
 65 81  1  0      
 74 82  1  0      
 70 83  1  0      
 69 84  1  0      
 75 85  1  0      
 68 86  1  0      
 76 87  1  0      
 67 88  1  0      
M  CHG  3   1  -1   6  -1  89   2
M  END
