# Supplementary material for: A coordination chemistry dichotomy for icosahedral carborane-based ligands
Source: Springer Nature journal article supplement (doi:10.1038/nchem.1088), 2011-07-21
Supplement: 41557_2011_BFnchem1088_MOESM100_ESM.mol [file 41557_2011_BFnchem1088_MOESM100_ESM.mol]

  ChemDraw07121106542D

 63 64  0  0  0  0  0  0  0  0999 V2000
    4.8432    1.9798    0.0000 B   0  5  0  0  0  0  0  0  0  0  0  0
    4.0883    2.3127    0.0000 F   0  0  0  0  0  0  0  0  0  0  0  0
    4.5103    1.2248    0.0000 F   0  0  0  0  0  0  0  0  0  0  0  0
    5.5981    1.6468    0.0000 F   0  0  0  0  0  0  0  0  0  0  0  0
    5.1762    2.7347    0.0000 F   0  0  0  0  0  0  0  0  0  0  0  0
    4.2096   -2.6036    0.0000 B   0  5  0  0  0  0  0  0  0  0  0  0
    3.4547   -2.2706    0.0000 F   0  0  0  0  0  0  0  0  0  0  0  0
    3.8767   -3.3585    0.0000 F   0  0  0  0  0  0  0  0  0  0  0  0
    4.9646   -2.9365    0.0000 F   0  0  0  0  0  0  0  0  0  0  0  0
    4.5426   -1.8486    0.0000 F   0  0  0  0  0  0  0  0  0  0  0  0
   -3.1318   -2.2825    0.0000 P   0  0  0  0  0  0  0  0  0  0  0  0
   -2.6700   -1.5987    0.0000 C   0  0  0  0  0  0  0  0  0  0  0  0
   -1.8753   -1.8204    0.0000 C   0  0  0  0  0  0  0  0  0  0  0  0
   -3.9521   -2.2246    0.0000 C   0  0  0  0  0  0  0  0  0  0  0  0
   -2.7718   -3.0218    0.0000 C   0  0  0  0  0  0  0  0  0  0  0  0
   -4.4139   -2.9084    0.0000 C   0  0  0  0  0  0  0  0  0  0  0  0
   -5.2369   -2.8503    0.0000 C   0  0  0  0  0  0  0  0  0  0  0  0
   -5.5981   -2.1085    0.0000 C   0  0  0  0  0  0  0  0  0  0  0  0
   -5.1363   -1.4248    0.0000 C   0  0  0  0  0  0  0  0  0  0  0  0
   -4.3133   -1.4828    0.0000 C   0  0  0  0  0  0  0  0  0  0  0  0
   -1.9487   -3.0798    0.0000 C   0  0  0  0  0  0  0  0  0  0  0  0
   -1.5875   -3.8216    0.0000 C   0  0  0  0  0  0  0  0  0  0  0  0
   -2.0493   -4.5054    0.0000 C   0  0  0  0  0  0  0  0  0  0  0  0
   -2.8723   -4.4473    0.0000 C   0  0  0  0  0  0  0  0  0  0  0  0
   -3.2336   -3.7055    0.0000 C   0  0  0  0  0  0  0  0  0  0  0  0
   -1.2880   -1.2449    0.0000 S   0  0  0  0  0  0  0  0  0  0  0  0
   -0.4645   -1.2506    0.0000 C   0  0  0  0  0  0  0  0  0  0  0  0
   -0.0621   -1.9710    0.0000 C   0  0  0  0  0  0  0  0  0  0  0  0
    0.7629   -1.9710    0.0000 C   0  0  0  0  0  0  0  0  0  0  0  0
    1.1855   -1.2506    0.0000 C   0  0  0  0  0  0  0  0  0  0  0  0
    0.7629   -0.5303    0.0000 C   0  0  0  0  0  0  0  0  0  0  0  0
   -0.0621   -0.5303    0.0000 C   0  0  0  0  0  0  0  0  0  0  0  0
   -0.4783   -2.6802    0.0000 F   0  0  0  0  0  0  0  0  0  0  0  0
   -0.4783    0.1789    0.0000 F   0  0  0  0  0  0  0  0  0  0  0  0
    1.1715    0.1832    0.0000 F   0  0  0  0  0  0  0  0  0  0  0  0
    1.1715   -2.6845    0.0000 F   0  0  0  0  0  0  0  0  0  0  0  0
   -2.2012    0.6309    0.0000 Pt  0  2  0  0  0  0  0  0  0  0  0  0
   -0.5854    2.8730    0.0000 C   0  0  0  0  0  0  0  0  0  0  0  0
   -2.3963    3.7706    0.0000 C   0  0  0  0  0  0  0  0  0  0  0  0
   -1.4089    2.8787    0.0000 S   0  0  0  0  0  0  0  0  0  0  0  0
   -1.5786    3.6833    0.0000 C   0  0  0  0  0  0  0  0  0  0  0  0
   -3.4834    3.3538    0.0000 C   0  0  0  0  0  0  0  0  0  0  0  0
   -3.5700    4.1715    0.0000 C   0  0  0  0  0  0  0  0  0  0  0  0
   -4.3215    4.5054    0.0000 C   0  0  0  0  0  0  0  0  0  0  0  0
   -4.9864    4.0215    0.0000 C   0  0  0  0  0  0  0  0  0  0  0  0
   -4.8998    3.2038    0.0000 C   0  0  0  0  0  0  0  0  0  0  0  0
   -4.1483    2.8699    0.0000 C   0  0  0  0  0  0  0  0  0  0  0  0
   -3.3914    2.1786    0.0000 C   0  0  0  0  0  0  0  0  0  0  0  0
   -4.2055    2.2943    0.0000 C   0  0  0  0  0  0  0  0  0  0  0  0
   -4.7128    1.6471    0.0000 C   0  0  0  0  0  0  0  0  0  0  0  0
   -4.4060    0.8842    0.0000 C   0  0  0  0  0  0  0  0  0  0  0  0
   -3.5919    0.7685    0.0000 C   0  0  0  0  0  0  0  0  0  0  0  0
   -3.0846    1.4156    0.0000 C   0  0  0  0  0  0  0  0  0  0  0  0
   -2.7320    3.0199    0.0000 P   0  0  0  0  0  0  0  0  0  0  0  0
   -0.1831    2.1527    0.0000 C   0  0  0  0  0  0  0  0  0  0  0  0
    0.6419    2.1527    0.0000 C   0  0  0  0  0  0  0  0  0  0  0  0
    1.0646    2.8730    0.0000 C   0  0  0  0  0  0  0  0  0  0  0  0
    0.6419    3.5934    0.0000 C   0  0  0  0  0  0  0  0  0  0  0  0
   -0.1831    3.5934    0.0000 C   0  0  0  0  0  0  0  0  0  0  0  0
   -0.5993    1.4435    0.0000 F   0  0  0  0  0  0  0  0  0  0  0  0
   -0.5993    4.3026    0.0000 F   0  0  0  0  0  0  0  0  0  0  0  0
    1.0506    4.3069    0.0000 F   0  0  0  0  0  0  0  0  0  0  0  0
    1.0506    1.4391    0.0000 F   0  0  0  0  0  0  0  0  0  0  0  0
  1  2  1  0      
  1  3  1  0      
  1  4  1  0      
  1  5  1  0      
  6  7  1  0      
  6  8  1  0      
  6  9  1  0      
  6 10  1  0      
 11 12  1  0      
 12 13  1  0      
 13 26  1  0      
 11 14  1  0      
 11 15  1  0      
 14 16  2  0      
 16 17  1  0      
 17 18  2  0      
 18 19  1  0      
 19 20  2  0      
 20 14  1  0      
 15 21  2  0      
 21 22  1  0      
 22 23  2  0      
 23 24  1  0      
 24 25  2  0      
 25 15  1  0      
 26 27  1  0      
 27 28  2  0      
 28 29  1  0      
 29 30  2  0      
 30 31  1  0      
 31 32  2  0      
 32 27  1  0      
 28 33  1  0      
 32 34  1  0      
 31 35  1  0      
 29 36  1  0      
 40 38  1  0      
 39 54  1  0      
 40 41  1  0      
 41 39  1  0      
 42 43  2  0      
 43 44  1  0      
 44 45  2  0      
 45 46  1  0      
 46 47  2  0      
 42 47  1  0      
 42 54  1  0      
 48 49  2  0      
 49 50  1  0      
 50 51  2  0      
 51 52  1  0      
 52 53  2  0      
 48 53  1  0      
 48 54  1  0      
 38 55  2  0      
 55 56  1  0      
 56 57  2  0      
 57 58  1  0      
 58 59  2  0      
 59 38  1  0      
 55 60  1  0      
 59 61  1  0      
 58 62  1  0      
 56 63  1  0      
M  CHG  3   1  -1   6  -1  37   2
M  END
